# Supplementary material for: DNA Methylation Regulates Transcription Factor-Specific Neurodevelopmental but Not Sexually Dimorphic Gene Expression Dynamics in Zebra Finch Telencephalon
Source: Front Cell Dev Biol. 2021 Mar 19;9:583555. doi: 10.3389/fcell.2021.583555 (PMC8017237; doi:10.3389/fcell.2021.583555)
Supplement: Supplementary Data Sheet 1 — TFBS analysis for flanking regions of age dependent differentially methylated CpG dinucleotides. [file Data_Sheet_1.XLSX]

## Sheet: Table S16
Table S16: TFBS analysis for flanking regions of age dependent differentially methylated CpG dinucleotides
Columns contain the following information from left to right: “TF”: transcription factor symbol, “Counts”: the number of TFBS found in flanking regions of differentially methylated CpG dinucleotides, “Counts_ns”: the number of TFBS found flanking regions of non-differentially methylated CpG dinucleotides, “class”: TF class, “family”: TF family, “p-value”: p-value for chi-squared test, “direction”…

## Sheet: JASPAR_TF_RRBS_comp_h
TF	Counts (n=3120)	Counts_ns (n=10027)	class	family	p_value	direction	FDR	logFC	FC	filter
SP2	570	3158	C2H2 zinc finger factors	Three-zinc finger KrÃ¼ppel-related factors	2.48728e-46	depleted	1.11181e-43	-0.785705	0.580068	FALSE
EGR3	408	2369	C2H2 zinc finger factors	Three-zinc finger KrÃ¼ppel-related factors	2.64615e-36	depleted	5.91415e-34	-0.853365	0.553492	FALSE
TFDP1	695	3354	Fork head / winged helix factors	E2F-related factors	4.67523e-32	depleted	6.96609e-30	-0.586526	0.665945	FALSE
SP1	340	1999	C2H2 zinc finger factors	Three-zinc finger KrÃ¼ppel-related factors	1.28422e-30	depleted	1.43512e-28	-0.8714	0.546616	FALSE
KLF16	227	1424	C2H2 zinc finger factors	Three-zinc finger KrÃ¼ppel-related factors	2.85102e-24	depleted	2.54881e-22	-0.964913	0.512309	FALSE
EGR1	265	1553	C2H2 zinc finger factors	Three-zinc finger Kruppel-related factors	6.5474e-23	depleted	4.21486e-21	-0.866721	0.548392	FALSE
E2F4	535	2583	Fork head / winged helix factors	E2F-related factors	6.60045e-23	depleted	4.21486e-21	-0.587165	0.66565	FALSE
ZIC4	579	2681	C2H2 zinc finger factors	More than 3 adjacent zinc finger factors	3.0626e-20	depleted	1.71123e-18	-0.526864	0.694062	FALSE
EGR2	254	1417	C2H2 zinc finger factors	Three-zinc finger KrÃ¼ppel-related factors	2.27309e-18	depleted	1.12897e-16	-0.795667	0.576077	FALSE
HINFP	317	1646	C2H2 zinc finger factors	Factors with multiple dispersed zinc fingers	1.42335e-17	depleted	6.36239e-16	-0.692137	0.618936	FALSE
CTCFL	774	3295	C2H2 zinc finger factors	More than 3 adjacent zinc finger factors	2.33038e-17	depleted	9.46983e-16	-0.405601	0.754922	FALSE
EGR4	303	1581	C2H2 zinc finger factors	Three-zinc finger KrÃ¼ppel-related factors	4.39342e-17	depleted	1.63655e-15	-0.699176	0.615924	FALSE
ZIC1	547	2486	C2H2 zinc finger factors	More than 3 adjacent zinc finger factors	5.14495e-17	depleted	1.76907e-15	-0.499941	0.707135	FALSE
NRF1	626	2752	Basic leucine zipper factors (bZIP)	Jun-related factors	2.0761e-16	depleted	6.6287e-15	-0.451974	0.731042	FALSE
TFAP2B(var.2)	516	2325	Basic helix-span-helix factors (bHSH)	AP-2	3.98244e-15	depleted	1.18677e-13	-0.487516	0.713252	FALSE
KLF5	253	1334	C2H2 zinc finger factors	Three-zinc finger KrÃ¼ppel-related factors	9.39651e-15	depleted	2.62515e-13	-0.714277	0.60951	FALSE
SP4	239	1277	C2H2 zinc finger factors	Three-zinc finger KrÃ¼ppel-related factors	1.16889e-14	depleted	3.07349e-13	-0.733404	0.601483	FALSE
ZBTB7A	276	1402	C2H2 zinc finger factors	More than 3 adjacent zinc finger factors	7.56154e-14	depleted	1.87778e-12	-0.660474	0.63267	FALSE
TFAP2A	570	2466	Basic helix-span-helix factors (bHSH)	AP-2	2.95891e-13	depleted	6.96123e-12	-0.428867	0.742845	FALSE
SP8	238	1227	C2H2 zinc finger factors	Three-zinc finger KrÃ¼ppel-related factors	1.14291e-12	depleted	2.55441e-11	-0.68183	0.623374	FALSE
ZNF263	367	1714	C2H2 zinc finger factors	More than 3 adjacent zinc finger factors	1.28013e-12	depleted	2.72485e-11	-0.539243	0.688132	FALSE
SP3	275	1361	C2H2 zinc finger factors	Three-zinc finger KrÃ¼ppel-related factors	2.51677e-12	depleted	5.11362e-11	-0.622891	0.649368	FALSE
E2F6	324	1543	Fork head / winged helix factors	E2F-related factors	3.32021e-12	depleted	6.45275e-11	-0.5674	0.674832	FALSE
TFAP2A(var.2)	820	3274	Basic helix-span-helix factors (bHSH)	AP-2	2.26247e-11	depleted	4.21386e-10	-0.313086	0.804918	FALSE
PLAG1	354	1622	C2H2 zinc finger factors	More than 3 adjacent zinc finger factors	5.21864e-11	depleted	9.33094e-10	-0.51168	0.701405	FALSE
PAX9	69	478	Paired box factors	Paired domain only	5.95566e-10	depleted	1.02392e-08	-1.10807	0.463914	TRUE
TFAP2B(var.3)	502	2118	Basic helix-span-helix factors (bHSH)	AP-2	9.31525e-10	depleted	1.52373e-08	-0.392671	0.761718	FALSE
NR2C2	131	735	Nuclear receptors with C4 zinc fingers	RXR-related receptors (NR2)	9.54459e-10	depleted	1.52373e-08	-0.803905	0.572797	FALSE
ZIC3	450	1928	C2H2 zinc finger factors	More than 3 adjacent zinc finger factors	1.33772e-09	depleted	2.06193e-08	-0.414836	0.750105	FALSE
GLIS1	127	706	C2H2 zinc finger factors	More than 3 adjacent zinc finger factors	3.50405e-09	depleted	5.22104e-08	-0.790568	0.578117	FALSE
YY2	31	288	C2H2 zinc finger factors	More than 3 adjacent zinc finger factors	3.87838e-09	depleted	5.59237e-08	-1.53146	0.345928	TRUE
KLF14	178	906	C2H2 zinc finger factors	Three-zinc finger KrÃ¼ppel-related factors	4.37456e-09	depleted	6.11072e-08	-0.663362	0.631405	FALSE
RARA::RXRG	101	594	Nuclear receptors with C4 zinc fingers::Nuclear receptors with C4 zinc fingers	Thyroid hormone receptor-related factors (NR1)::RXR-related receptors (NR2)	6.18873e-09	depleted	8.38292e-08	-0.871836	0.546451	FALSE
TFAP2C(var.3)	540	2223	Basic helix-span-helix factors (bHSH)	AP-2	6.76501e-09	depleted	8.894e-08	-0.357205	0.780676	FALSE
ZBTB33	164	846	C2H2 zinc finger factors	Other factors with up to three adjacent zinc fingers	7.12834e-09	depleted	9.10391e-08	-0.68269	0.623003	FALSE
TFAP2A(var.3)	593	2405	Basic helix-span-helix factors (bHSH)	AP-2	8.20449e-09	depleted	1.01872e-07	-0.335661	0.792421	FALSE
REST	400	1712	C2H2 zinc finger factors	Factors with multiple dispersed zinc fingers	1.88246e-08	depleted	2.27421e-07	-0.413339	0.750884	FALSE
MAX	63	83	Basic helix-loop-helix factors (bHLH)	bHLH-ZIP factors	5.08374e-08	enriched	5.98008e-07	1.28651	2.43938	TRUE
GCM2	138	722	GCM domain factors	GCM factors	5.38141e-08	depleted	6.16792e-07	-0.703058	0.614269	FALSE
ASCL1	666	2607	Basic helix-loop-helix factors (bHLH)	MyoD / ASC-related factors	1.73045e-07	depleted	1.93378e-06	-0.284524	0.821012	FALSE
MNT	63	89	Basic helix-loop-helix factors (bHLH)	bHLH-ZIP factors	4.02186e-07	enriched	4.3848e-06	1.18582	2.27492	TRUE
TFAP2C(var.2)	403	1671	Basic helix-span-helix factors (bHSH)	AP-2	6.09713e-07	depleted	6.48909e-06	-0.367588	0.775077	FALSE
GLIS2	265	1171	C2H2 zinc finger factors	More than 3 adjacent zinc finger factors	7.50223e-07	depleted	7.79883e-06	-0.459405	0.727286	FALSE
NR4A2::RXRA	41	293	Nuclear receptors with C4 zinc fingers::Nuclear receptors with C4 zinc fingers	NGFI-B-related receptors (NR4)::RXR-related receptors (NR2)	8.66038e-07	depleted	8.79816e-06	-1.15293	0.44971	TRUE
MAF::NFE2	10	134	Basic leucine zipper factors (bZIP)::Basic leucine zipper factors (bZIP)	Maf-related factors::Jun-related factors	3.12079e-06	depleted	3.09998e-05	-2.05989	0.239834	TRUE
E2F2	17	10	Fork head / winged helix factors	E2F-related factors	4.87504e-06	enriched	4.73727e-05	2.44981	5.46343	TRUE
ESRRA	66	104	Nuclear receptors with C4 zinc fingers	Steroid hormone receptors (NR3)	5.00252e-06	enriched	4.75771e-05	1.02823	2.03952	TRUE
ETV6	24	200	Tryptophan cluster factors	Ets-related factors	5.63237e-06	depleted	5.24514e-05	-1.37462	0.385654	TRUE
TFAP2B	607	2337	Basic helix-span-helix factors (bHSH)	AP-2	7.36764e-06	depleted	6.72109e-05	-0.260617	0.834731	FALSE
KLF9	214	949	C2H2 zinc finger factors	Three-zinc finger Kruppel-related factors	9.0078e-06	depleted	8.05298e-05	-0.464525	0.72471	FALSE
ZNF740	167	769	C2H2 zinc finger factors	Other factors with up to three adjacent zinc fingers	1.33111e-05	depleted	0.000116668	-0.518863	0.697921	FALSE
HOXA10	13	6	Homeo domain factors	HOX-related factors	1.61619e-05	enriched	0.00013893	2.79975	6.96319	TRUE
TFAP2C	627	2374	Basic helix-span-helix factors (bHSH)	AP-2	3.52943e-05	depleted	0.000297671	-0.23651	0.848796	FALSE
E2F3	17	13	Fork head / winged helix factors	E2F-related factors	5.57318e-05	enriched	0.000461335	2.0713	4.20264	TRUE
PAX1	73	388	Paired box factors	Paired domain only	6.3013e-05	depleted	0.000512123	-0.725816	0.604655	FALSE
FOS::JUNB	7	96	Basic leucine zipper factors (bZIP)::Basic leucine zipper factors (bZIP)	Fos-related factors::Jun-related factors	8.15968e-05	depleted	0.000640883	-2.09334	0.234338	TRUE
MZF1(var.2)	94	468	C2H2 zinc finger factors	More than 3 adjacent zinc finger factors	8.17233e-05	depleted	0.000640883	-0.631504	0.645503	FALSE
CLOCK	52	85	Basic helix-loop-helix factors (bHLH)	PAS domain factors	0.000126543	enriched	0.000961901	0.975321	1.96608	FALSE
PBX1	7	1	Homeo domain factors	TALE-type homeo domain factors	0.000130697	enriched	0.000961901	4.49163	22.4965	TRUE
BHLHE23	7	1	Basic helix-loop-helix factors (bHLH)	Tal-related factors	0.000130697	enriched	0.000961901	4.49163	22.4965	TRUE
RARA::RXRA	71	372	Nuclear receptors with C4 zinc fingers::Nuclear receptors with C4 zinc fingers	Thyroid hormone receptor-related factors (NR1)::RXR-related receptors (NR2)	0.000133052	depleted	0.000961901	-0.70514	0.613383	FALSE
OLIG2	8	2	Basic helix-loop-helix factors (bHLH)	Tal-related factors	0.000137722	enriched	0.000961901	3.68427	12.8551	TRUE
OLIG1	8	2	Basic helix-loop-helix factors (bHLH)	Tal-related factors	0.000137722	enriched	0.000961901	3.68427	12.8551	TRUE
OLIG3	8	2	Basic helix-loop-helix factors (bHLH)	Tal-related factors	0.000137722	enriched	0.000961901	3.68427	12.8551	TRUE
JUN(var.2)	8	97	Basic leucine zipper factors (bZIP)	Jun-related factors	0.000156035	depleted	0.00107304	-1.91564	0.265054	TRUE
GLI2	52	292	C2H2 zinc finger factors	More than 3 adjacent zinc finger factors	0.000182679	depleted	0.00123723	-0.805113	0.572317	FALSE
GABPA	63	335	Tryptophan cluster factors	Ets-related factors	0.000212835	depleted	0.00141539	-0.726465	0.604383	FALSE
FOSL1	9	100	Basic leucine zipper factors (bZIP)	Fos-related factors	0.000215317	depleted	0.00141539	-1.78966	0.28924	TRUE
MTF1	97	467	C2H2 zinc finger factors	More than 3 adjacent zinc finger factors	0.000235879	depleted	0.00152809	-0.583094	0.667531	FALSE
FOSL1::JUNB	8	94	Basic leucine zipper factors (bZIP)::Basic leucine zipper factors (bZIP)	Fos-related factors::Jun-related factors	0.000242852	depleted	0.00155078	-1.87032	0.273513	TRUE
RORA(var.2)	13	9	Nuclear receptors with C4 zinc fingers	Thyroid hormone receptor-related factors (NR1)	0.000261407	enriched	0.00164576	2.21479	4.64213	TRUE
SOX10	50	84	High-mobility group (HMG) domain factors	SOX-related factors	0.000303343	enriched	0.00188325	0.935811	1.91297	FALSE
PPARG::RXRA	116	535	Nuclear receptors with C4 zinc fingers::Nuclear receptors with C4 zinc fingers	Thyroid hormone receptor-related factors (NR1)::RXR-related receptors (NR2)	0.000330565	depleted	0.00202363	-0.521142	0.69682	FALSE
FOSB::JUNB	10	102	Basic leucine zipper factors (bZIP)::Basic leucine zipper factors (bZIP)	Fos-related factors::Jun-related factors	0.000335009	depleted	0.00202363	-1.66623	0.315077	TRUE
RARA(var.2)	45	257	Nuclear receptors with C4 zinc fingers	Thyroid hormone receptor-related factors (NR1)	0.000342291	depleted	0.00204005	-0.829499	0.562724	FALSE
IRF5	12	111	Tryptophan cluster factors	Interferon-regulatory factors	0.000379543	depleted	0.00223181	-1.52518	0.347436	TRUE
FOS::JUN	11	106	Basic leucine zipper factors (bZIP)::Basic leucine zipper factors (bZIP)	Fos-related factors::Jun-related factors	0.000384451	depleted	0.00223181	-1.58422	0.333506	TRUE
PAX5	160	695	Paired box factors	Paired domain only	0.000422873	depleted	0.00242339	-0.434669	0.739863	FALSE
FOS::JUND	12	109	Basic leucine zipper factors (bZIP)::Basic leucine zipper factors (bZIP)	Fos-related factors::Jun-related factors	0.000499548	depleted	0.00282656	-1.49895	0.353811	TRUE
JUND	11	104	Basic leucine zipper factors (bZIP)	Jun-related factors	0.000507988	depleted	0.002827	-1.55674	0.339919	TRUE
FOSL2::JUND	10	99	Basic leucine zipper factors (bZIP)::Basic leucine zipper factors (bZIP)	Fos-related factors::Jun-related factors	0.000512275	depleted	0.002827	-1.62316	0.324624	TRUE
BHLHE22	8	3	Basic helix-loop-helix factors (bHLH)	Tal-related factors	0.000526903	enriched	0.00287227	3.09931	8.57009	TRUE
FOS	10	98	Basic leucine zipper factors (bZIP)	Fos-related factors	0.000589782	depleted	0.0031763	-1.60851	0.327937	TRUE
BARHL2	7	2	Homeo domain factors	NK-related factors	0.000625034	enriched	0.00332607	3.49163	11.2482	TRUE
FOSL2::JUN	12	107	Basic leucine zipper factors (bZIP)::Basic leucine zipper factors (bZIP)	Fos-related factors::Jun-related factors	0.000656514	depleted	0.00342018	-1.47223	0.360424	TRUE
ZBTB7B	161	692	C2H2 zinc finger factors	More than 3 adjacent zinc finger factors	0.00065802	depleted	0.00342018	-0.419439	0.747715	FALSE
FOSL2	16	125	Basic leucine zipper factors (bZIP)	Fos-related factors	0.000736294	depleted	0.00378303	-1.28151	0.411364	TRUE
MNX1	12	9	Homeo domain factors	HOX-related factors	0.0008226	enriched	0.00417844	2.09931	4.28504	TRUE
HIC2	347	1347	C2H2 zinc finger factors	Factors with multiple dispersed zinc fingers	0.000851247	depleted	0.00423344	-0.27247	0.827901	FALSE
ZBTB7C	200	829	C2H2 zinc finger factors	More than 3 adjacent zinc finger factors	0.000852371	depleted	0.00423344	-0.3671	0.775339	FALSE
JUNB	12	104	Basic leucine zipper factors (bZIP)	Jun-related factors	0.000986192	depleted	0.00484426	-1.43121	0.370821	TRUE
TBX5	14	111	T-Box factors	TBX2-related factors	0.00135808	depleted	0.0065985	-1.30279	0.405342	TRUE
TFEB	38	63	Basic helix-loop-helix factors (bHLH)	bHLH-ZIP factors	0.00148839	enriched	0.00715386	0.95492	1.93847	FALSE
MEOX2	10	7	Homeo domain factors	HOX-related factors	0.00182155	enriched	0.00866207	2.19885	4.59112	TRUE
FOSL1::JUND	8	80	Basic leucine zipper factors (bZIP)::Basic leucine zipper factors (bZIP)	Fos-related factors::Jun-related factors	0.00184937	depleted	0.00870179	-1.63766	0.321378	TRUE
FOSL1::JUN	14	108	Basic leucine zipper factors (bZIP)::Basic leucine zipper factors (bZIP)	Fos-related factors::Jun-related factors	0.00200174	depleted	0.00932061	-1.26326	0.416601	TRUE
FOSL2::JUNB	7	74	Basic leucine zipper factors (bZIP)::Basic leucine zipper factors (bZIP)	Fos-related factors::Jun-related factors	0.00213299	depleted	0.00982932	-1.71783	0.304006	TRUE
CTCF	295	1146	C2H2 zinc finger factors	More than 3 adjacent zinc finger factors	0.00229149	depleted	0.010452	-0.273548	0.827282	FALSE
MEIS3	39	212	Homeo domain factors	TALE-type homeo domain factors	0.00264744	depleted	0.0119536	-0.758246	0.591215	FALSE
NKX6-1	16	18	Homeo domain factors	NK-related factors	0.00270429	enriched	0.0120882	1.51435	2.8567	TRUE
RELA	81	375	Rel homology region (RHR) factors	NF-kappaB-related factors	0.00276145	depleted	0.0122215	-0.526625	0.694177	FALSE
CREB3L1	32	182	Basic leucine zipper factors (bZIP)	CREB-related factors	0.00305323	depleted	0.0133804	-0.823523	0.565061	FALSE
INSM1	240	944	C2H2 zinc finger factors	Factors with multiple dispersed zinc fingers	0.00374332	depleted	0.0161684	-0.29148	0.817063	FALSE
TEAD3	32	53	TEA domain factors	TEF-1-related factors	0.00376178	enriched	0.0161684	0.956352	1.9404	FALSE
ONECUT1	8	5	Homeo domain factors	HD-CUT factors	0.00398228	enriched	0.0169531	2.36234	5.14205	TRUE
TBX1	9	79	T-Box factors	TBX1-related factors	0.00420973	depleted	0.0175864	-1.44958	0.366127	TRUE
TBX4	9	79	T-Box factors	TBX2-related factors	0.00420973	depleted	0.0175864	-1.44958	0.366127	TRUE
GCM1	216	857	GCM domain factors	GCM factors	0.00429183	depleted	0.0177634	-0.303992	0.810008	FALSE
NFATC2	25	38	Rel homology region (RHR) factors	NFAT-related factors	0.00458779	enriched	0.0188142	1.0802	2.11433	TRUE
ELK4	76	349	Tryptophan cluster factors	Ets-related factors	0.00475161	depleted	0.0193088	-0.514884	0.699849	FALSE
NFYA	1	36	Other alpha	NFY	0.0048414	depleted	0.0194964	-3.48565	0.0892717	TRUE
AR	47	236	Nuclear receptors with C4 zinc fingers	Steroid hormone receptors (NR3)	0.00548457	depleted	0.0218893	-0.643782	0.640033	FALSE
TFCP2	8	71	Grainyhead domain factors	CP2-related factors	0.00656171	depleted	0.0257734	-1.46548	0.362116	TRUE
MGA	15	103	T-Box factors	TBX6-related factors	0.00657307	depleted	0.0257734	-1.09534	0.468027	TRUE
YY1	26	149	C2H2 zinc finger factors	More than 3 adjacent zinc finger factors	0.00717541	depleted	0.0278763	-0.834457	0.560794	FALSE
NR4A2	59	123	Nuclear receptors with C4 zinc fingers	NGFI-B-related receptors (NR4)	0.00723413	enriched	0.0278763	0.624401	1.54157	FALSE
NEUROD1	127	308	Basic helix-loop-helix factors (bHLH)	Tal-related factors	0.0076603	enriched	0.0292663	0.40617	1.32516	FALSE
TBX20	2	39	T-Box factors	TBX1-related factors	0.00785601	depleted	0.0297596	-2.60113	0.164809	TRUE
NKX2-3	11	11	Homeo domain factors	NK-related factors	0.00810383	enriched	0.0304404	1.68427	3.21378	TRUE
STAT3	29	160	STAT domain factors	STAT factors	0.00819268	depleted	0.0305177	-0.779675	0.582498	FALSE
HES7	178	710	Basic helix-loop-helix factors (bHLH)	Hairy-related factors	0.00845624	depleted	0.0312392	-0.31167	0.805709	FALSE
NR2F2	42	81	Nuclear receptors with C4 zinc fingers	RXR-related receptors (NR2)	0.00876009	enriched	0.0320964	0.73674	1.66641	FALSE
KLF4	66	303	C2H2 zinc finger factors	Three-zinc finger Kruppel-related factors	0.00891944	depleted	0.0324145	-0.514508	0.700032	FALSE
TBX21	2	38	T-Box factors	TBrain-related factors	0.00924705	depleted	0.0333341	-2.56366	0.169146	TRUE
NKX6-2	14	17	Homeo domain factors	NK-related factors	0.0094177	enriched	0.0336777	1.40416	2.64664	TRUE
MEIS2	57	268	Homeo domain factors	TALE-type homeo domain factors	0.00955927	depleted	0.0339126	-0.548927	0.683528	FALSE
RREB1	87	380	C2H2 zinc finger factors	Factors with multiple dispersed zinc fingers	0.00977935	depleted	0.0344202	-0.44264	0.735787	FALSE
VAX1	9	8	Homeo domain factors	NK-related factors	0.010852	enriched	0.0376034	1.8542	3.6155	TRUE
VAX2	9	8	Homeo domain factors	NK-related factors	0.010852	enriched	0.0376034	1.8542	3.6155	TRUE
ESRRB	47	95	Nuclear receptors with C4 zinc fingers	Steroid hormone receptors (NR3)	0.0111242	enriched	0.0382502	0.669005	1.58998	FALSE
IRF8	3	42	Tryptophan cluster factors	Interferon-regulatory factors	0.0117393	depleted	0.040057	-2.12308	0.229556	TRUE
NFE2	4	47	Basic leucine zipper factors (bZIP)	Jun-related factors	0.0121638	depleted	0.04074	-1.87032	0.273513	TRUE
NHLH1	222	857	Basic helix-loop-helix factors (bHLH)	Tal-related factors	0.0121811	depleted	0.04074	-0.264463	0.832508	FALSE
BACH2	31	164	Basic leucine zipper factors (bZIP)	Jun-related factors	0.0122129	depleted	0.04074	-0.719084	0.607483	FALSE
EWSR1-FLI1	175	692	Tryptophan cluster factors	Ets-related factors	0.0124592	depleted	0.0412538	-0.299145	0.812734	FALSE
ZBED1	1	30	C2H2 zinc finger factors	BED zinc finger factors	0.0133063	depleted	0.0437345	-3.22262	0.107126	TRUE
TBX15	20	118	T-Box factors	TBX1-related factors	0.0137397	depleted	0.0448295	-0.876443	0.544709	FALSE
RFX3	14	91	Fork head / winged helix factors	RFX-related factors	0.0164215	depleted	0.0531914	-1.01617	0.494428	TRUE
NFYB	10	73	Other alpha	NFY	0.0172915	depleted	0.0556066	-1.18362	0.440244	TRUE
ETV3	43	88	Tryptophan cluster factors	Ets-related factors	0.0185076	enriched	0.059092	0.651105	1.57037	FALSE
ID4	187	726	Basic helix-loop-helix factors (bHLH)	HLH domain only	0.0186575	depleted	0.0591483	-0.272659	0.827792	FALSE
BHLHE40	40	81	Basic helix-loop-helix factors (bHLH)	Hairy-related factors	0.0206024	enriched	0.064854	0.66635	1.58705	FALSE
NR1A4::RXRA	42	200	Nuclear receptors with C4 zinc fingers::Nuclear receptors with C4 zinc fingers	Thyroid hormone receptor-related factors (NR1)::RXR-related receptors (NR2)	0.0227848	depleted	0.0712225	-0.567267	0.674894	FALSE
GSC2	17	26	Homeo domain factors	Paired-related HD factors	0.0238034	enriched	0.0738897	1.0713	2.10132	TRUE
SPDEF	37	180	Tryptophan cluster factors	Ets-related factors	0.0243106	depleted	0.0749436	-0.598128	0.660611	FALSE
EOMES	2	32	T-Box factors	TBrain-related factors	0.024593	depleted	0.0752951	-2.31573	0.200861	TRUE
NR4A1	34	67	Nuclear receptors with C4 zinc fingers	NGFI-B-related receptors (NR4)	0.0252353	enriched	0.0767358	0.705646	1.63087	FALSE
ESR1	142	366	Nuclear receptors with C4 zinc fingers	Steroid hormone receptors (NR3)	0.0259088	enriched	0.0782517	0.318319	1.24688	FALSE
NFE2L2	29	148	Basic leucine zipper factors (bZIP)	Jun-related factors	0.0261243	depleted	0.0783728	-0.6672	0.629728	FALSE
TBR1	2	31	T-Box factors	TBrain-related factors	0.0289457	depleted	0.0862581	-2.26992	0.207341	TRUE
NEUROD2	8	8	Basic helix-loop-helix factors (bHLH)	Tal-related factors	0.0294596	enriched	0.0872082	1.68427	3.21378	TRUE
NFATC3	13	18	Rel homology region (RHR) factors	NFAT-related factors	0.029717	enriched	0.0872207	1.21479	2.32106	TRUE
NFIC	34	166	SMAD/NF-1 DNA-binding domain factors	Nuclear factor 1	0.0299186	depleted	0.0872207	-0.603304	0.658245	FALSE
TFE3	3	36	Basic helix-loop-helix factors (bHLH)	bHLH-ZIP factors	0.0300492	depleted	0.0872207	-1.90069	0.267815	TRUE
GLIS3	117	470	C2H2 zinc finger factors	More than 3 adjacent zinc finger factors	0.0304422	depleted	0.0877915	-0.32188	0.800027	FALSE
SOX9	11	14	High-mobility group (HMG) domain factors	SOX-related factors	0.0316304	enriched	0.0906334	1.33635	2.52511	TRUE
RFX2	13	81	Fork head / winged helix factors	RFX-related factors	0.0321127	depleted	0.0914292	-0.955138	0.515792	FALSE
TEAD4	29	56	TEA domain factors	TEF-1-related factors	0.0331598	enriched	0.0938129	0.734898	1.66428	FALSE
JDP2	2	30	Basic leucine zipper factors (bZIP)	Fos-related factors	0.034067	depleted	0.0949056	-2.22262	0.214252	TRUE
TBX2	2	30	T-Box factors	TBX2-related factors	0.034067	depleted	0.0949056	-2.22262	0.214252	TRUE
NFKB2	168	647	Rel homology region (RHR) factors	NF-kappaB-related factors	0.034183	depleted	0.0949056	-0.261032	0.834491	FALSE
RFX5	18	101	Fork head / winged helix factors	RFX-related factors	0.0349963	depleted	0.0965637	-0.804014	0.572753	FALSE
NR1H4	13	80	Nuclear receptors with C4 zinc fingers	Thyroid hormone receptor-related factors (NR1)	0.0360499	depleted	0.0988607	-0.937216	0.52224	FALSE
MEIS1	0	18	Homeo domain factors	TALE-type homeo domain factors	0.0365247	depleted	0.099552	0	1	FALSE
RORC	14	21	Nuclear receptors with C4 zinc fingers	Thyroid hormone receptor-related factors (NR1)	0.0387953	enriched	0.1051	1.09931	2.14252	FALSE
HIF1A	128	332	Basic helix-loop-helix factors (bHLH)	PAS domain factors	0.040812	enriched	0.109897	0.309233	1.23905	FALSE
PDX1	13	19	Homeo domain factors	HOX-related factors	0.0412549	enriched	0.110425	1.13678	2.1989	FALSE
JUN::JUNB	10	66	Basic leucine zipper factors (bZIP)::Basic leucine zipper factors (bZIP)	Jun-related factors::Jun-related factors	0.0415707	depleted	0.110608	-1.03819	0.486937	FALSE
TP73	24	123	p53 domain factors	p53-related factors	0.0428912	depleted	0.113331	-0.67328	0.627079	FALSE
JUN::JUNB(var.2)	24	45	Basic leucine zipper factors (bZIP)::Basic leucine zipper factors (bZIP)	Jun-related factors::Jun-related factors	0.0432266	enriched	0.113331	0.777381	1.71402	FALSE
CREB3	20	107	Basic leucine zipper factors (bZIP)	CREB-related factors	0.0433548	depleted	0.113331	-0.735267	0.600707	FALSE
PBX3	93	378	Homeo domain factors	TALE-type homeo domain factors	0.0438155	depleted	0.113869	-0.338812	0.790692	FALSE
GATA1::TAL1	16	26	Other C4 zinc finger-type factors::Basic helix-loop-helix factors (bHLH)	GATA-type zinc fingers::Tal-related factors	0.0444431	enriched	0.114833	0.983832	1.97771	FALSE
TCF7L2	11	15	High-mobility group (HMG) domain factors	TCF-7-related factors	0.0457284	enriched	0.11614	1.23681	2.35677	FALSE
LMX1A	11	15	Homeo domain factors	HD-LIM factors	0.0457284	enriched	0.11614	1.23681	2.35677	FALSE
LMX1B	11	15	Homeo domain factors	HD-LIM factors	0.0457284	enriched	0.11614	1.23681	2.35677	FALSE
HNF1A	4	2	Homeo domain factors	POU domain factors	0.0462974	enriched	0.11692	2.68427	6.42756	FALSE
NFKB1	135	524	Rel homology region (RHR) factors	NF-kappaB-related factors	0.0496783	depleted	0.124754	-0.272335	0.827978	FALSE
GSX2	14	22	Homeo domain factors	HOX-related factors	0.0518436	enriched	0.129464	1.0322	2.04513	FALSE
SOX13	16	27	High-mobility group (HMG) domain factors	SOX-related factors	0.0572694	enriched	0.142219	0.929385	1.90446	FALSE
STAT1	18	96	STAT domain factors	STAT factors	0.0585753	depleted	0.144658	-0.730765	0.602584	FALSE
REL	79	322	Rel homology region (RHR) factors	NF-kappaB-related factors	0.0618571	depleted	0.151924	-0.342864	0.788474	FALSE
ETV2	22	42	Tryptophan cluster factors	Ets-related factors	0.063025	enriched	0.153946	0.751386	1.68341	FALSE
THAP1	528	1843	C2CH THAP-type zinc finger factors	THAP-related factors	0.0684082	depleted	0.166187	-0.119174	0.920715	FALSE
ONECUT3	6	6	Homeo domain factors	HD-CUT factors	0.0717915	enriched	0.173464	1.68427	3.21378	FALSE
ZEB1	262	951	Homeo domain factors	HD-ZF factors	0.0723757	depleted	0.173935	-0.175606	0.885395	FALSE
EBF1	118	456	Rel homology region (RHR) factors	Early B-Cell Factor-related factors	0.0754539	depleted	0.180363	-0.265975	0.831637	FALSE
HSF1	7	48	Heat shock factors	HSF factors	0.0778171	depleted	0.185023	-1.09334	0.468677	FALSE
ZSCAN4	30	139	C2H2 zinc finger factors	More than 3 adjacent zinc finger factors	0.080427	depleted	0.190216	-0.527778	0.693622	FALSE
ATF4	6	43	Basic leucine zipper factors (bZIP)	ATF-4-related factors	0.0844712	depleted	0.19873	-1.15703	0.448435	FALSE
ARNT::HIF1A	143	388	Basic helix-loop-helix factors (bHLH)::Basic helix-loop-helix factors (bHLH)	PAS domain factors::PAS domain factors	0.0860614	enriched	0.200898	0.244231	1.18446	FALSE
RXRA::VDR	19	96	Nuclear receptors with C4 zinc fingers::Nuclear receptors with C4 zinc fingers	RXR-related receptors (NR2)::Thyroid hormone receptor-related factors (NR1)	0.0862917	depleted	0.200898	-0.652763	0.636061	FALSE
SREBF2	12	68	Basic helix-loop-helix factors (bHLH)	bHLH-ZIP factors	0.0873536	depleted	0.202316	-0.818228	0.567138	FALSE
CENPB	80	319	Psq-type HTH domain		0.0899567	depleted	0.207271	-0.311212	0.805964	FALSE
ZNF24	10	15	C2H2 zinc finger factors	More than 3 adjacent zinc finger factors	0.0932498	enriched	0.213757	1.09931	2.14252	FALSE
TCF4	222	807	Basic helix-loop-helix factors (bHLH)	E2A-related factors	0.097701	depleted	0.222818	-0.177737	0.884089	FALSE
FOSL2::JUND(var.2)	17	32	Basic leucine zipper factors (bZIP)::Basic leucine zipper factors (bZIP)	Fos-related factors::Jun-related factors	0.101245	enriched	0.229728	0.771735	1.70732	FALSE
HNF4A	25	117	Nuclear receptors with C4 zinc fingers	RXR-related receptors (NR2)	0.103938	depleted	0.234561	-0.542236	0.686706	FALSE
TBX19	1	18	T-Box factors	Brachyury-related factors	0.104424	depleted	0.234561	-2.48565	0.178543	FALSE
IRF2	2	23	Tryptophan cluster factors	Interferon-regulatory factors	0.106232	depleted	0.237429	-1.83929	0.279459	FALSE
ELF3	13	70	Tryptophan cluster factors	Ets-related factors	0.108717	depleted	0.241774	-0.744571	0.596845	FALSE
FOXA1	7	45	Fork head / winged helix factors	Forkhead box (FOX) factors	0.113897	depleted	0.252039	-1.00023	0.499922	FALSE
TP63	8	49	p53 domain factors	p53-related factors	0.116766	depleted	0.257116	-0.930438	0.524699	FALSE
E2F8	45	108	Fork head / winged helix factors	E2F-related factors	0.117448	enriched	0.257349	0.421238	1.33908	FALSE
MITF	3	27	Basic helix-loop-helix factors (bHLH)	bHLH-ZIP factors	0.119932	depleted	0.26151	-1.48565	0.357087	FALSE
TEAD1	25	54	TEA domain factors	TEF-1-related factors	0.127077	enriched	0.275745	0.573241	1.48786	FALSE
TFAP4	17	84	Basic helix-loop-helix factors (bHLH)	bHLH-ZIP factors	0.128802	depleted	0.278138	-0.620582	0.650408	FALSE
NEUROG2	18	36	Basic helix-loop-helix factors (bHLH)	Tal-related factors	0.133194	enriched	0.286238	0.684272	1.60689	FALSE
NFIA	31	136	SMAD/NF-1 DNA-binding domain factors	Nuclear factor 1	0.136599	depleted	0.292152	-0.448994	0.732553	FALSE
NKX3-2	3	26	Homeo domain factors	NK-related factors	0.139438	depleted	0.295398	-1.43121	0.370821	FALSE
MEF2B	3	26	MADS box factors	Regulators of differentiation	0.139438	depleted	0.295398	-1.43121	0.370821	FALSE
NFIC::TLX1	102	387	SMAD/NF-1 DNA-binding domain factors::Homeo domain factors	Nuclear factor 1::NK-related factors	0.142213	depleted	0.299854	-0.239492	0.847043	FALSE
CUX2	8	12	Homeo domain factors	HD-CUT factors	0.147503	enriched	0.309548	1.09931	2.14252	FALSE
SIX1	13	24	Homeo domain factors	HD-SINE factors	0.150081	enriched	0.313487	0.799749	1.7408	FALSE
PRDM1	5	34	C2H2 zinc finger factors	More than 3 adjacent zinc finger factors	0.156906	depleted	0.326219	-1.08126	0.472615	FALSE
RBPJ	78	301	Rel homology region (RHR) factors	CSL-related factors	0.160929	depleted	0.333033	-0.263945	0.832807	FALSE
SRF	0	10	MADS box factors	Responders to external signals (SRF/RLM1)	0.163664	depleted	0.337134	0	1	FALSE
NOTO	9	50	Homeo domain factors	NK-related factors	0.167382	depleted	0.343209	-0.789659	0.578481	FALSE
RFX4	21	96	Fork head / winged helix factors	RFX-related factors	0.171392	depleted	0.349829	-0.508373	0.703015	FALSE
MAFK	15	73	Basic leucine zipper factors (bZIP)	Maf-related factors	0.17588	depleted	0.357357	-0.598662	0.660366	FALSE
OTX2	1	15	Homeo domain factors	Paired-related HD factors	0.176809	depleted	0.357618	-2.22262	0.214252	FALSE
SPIB	23	103	Tryptophan cluster factors	Ets-related factors	0.177971	depleted	0.358346	-0.478666	0.717641	FALSE
MYCN	81	218	Basic helix-loop-helix factors (bHLH)	bHLH-ZIP factors	0.189473	enriched	0.379796	0.255938	1.19411	FALSE
IRF3	22	98	Tryptophan cluster factors	Interferon-regulatory factors	0.197536	depleted	0.393388	-0.471006	0.721461	FALSE
NKX3-1	4	28	Homeo domain factors	NK-related factors	0.198014	depleted	0.393388	-1.12308	0.459112	FALSE
SREBF2(var.2)	0	9	Basic helix-loop-helix factors (bHLH)	bHLH-ZIP factors	0.199795	depleted	0.395169	0	1	FALSE
TEAD2	37	91	TEA domain factors	TEF-1-related factors	0.201092	enriched	0.395984	0.385931	1.3067	FALSE
NR3C2	26	112	Nuclear receptors with C4 zinc fingers	Steroid hormone receptors (NR3)	0.208714	depleted	0.40889	-0.422643	0.746057	FALSE
RORA	7	40	Nuclear receptors with C4 zinc fingers	Thyroid hormone receptor-related factors (NR1)	0.209476	depleted	0.40889	-0.830301	0.562412	FALSE
PROX1	3	23	Homeo domain factors	HD-PROS factors	0.217902	depleted	0.423487	-1.25433	0.419189	FALSE
POU5F1	9	16	Homeo domain factors	POU domain factors	0.227068	enriched	0.437523	0.854197	1.80775	FALSE
STAT1::STAT2	16	74	STAT domain factors::STAT domain factors	STAT factors::STAT factors	0.227081	depleted	0.437523	-0.525181	0.694872	FALSE
TFEC	10	51	Basic helix-loop-helix factors (bHLH)	bHLH-ZIP factors	0.230346	depleted	0.441908	-0.666225	0.630153	FALSE
VENTX	6	9	Homeo domain factors	NK-related factors	0.238711	enriched	0.455999	1.09931	2.14252	FALSE
SPI1	21	48	Tryptophan cluster factors	Ets-related factors	0.241852	enriched	0.460034	0.491627	1.40603	FALSE
SMAD3	0	8	SMAD/NF-1 DNA-binding domain factors	SMAD factors	0.244999	depleted	0.464045	0	1	FALSE
PITX3	12	24	Homeo domain factors	Paired-related HD factors	0.24611	enriched	0.464183	0.684272	1.60689	FALSE
IRF7	3	22	Tryptophan cluster factors	Interferon-regulatory factors	0.252288	depleted	0.473834	-1.1902	0.438243	FALSE
MAFF	14	65	Basic leucine zipper factors (bZIP)	Maf-related factors	0.25983	depleted	0.484044	-0.530741	0.692199	FALSE
ZBTB18	59	158	C2H2 zinc finger factors	More than 3 adjacent zinc finger factors	0.259889	enriched	0.484044	0.263134	1.20008	FALSE
HEY1	90	251	Basic helix-loop-helix factors (bHLH)	Hairy-related factors	0.268753	enriched	0.498475	0.204582	1.15235	FALSE
FOXF2	7	12	Fork head / winged helix factors	Forkhead box (FOX) factors	0.28264	enriched	0.522066	0.906665	1.87471	FALSE
SMAD2::SMAD3::SMAD4	110	397	SMAD/NF-1 DNA-binding domain factors::SMAD/NF-1 DNA-binding domain factors::SMAD/NF-1 DNA-binding domain factors	SMAD factors::SMAD factors::SMAD factors	0.295833	depleted	0.544186	-0.167363	0.890469	FALSE
GRHL2	4	25	Grainyhead domain factors	Grainyhead-related factors	0.297911	depleted	0.544534	-0.959584	0.514205	FALSE
ELF4	35	139	Tryptophan cluster factors	Ets-related factors	0.298721	depleted	0.544534	-0.305386	0.809226	FALSE
HOXB13	5	29	Homeo domain factors	HOX-related factors	0.299812	depleted	0.544534	-0.851781	0.5541	FALSE
ONECUT2	3	3	Homeo domain factors	HD-CUT factors	0.301671	enriched	0.544534	1.68427	3.21378	FALSE
HMBOX1	0	7	Homeo domain factors	POU domain factors	0.302113	depleted	0.544534	0	1	FALSE
MXI1	163	477	Basic helix-loop-helix factors (bHLH)	bHLH-ZIP factors	0.311817	enriched	0.558308	0.135155	1.09821	FALSE
E2F7	17	39	Fork head / winged helix factors	E2F-related factors	0.312253	enriched	0.558308	0.486333	1.40088	FALSE
FOXH1	6	10	Fork head / winged helix factors	Forkhead box (FOX) factors	0.316679	enriched	0.563966	0.947306	1.92827	FALSE
SCRT1	23	56	C2H2 zinc finger factors	More than 3 adjacent zinc finger factors	0.319627	enriched	0.566957	0.400479	1.31995	FALSE
FLI1	31	79	Tryptophan cluster factors	Ets-related factors	0.322582	enriched	0.569937	0.334688	1.2611	FALSE
HOXA13	2	16	Homeo domain factors	HOX-related factors	0.325985	depleted	0.573682	-1.31573	0.401723	FALSE
NFIX	148	433	SMAD/NF-1 DNA-binding domain factors	Nuclear factor 1	0.337328	enriched	0.591317	0.135502	1.09848	FALSE
JUND(var.2)	16	37	Basic leucine zipper factors (bZIP)	Jun-related factors	0.344453	enriched	0.601448	0.474819	1.38974	FALSE
HES5	134	391	Basic helix-loop-helix factors (bHLH)	Hairy-related factors	0.350961	enriched	0.610426	0.139336	1.1014	FALSE
NRL	32	83	Basic leucine zipper factors (bZIP)	Maf-related factors	0.354169	enriched	0.613619	0.309233	1.23905	FALSE
RAX	5	8	Homeo domain factors	Paired-related HD factors	0.356088	enriched	0.614562	1.0062	2.00861	FALSE
HOXB2	18	43	Homeo domain factors	HOX-related factors	0.361711	enriched	0.621866	0.427932	1.3453	FALSE
SNAI2	182	632	C2H2 zinc finger factors	More than 3 adjacent zinc finger factors	0.363836	depleted	0.623121	-0.111714	0.925488	FALSE
ETV5	40	153	Tryptophan cluster factors	Ets-related factors	0.366134	depleted	0.624663	-0.251188	0.840204	FALSE
XBP1	28	111	Basic leucine zipper factors (bZIP)	XBP-1-related factors	0.368476	depleted	0.626091	-0.302789	0.810684	FALSE
FOSB::JUN	14	32	Basic leucine zipper factors (bZIP)::Basic leucine zipper factors (bZIP)	Fos-related factors::Jun-related factors	0.369772	enriched	0.626091	0.491627	1.40603	FALSE
EVX1	15	35	Homeo domain factors	HOX-related factors	0.380321	enriched	0.636717	0.46188	1.37734	FALSE
EVX2	15	35	Homeo domain factors	HOX-related factors	0.380321	enriched	0.636717	0.46188	1.37734	FALSE
SIX2	15	35	Homeo domain factors	HD-SINE factors	0.380321	enriched	0.636717	0.46188	1.37734	FALSE
FOXO3	11	24	Fork head / winged helix factors	Forkhead box (FOX) factors	0.382755	enriched	0.6375	0.558741	1.47298	FALSE
FOSL2::JUN(var.2)	5	27	Basic leucine zipper factors (bZIP)::Basic leucine zipper factors (bZIP)	Fos-related factors::Jun-related factors	0.383641	depleted	0.6375	-0.748687	0.595145	FALSE
Pax6	16	38	Paired box factors	Paired plus homeo domain	0.38947	enriched	0.64479	0.436345	1.35317	FALSE
EMX1	8	38	Homeo domain factors	NK-related factors	0.401489	depleted	0.662235	-0.563655	0.676586	FALSE
E2F1	11	49	Fork head / winged helix factors	E2F-related factors	0.404816	depleted	0.665267	-0.471006	0.721461	FALSE
RUNX2	16	67	Runt domain factors	Runt-related factors	0.407942	depleted	0.667948	-0.381817	0.76747	FALSE
ERF	32	123	Tryptophan cluster factors	Ets-related factors	0.415855	depleted	0.678421	-0.258242	0.836106	FALSE
MEOX1	14	33	Homeo domain factors	HOX-related factors	0.420341	enriched	0.683245	0.447233	1.36342	FALSE
IRF4	6	30	Tryptophan cluster factors	Interferon-regulatory factors	0.422782	depleted	0.684723	-0.637656	0.642756	FALSE
NR3C1	27	105	Nuclear receptors with C4 zinc fingers	Steroid hormone receptors (NR3)	0.43148	depleted	0.696287	-0.275086	0.826401	FALSE
VDR	11	25	Nuclear receptors with C4 zinc fingers	Thyroid hormone receptor-related factors (NR1)	0.44275	enriched	0.709941	0.499848	1.41406	FALSE
RARA	8	37	Nuclear receptors with C4 zinc fingers	Thyroid hormone receptor-related factors (NR1)	0.444328	depleted	0.709941	-0.525181	0.694872	FALSE
FOSL1::JUN(var.2)	3	18	Basic leucine zipper factors (bZIP)::Basic leucine zipper factors (bZIP)	Fos-related factors::Jun-related factors	0.446294	depleted	0.709941	-0.90069	0.53563	FALSE
JUNB(var.2)	3	18	Basic leucine zipper factors (bZIP)	Jun-related factors	0.446294	depleted	0.709941	-0.90069	0.53563	FALSE
HOXB3	19	48	Homeo domain factors	HOX-related factors	0.454176	enriched	0.71906	0.347237	1.27212	FALSE
FOXC1	3	4	Fork head / winged helix factors	Forkhead box (FOX) factors	0.456039	enriched	0.71906	1.26923	2.41034	FALSE
LHX2	7	33	Homeo domain factors	HD-LIM factors	0.458269	depleted	0.71906	-0.552767	0.681711	FALSE
JUN	20	51	Basic leucine zipper factors (bZIP)	Jun-related factors	0.458461	enriched	0.71906	0.333775	1.26031	FALSE
ZNF282	34	128	C2H2 zinc finger factors	More than 3 adjacent zinc finger factors	0.463485	depleted	0.723472	-0.228265	0.853661	FALSE
TCF3	222	755	Basic helix-loop-helix factors (bHLH)	E2A-related factors	0.464511	depleted	0.723472	-0.0816449	0.94498	FALSE
GSX1	6	29	Homeo domain factors	HOX-related factors	0.47243	depleted	0.733251	-0.588746	0.66492	FALSE
FOSB::JUNB(var.2)	5	25	Basic leucine zipper factors (bZIP)::Basic leucine zipper factors (bZIP)	Fos-related factors::Jun-related factors	0.48656	depleted	0.752568	-0.637656	0.642756	FALSE
RELB	119	354	Rel homology region (RHR) factors	NF-kappaB-related factors	0.49152	enriched	0.754006	0.111484	1.08034	FALSE
CEBPB	10	23	Basic leucine zipper factors (bZIP)	C/EBP-related	0.494236	enriched	0.754006	0.482638	1.3973	FALSE
CEBPD	10	23	Basic leucine zipper factors (bZIP)	C/EBP-related	0.494236	enriched	0.754006	0.482638	1.3973	FALSE
CEBPE	10	23	Basic leucine zipper factors (bZIP)	C/EBP-related	0.494236	enriched	0.754006	0.482638	1.3973	FALSE
TAL1::TCF3	23	61	Basic helix-loop-helix factors (bHLH)::Basic helix-loop-helix factors (bHLH)	Tal-related factors::E2A-related factors	0.509225	enriched	0.77423	0.277097	1.21175	FALSE
ETV4	35	97	Tryptophan cluster factors	Ets-related factors	0.513958	enriched	0.778776	0.213642	1.15961	FALSE
MAFG	25	95	Basic leucine zipper factors (bZIP)	Maf-related factors	0.52092	depleted	0.78666	-0.241727	0.845732	FALSE
BCL6B	13	32	C2H2 zinc finger factors	More than 3 adjacent zinc finger factors	0.522772	enriched	0.786798	0.384712	1.3056	FALSE
EHF	21	81	Tryptophan cluster factors	Ets-related factors	0.527186	depleted	0.789731	-0.26326	0.833203	FALSE
SOX21	4	7	High-mobility group (HMG) domain factors	SOX-related factors	0.528254	enriched	0.789731	0.876917	1.83645	FALSE
SPIC	16	41	Tryptophan cluster factors	Ets-related factors	0.538168	enriched	0.799229	0.32672	1.25416	FALSE
TWIST1	43	122	Basic helix-loop-helix factors (bHLH)	Tal-related factors	0.538184	enriched	0.799229	0.1798	1.13273	FALSE
ZNF143	56	162	C2H2 zinc finger factors	More than 3 adjacent zinc finger factors	0.545571	enriched	0.807517	0.151777	1.11094	FALSE
MYC	169	514	Basic helix-loop-helix factors (bHLH)	bHLH-ZIP factors	0.553607	enriched	0.816708	0.079527	1.05667	FALSE
ESR2	187	632	Nuclear receptors with C4 zinc fingers	Steroid hormone receptors (NR3)	0.56054	depleted	0.823854	-0.0726142	0.950913	FALSE
HSF2	7	31	Heat shock factors	HSF factors	0.562138	depleted	0.823854	-0.462569	0.725693	FALSE
FOXG1	5	10	Fork head / winged helix factors	Forkhead box (FOX) factors	0.568022	enriched	0.829294	0.684272	1.60689	FALSE
RUNX3	17	66	Runt domain factors	Runt-related factors	0.56956	depleted	0.829294	-0.272659	0.827792	FALSE
GSC	13	33	Homeo domain factors	Paired-related HD factors	0.582506	enriched	0.845114	0.340318	1.26604	FALSE
MEF2A	3	16	MADS box factors	Regulators of differentiation	0.586097	depleted	0.845114	-0.730765	0.602584	FALSE
MEF2D	3	16	MADS box factors	Regulators of differentiation	0.586097	depleted	0.845114	-0.730765	0.602584	FALSE
SCRT2	28	78	C2H2 zinc finger factors	More than 3 adjacent zinc finger factors	0.590981	enriched	0.846597	0.206225	1.15367	FALSE
CDX2	6	13	Homeo domain factors	HOX-related factors	0.592807	enriched	0.846597	0.568795	1.48328	FALSE
BARX1	6	13	Homeo domain factors	NK-related factors	0.592807	enriched	0.846597	0.568795	1.48328	FALSE
NR1H2::RXRA	19	51	Nuclear receptors with C4 zinc fingers::Nuclear receptors with C4 zinc fingers	Thyroid hormone receptor-related factors (NR1)::RXR-related receptors (NR2)	0.594871	enriched	0.846839	0.259774	1.19729	FALSE
FOXP2	7	16	Fork head / winged helix factors	Forkhead box (FOX) factors	0.609342	enriched	0.863847	0.491627	1.40603	FALSE
ATF7	5	23	Basic leucine zipper factors (bZIP)	Jun-related factors	0.610684	depleted	0.863847	-0.517362	0.698648	FALSE
FOXC2	3	5	Fork head / winged helix factors	Forkhead box (FOX) factors	0.61708	enriched	0.870142	0.947306	1.92827	FALSE
ERG	29	82	Tryptophan cluster factors	Ets-related factors	0.628763	enriched	0.883827	0.184701	1.13658	FALSE
ZNF410	4	19	C2H2 zinc finger factors	More than 3 adjacent zinc finger factors	0.638297	depleted	0.894183	-0.563655	0.676586	FALSE
JDP2(var.2)	12	31	Basic leucine zipper factors (bZIP)	Fos-related factors	0.641863	enriched	0.894183	0.315038	1.24404	FALSE
HOXA2	21	58	Homeo domain factors	HOX-related factors	0.642131	enriched	0.894183	0.218609	1.16361	FALSE
GRHL1	3	15	Grainyhead domain factors	Grainyhead-related factors	0.668774	depleted	0.928392	-0.637656	0.642756	FALSE
RUNX1	41	144	Runt domain factors	Runt-related factors	0.675713	depleted	0.92969	-0.128101	0.915035	FALSE
CUX1	5	11	Homeo domain factors	HD-CUT factors	0.679374	enriched	0.92969	0.546769	1.46081	FALSE
ALX3	5	22	Homeo domain factors	Paired-related HD factors	0.681104	depleted	0.92969	-0.453231	0.730405	FALSE
FOSL2::JUNB(var.2)	5	22	Basic leucine zipper factors (bZIP)::Basic leucine zipper factors (bZIP)	Fos-related factors::Jun-related factors	0.681104	depleted	0.92969	-0.453231	0.730405	FALSE
MSX2	6	14	Homeo domain factors	NK-related factors	0.691792	enriched	0.92969	0.46188	1.37734	FALSE
SOX4	6	14	High-mobility group (HMG) domain factors	SOX-related factors	0.691792	enriched	0.92969	0.46188	1.37734	FALSE
HNF4G	33	96	Nuclear receptors with C4 zinc fingers	RXR-related receptors (NR2)	0.694854	enriched	0.92969	0.143704	1.10474	FALSE
MLX	17	63	Basic helix-loop-helix factors (bHLH)	bHLH-ZIP factors	0.695406	depleted	0.92969	-0.205545	0.867211	FALSE
GBX1	7	17	Homeo domain factors	HOX-related factors	0.699272	enriched	0.92969	0.404164	1.32332	FALSE
FOXD1	8	20	Fork head / winged helix factors	Forkhead box (FOX) factors	0.70375	enriched	0.92969	0.362344	1.28551	FALSE
FOXL1	8	20	Fork head / winged helix factors	Forkhead box (FOX) factors	0.70375	enriched	0.92969	0.362344	1.28551	FALSE
FOXI1	8	20	Fork head / winged helix factors	Forkhead box (FOX) factors	0.70375	enriched	0.92969	0.362344	1.28551	FALSE
FOXD2	8	20	Fork head / winged helix factors	Forkhead box (FOX) factors	0.70375	enriched	0.92969	0.362344	1.28551	FALSE
FOXO4	8	20	Fork head / winged helix factors	Forkhead box (FOX) factors	0.70375	enriched	0.92969	0.362344	1.28551	FALSE
FOXO6	8	20	Fork head / winged helix factors	Forkhead box (FOX) factors	0.70375	enriched	0.92969	0.362344	1.28551	FALSE
FOXP3	8	20	Fork head / winged helix factors	Forkhead box (FOX) factors	0.70375	enriched	0.92969	0.362344	1.28551	FALSE
BHLHE41	30	87	Basic helix-loop-helix factors (bHLH)	Hairy-related factors	0.705067	enriched	0.92969	0.148219	1.1082	FALSE
FIGLA	45	156	Basic helix-loop-helix factors (bHLH)	Tal-related factors	0.713121	depleted	0.937544	-0.109277	0.927053	FALSE
TGIF2	37	109	Homeo domain factors	TALE-type homeo domain factors	0.717168	enriched	0.939693	0.125541	1.09092	FALSE
PPARG	27	96	Nuclear receptors with C4 zinc fingers	Thyroid hormone receptor-related factors (NR1)	0.71896	depleted	0.939693	-0.145803	0.903876	FALSE
EN2	9	35	Homeo domain factors	NK-related factors	0.738127	depleted	0.959547	-0.275086	0.826401	FALSE
HOXC11	2	3	Homeo domain factors	HOX-related factors	0.741761	enriched	0.959547	1.09931	2.14252	FALSE
SOX8	2	3	High-mobility group (HMG) domain factors	SOX-related factors	0.741761	enriched	0.959547	1.09931	2.14252	FALSE
ELK1	29	102	Tryptophan cluster factors	Ets-related factors	0.743023	depleted	0.959547	-0.130172	0.913722	FALSE
MAX::MYC	47	141	Basic helix-loop-helix factors (bHLH)::Basic helix-loop-helix factors (bHLH)	bHLH-ZIP factors::bHLH-ZIP factors	0.744884	enriched	0.959547	0.0993096	1.07126	FALSE
BATF3	18	51	Basic leucine zipper factors (bZIP)	B-ATF-related factors	0.749556	enriched	0.962792	0.181772	1.13428	FALSE
USF1	27	95	Basic helix-loop-helix factors (bHLH)	bHLH-ZIP factors	0.756128	depleted	0.966951	-0.130696	0.913391	FALSE
EMX2	5	21	Homeo domain factors	NK-related factors	0.75712	depleted	0.966951	-0.386117	0.765186	FALSE
KLF13	48	164	C2H2 zinc finger factors	Three-zinc finger KrÃ¼ppel-related factors	0.768178	depleted	0.975732	-0.0883174	0.940619	FALSE
DUX4	0	3	Homeo domain factors	Paired-related HD factors	0.773604	depleted	0.975732	0	1	FALSE
POU2F2	0	3	Homeo domain factors	POU domain factors	0.773604	depleted	0.975732	0	1	FALSE
POU4F3	0	3	Homeo domain factors	POU domain factors	0.773604	depleted	0.975732	0	1	FALSE
MYF6	8	31	Basic helix-loop-helix factors (bHLH)	MyoD / ASC-related factors	0.775857	depleted	0.975732	-0.269924	0.829363	FALSE
CEBPG	11	30	Basic leucine zipper factors (bZIP)	C/EBP-related	0.777093	enriched	0.975732	0.236813	1.17839	FALSE
NKX2-8	10	27	Homeo domain factors	NK-related factors	0.78075	enriched	0.977578	0.251313	1.19029	FALSE
CDX1	4	9	Homeo domain factors	HOX-related factors	0.786695	enriched	0.981064	0.514347	1.42835	FALSE
GBX2	7	18	Homeo domain factors	HOX-related factors	0.789589	enriched	0.981064	0.321702	1.2498	FALSE
FOSL1::JUND(var.2)	6	24	Basic leucine zipper factors (bZIP)::Basic leucine zipper factors (bZIP)	Fos-related factors::Jun-related factors	0.790119	depleted	0.981064	-0.315728	0.803446	FALSE
IRF1	19	55	Tryptophan cluster factors	Interferon-regulatory factors	0.797036	enriched	0.986912	0.15084	1.11022	FALSE
SREBF1	34	102	Basic helix-loop-helix factors (bHLH)	bHLH-ZIP factors	0.803992	enriched	0.992775	0.0993096	1.07126	FALSE
PBX2	13	47	Homeo domain factors	TALE-type homeo domain factors	0.822166	depleted	1	-0.169877	0.888918	FALSE
RXRB	21	62	Nuclear receptors with C4 zinc fingers	RXR-related receptors (NR2)	0.835413	enriched	1	0.122393	1.08854	FALSE
MYBL2	5	20	Tryptophan cluster factors	Myb/SANT domain factors	0.838582	depleted	1	-0.315728	0.803446	FALSE
MSC	59	197	Basic helix-loop-helix factors (bHLH)	Tal-related factors	0.852525	depleted	1	-0.0551367	0.962503	FALSE
NR2F1	62	192	Nuclear receptors with C4 zinc fingers	RXR-related receptors (NR2)	0.855634	enriched	1	0.0535059	1.03778	FALSE
POU6F1	3	13	Homeo domain factors	POU domain factors	0.861339	depleted	1	-0.431205	0.741642	FALSE
LHX6	3	13	Homeo domain factors	HD-LIM factors	0.861339	depleted	1	-0.431205	0.741642	FALSE
MIXL1	3	13	Homeo domain factors	Paired-related HD factors	0.861339	depleted	1	-0.431205	0.741642	FALSE
PKNOX2	37	113	Homeo domain factors	TALE-type homeo domain factors	0.861702	enriched	1	0.0735465	1.0523	FALSE
PPARA::RXRA	24	72	Nuclear receptors with C4 zinc fingers::Nuclear receptors with C4 zinc fingers	Thyroid hormone receptor-related factors (NR1)::RXR-related receptors (NR2)	0.862819	enriched	1	0.0993096	1.07126	FALSE
FOXK2	8	22	Fork head / winged helix factors	Forkhead box (FOX) factors	0.870142	enriched	1	0.22484	1.16865	FALSE
TGIF1	29	88	Homeo domain factors	TALE-type homeo domain factors	0.872715	enriched	1	0.0828215	1.05909	FALSE
CEBPA	7	19	Basic leucine zipper factors (bZIP)	C/EBP-related	0.879055	enriched	1	0.2437	1.18402	FALSE
MEF2C	7	19	MADS box factors	Regulators of differentiation	0.879055	enriched	1	0.2437	1.18402	FALSE
ETS1	38	117	Tryptophan cluster factors	Ets-related factors	0.891843	enriched	1	0.0618349	1.04379	FALSE
FOXK1	7	26	Fork head / winged helix factors	Forkhead box (FOX) factors	0.891988	depleted	1	-0.208813	0.865249	FALSE
ETV1	32	98	Tryptophan cluster factors	Ets-related factors	0.893062	enriched	1	0.0695622	1.0494	FALSE
BATF::JUN	13	38	Basic leucine zipper factors (bZIP)::Basic leucine zipper factors (bZIP)	B-ATF-related factors::Jun-related factors	0.895874	enriched	1	0.136784	1.09945	FALSE
MLXIPL	18	62	Basic helix-loop-helix factors (bHLH)	bHLH-ZIP factors	0.898204	depleted	1	-0.0999992	0.933033	FALSE
PKNOX1	41	127	Homeo domain factors	TALE-type homeo domain factors	0.908337	enriched	1	0.0531394	1.03752	FALSE
IRF9	8	29	Tryptophan cluster factors	Interferon-regulatory factors	0.913499	depleted	1	-0.173709	0.886561	FALSE
SRY	3	7	High-mobility group (HMG) domain factors	SOX-related factors	0.924861	enriched	1	0.46188	1.37734	FALSE
TEF	3	7	TEA domain factors	TEF-1-related factors	0.924861	enriched	1	0.46188	1.37734	FALSE
POU6F2	9	32	Homeo domain factors	POU domain factors	0.932616	depleted	1	-0.145803	0.903876	FALSE
RHOXF1	26	80	Homeo domain factors	Paired-related HD factors	0.937066	enriched	1	0.0627837	1.04448	FALSE
GATA2	2	9	Other C4 zinc finger-type factors	GATA-type zinc fingers	0.937564	depleted	1	-0.485653	0.714174	FALSE
ISL2	2	9	Homeo domain factors	HD-LIM factors	0.937564	depleted	1	-0.485653	0.714174	FALSE
POU4F2	2	4	Homeo domain factors	POU domain factors	0.941772	enriched	1	0.684272	1.60689	FALSE
ELF5	23	77	Tryptophan cluster factors	Ets-related factors	0.956411	depleted	1	-0.0589525	0.959961	FALSE
RORB	18	55	Nuclear receptors with C4 zinc fingers	Thyroid hormone receptor-related factors (NR1)	0.961298	enriched	1	0.0728374	1.05178	FALSE
LBX2	7	20	Homeo domain factors	NK-related factors	0.966606	enriched	1	0.169699	1.12482	FALSE
SOX15	7	20	High-mobility group (HMG) domain factors	SOX-related factors	0.966606	enriched	1	0.169699	1.12482	FALSE
MYB	12	41	Tryptophan cluster factors	Myb/SANT domain factors	0.979926	depleted	1	-0.0883174	0.940619	FALSE
CREB1	22	73	Basic leucine zipper factors (bZIP)	CREB-related factors	0.991297	depleted	1	-0.0461208	0.968537	FALSE
TP53	41	134	p53 domain factors	p53-related factors	0.995663	depleted	1	-0.0242651	0.983321	FALSE
ZNF384	4	15	C2H2 zinc finger factors	More than 3 adjacent zinc finger factors	0.996119	depleted	1	-0.222619	0.857009	FALSE
POU4F1	0	2	Homeo domain factors	POU domain factors	1	depleted	1	0	1	FALSE
BSX	0	2	Homeo domain factors	NK-related factors	1	depleted	1	0	1	FALSE
POU1F1	0	1	Homeo domain factors	POU domain factors	1	depleted	1	0	1	FALSE
POU3F4	0	1	Homeo domain factors	POU domain factors	1	depleted	1	0	1	FALSE
POU5F1B	0	1	Homeo domain factors	POU domain factors	1	depleted	1	0	1	FALSE
DUXA	0	1	Homeo domain factors	Paired-related HD factors	1	depleted	1	0	1	FALSE
HOXC10	0	1	Homeo domain factors	HOX-related factors	1	depleted	1	0	1	FALSE
GATA5	1	5	Other C4 zinc finger-type factors	GATA-type zinc fingers	1	depleted	1	-0.637656	0.642756	FALSE
GATA6	1	5	Other C4 zinc finger-type factors	GATA-type zinc fingers	1	depleted	1	-0.637656	0.642756	FALSE
NFIL3	1	2	Basic leucine zipper factors (bZIP)	C/EBP-related	1	enriched	1	0.684272	1.60689	FALSE
HNF1B	1	2	Homeo domain factors	POU domain factors	1	enriched	1	0.684272	1.60689	FALSE
HLF	3	11	Basic leucine zipper factors (bZIP)	C/EBP-related	1	depleted	1	-0.190197	0.876486	FALSE
DBP	3	8	Basic leucine zipper factors (bZIP)	C/EBP-related	1	enriched	1	0.269235	1.20517	FALSE
FOXB1	3	8	Fork head / winged helix factors	Forkhead box (FOX) factors	1	enriched	1	0.269235	1.20517	FALSE
HESX1	3	8	Homeo domain factors	Paired-related HD factors	1	enriched	1	0.269235	1.20517	FALSE
DMRT3	1	4	DM-type intertwined zinc finger factors	DMRT	1	depleted	1	-0.315728	0.803446	FALSE
HOXD12	1	4	Homeo domain factors	HOX-related factors	1	depleted	1	-0.315728	0.803446	FALSE
MSX1	5	14	Homeo domain factors	NK-related factors	1	enriched	1	0.198845	1.14778	FALSE
HOXD13	5	14	Homeo domain factors	HOX-related factors	1	enriched	1	0.198845	1.14778	FALSE
SHOX	4	14	Homeo domain factors	Paired-related HD factors	1	depleted	1	-0.123083	0.918223	FALSE
ISX	4	14	Homeo domain factors	Paired-related HD factors	1	depleted	1	-0.123083	0.918223	FALSE
LHX9	4	14	Homeo domain factors	HD-LIM factors	1	depleted	1	-0.123083	0.918223	FALSE
PRRX1	4	14	Homeo domain factors	Paired-related HD factors	1	depleted	1	-0.123083	0.918223	FALSE
RAX2	4	14	Homeo domain factors	Paired-related HD factors	1	depleted	1	-0.123083	0.918223	FALSE
UNCX	4	14	Homeo domain factors	Paired-related HD factors	1	depleted	1	-0.123083	0.918223	FALSE
T	8	27	T-Box factors	Brachyury-related factors	1	depleted	1	-0.0706154	0.952232	FALSE
FOXP1	8	27	Fork head / winged helix factors	Forkhead box (FOX) factors	1	depleted	1	-0.0706154	0.952232	FALSE
HSF4	17	55	Heat shock factors	HSF factors	1	depleted	1	-0.00962478	0.993351	FALSE
HOXA5	8	24	Homeo domain factors	HOX-related factors	1	enriched	1	0.0993096	1.07126	FALSE
DLX6	3	10	Homeo domain factors	NK-related factors	1	depleted	1	-0.0526935	0.964135	FALSE
HOXC13	3	10	Homeo domain factors	HOX-related factors	1	depleted	1	-0.0526935	0.964135	FALSE
MYBL1	6	18	Tryptophan cluster factors	Myb/SANT domain factors	1	enriched	1	0.0993096	1.07126	FALSE
ELF1	36	115	Tryptophan cluster factors	Ets-related factors	1	enriched	1	0.00870704	1.00605	FALSE
OTX1	8	26	Homeo domain factors	Paired-related HD factors	1	depleted	1	-0.0161676	0.988856	FALSE
ESX1	3	9	Homeo domain factors	Paired-related HD factors	1	enriched	1	0.0993096	1.07126	FALSE
PAX4	4	13	Paired box factors	Paired plus homeo domain	1	depleted	1	-0.0161676	0.988856	FALSE
HEY2	154	497	Basic helix-loop-helix factors (bHLH)	Hairy-related factors	1	depleted	1	-0.00604341	0.99582	FALSE
USF2	44	143	Basic helix-loop-helix factors (bHLH)	bHLH-ZIP factors	1	depleted	1	-0.0161676	0.988856	FALSE
GATA3	5	18	Other C4 zinc finger-type factors	GATA-type zinc fingers	1	depleted	1	-0.163725	0.892717	FALSE
TCF7L1	5	18	High-mobility group (HMG) domain factors	TCF-7-related factors	1	depleted	1	-0.163725	0.892717	FALSE
FEV	25	79	Tryptophan cluster factors	Ets-related factors	1	enriched	1	0.0243475	1.01702	FALSE
FOS::JUN(var.2)	9	28	Basic leucine zipper factors (bZIP)::Basic leucine zipper factors (bZIP)	Fos-related factors::Jun-related factors	1	enriched	1	0.0468422	1.033	FALSE
EN1	6	21	Homeo domain factors	NK-related factors	1	depleted	1	-0.123083	0.918223	FALSE
LBX1	6	21	Homeo domain factors	NK-related factors	1	depleted	1	-0.123083	0.918223	FALSE
VSX1	6	21	Homeo domain factors	Paired-related HD factors	1	depleted	1	-0.123083	0.918223	FALSE
VSX2	6	21	Homeo domain factors	Paired-related HD factors	1	depleted	1	-0.123083	0.918223	FALSE
LEF1	6	21	High-mobility group (HMG) domain factors	TCF-7-related factors	1	depleted	1	-0.123083	0.918223	FALSE
ELK3	28	90	Tryptophan cluster factors	Ets-related factors	1	depleted	1	-0.000226081	0.999843	FALSE
RXRG	20	64	Nuclear receptors with C4 zinc fingers	RXR-related receptors (NR2)	1	enriched	1	0.00620019	1.00431	FALSE
