# Supplementary material for: DNA Methylation Regulates Transcription Factor-Specific Neurodevelopmental but Not Sexually Dimorphic Gene Expression Dynamics in Zebra Finch Telencephalon
Source: Front Cell Dev Biol. 2021 Mar 19;9:583555. doi: 10.3389/fcell.2021.583555 (PMC8017237; doi:10.3389/fcell.2021.583555)
Supplement: Supplementary Data Sheet 3 — TFBS analysis of dosage compensated genes (from birth or acquired), as compared to non-dosage compensated genes. [file Data_Sheet_3.XLSX]

## Sheet: Table S18
Table S18: TFBS analysis for genes that are dosage compensated from birth or throughout the birds life span, compared to non-dosage compensated genes
Columns contain the following information from left to right: “TF”: transcription factor symbol, “Counts”: the number of TFBS found in promotor regions of genes that are dosage compensated from birth, “Counts_ns”: the number of TFBS found in promoter regions of non-dosage compensated genes, “class”: TF class, “family”: TF family, “p-value”: p-value for chi-squared test, “direction”: whether the T…

## Sheet: JASPAR_TF_dosage_from birth
TF	Counts (n=78)	Counts_ns (n=132)	class	family	p_value	direction	FDR	logFC	FC	filter
RXRG	11	54	Nuclear receptors with C4 zinc fingers	RXR-related receptors (NR2)	9.39518e-05	depleted	0.0253996	-1.53646	0.344729	TRUE
PLAG1	30	88	C2H2 zinc finger factors	More than 3 adjacent zinc finger factors	0.000124764	depleted	0.0253996	-0.793549	0.576923	FALSE
ERF	6	41	Tryptophan cluster factors	Ets-related factors	0.000173705	depleted	0.0253996	-2.0136	0.247655	TRUE
ERG	5	37	Tryptophan cluster factors	Ets-related factors	0.000310843	depleted	0.0253996	-2.12853	0.22869	TRUE
STAT1::STAT2	38	98	STAT domain factors::STAT domain factors	STAT factors::STAT factors	0.000328452	depleted	0.0253996	-0.60779	0.656201	FALSE
RXRB	13	55	Nuclear receptors with C4 zinc fingers	RXR-related receptors (NR2)	0.000332745	depleted	0.0253996	-1.32193	0.4	TRUE
E2F6	35	91	Fork head / winged helix factors	E2F-related factors	0.000987069	depleted	0.0645825	-0.61952	0.650888	FALSE
RARA::RXRG	22	68	Nuclear receptors with C4 zinc fingers::Nuclear receptors with C4 zinc fingers	Thyroid hormone receptor-related factors (NR1)::RXR-related receptors (NR2)	0.00161111	depleted	0.0761018	-0.869039	0.547511	FALSE
ZBTB18	32	85	C2H2 zinc finger factors	More than 3 adjacent zinc finger factors	0.0016308	depleted	0.0761018	-0.650399	0.637104	FALSE
FLI1	6	35	Tryptophan cluster factors	Ets-related factors	0.00166161	depleted	0.0761018	-1.78533	0.29011	TRUE
ZBTB7A	23	69	C2H2 zinc finger factors	More than 3 adjacent zinc finger factors	0.00212826	depleted	0.0886129	-0.825971	0.564103	FALSE
ETS1	10	43	Tryptophan cluster factors	Ets-related factors	0.002527	depleted	0.0932899	-1.34534	0.39356	TRUE
HOXB13	18	59	Homeo domain factors	HOX-related factors	0.00276012	depleted	0.0932899	-0.953726	0.516297	FALSE
GLI2	13	49	C2H2 zinc finger factors	More than 3 adjacent zinc finger factors	0.00285166	depleted	0.0932899	-1.15528	0.44898	TRUE
SOX4	29	78	High-mobility group (HMG) domain factors	SOX-related factors	0.00343121	depleted	0.0985077	-0.668429	0.629191	FALSE
TFDP1	25	71	Fork head / winged helix factors	E2F-related factors	0.00359224	depleted	0.0985077	-0.746899	0.595883	FALSE
RREB1	44	101	C2H2 zinc finger factors	Factors with multiple dispersed zinc fingers	0.00384432	depleted	0.0985077	-0.439788	0.737243	FALSE
ETV2	12	46	Tryptophan cluster factors	Ets-related factors	0.00387148	depleted	0.0985077	-1.17961	0.441472	TRUE
EGR3	30	79	C2H2 zinc finger factors	Three-zinc finger KrÃ¼ppel-related factors	0.00431316	depleted	0.10397	-0.637898	0.642648	FALSE
SP4	25	70	C2H2 zinc finger factors	Three-zinc finger KrÃ¼ppel-related factors	0.00498709	depleted	0.114204	-0.726435	0.604396	FALSE
MZF1(var.2)	27	73	C2H2 zinc finger factors	More than 3 adjacent zinc finger factors	0.00582582	depleted	0.121283	-0.675945	0.625922	FALSE
TFAP2B(var.3)	27	73	Basic helix-span-helix factors (bHSH)	AP-2	0.00582582	depleted	0.121283	-0.675945	0.625922	FALSE
EGR1	22	64	C2H2 zinc finger factors	Three-zinc finger Kruppel-related factors	0.00609835	depleted	0.121437	-0.781576	0.581731	FALSE
ONECUT1	6	31	Homeo domain factors	HD-CUT factors	0.00662622	depleted	0.124588	-1.61024	0.327543	FALSE
GATA3	10	40	Other C4 zinc finger-type factors	GATA-type zinc fingers	0.00680067	depleted	0.124588	-1.24101	0.423077	FALSE
SP8	38	90	C2H2 zinc finger factors	Three-zinc finger KrÃ¼ppel-related factors	0.00811589	depleted	0.142964	-0.484934	0.71453	FALSE
PROP1	18	55	Homeo domain factors	Paired-related HD factors	0.00978308	depleted	0.158247	-0.852443	0.553846	FALSE
TWIST1	28	73	Basic helix-loop-helix factors (bHLH)	Tal-related factors	0.00997687	depleted	0.158247	-0.623478	0.649104	FALSE
GABPA	17	53	Tryptophan cluster factors	Ets-related factors	0.01002	depleted	0.158247	-0.881466	0.542816	FALSE
ELF4	12	42	Tryptophan cluster factors	Ets-related factors	0.0135336	depleted	0.206613	-1.04836	0.483516	FALSE
CDX1	22	61	Homeo domain factors	HOX-related factors	0.0149784	depleted	0.212885	-0.712314	0.61034	FALSE
CUX2	3	21	Homeo domain factors	HD-CUT factors	0.0150831	depleted	0.212885	-2.04836	0.241758	FALSE
YY2	8	33	C2H2 zinc finger factors	More than 3 adjacent zinc finger factors	0.0153389	depleted	0.212885	-1.2854	0.410256	FALSE
ASCL1	53	110	Basic helix-loop-helix factors (bHLH)	MyoD / ASC-related factors	0.0158113	depleted	0.212988	-0.294447	0.815385	FALSE
ELK4	19	55	Tryptophan cluster factors	Ets-related factors	0.0169685	depleted	0.213081	-0.77444	0.584615	FALSE
ONECUT2	10	37	Homeo domain factors	HD-CUT factors	0.0171316	depleted	0.213081	-1.12853	0.45738	FALSE
EWSR1-FLI1	51	107	Tryptophan cluster factors	Ets-related factors	0.0174269	depleted	0.213081	-0.31005	0.806614	FALSE
ZNF282	24	64	C2H2 zinc finger factors	More than 3 adjacent zinc finger factors	0.0178192	depleted	0.213081	-0.656046	0.634615	FALSE
GCM2	13	43	GCM domain factors	GCM factors	0.0183954	depleted	0.213081	-0.966833	0.511628	FALSE
CTCFL	41	92	C2H2 zinc finger factors	More than 3 adjacent zinc finger factors	0.0192185	depleted	0.213081	-0.407018	0.754181	FALSE
HOXA13	22	60	Homeo domain factors	HOX-related factors	0.0198391	depleted	0.213081	-0.688467	0.620513	FALSE
ZIC3	33	79	C2H2 zinc finger factors	More than 3 adjacent zinc finger factors	0.0204075	depleted	0.213081	-0.500395	0.706913	FALSE
E2F4	26	67	Fork head / winged helix factors	E2F-related factors	0.0207534	depleted	0.213081	-0.606658	0.656716	FALSE
CENPB	8	32	Psq-type HTH domain		0.0207735	depleted	0.213081	-1.24101	0.423077	FALSE
CEBPG	3	20	Basic leucine zipper factors (bZIP)	C/EBP-related	0.0211025	depleted	0.213081	-1.97797	0.253846	FALSE
ELF5	19	54	Tryptophan cluster factors	Ets-related factors	0.0224006	depleted	0.213081	-0.747968	0.595442	FALSE
SP1	44	96	C2H2 zinc finger factors	Three-zinc finger KrÃ¼ppel-related factors	0.0230756	depleted	0.213081	-0.366539	0.775641	FALSE
USF1	17	50	Basic helix-loop-helix factors (bHLH)	bHLH-ZIP factors	0.0236366	depleted	0.213081	-0.797401	0.575385	FALSE
MAX::MYC	11	38	Basic helix-loop-helix factors (bHLH)::Basic helix-loop-helix factors (bHLH)	bHLH-ZIP factors::bHLH-ZIP factors	0.0236762	depleted	0.213081	-1.0295	0.489879	FALSE
TFAP2C(var.3)	28	70	Basic helix-span-helix factors (bHSH)	AP-2	0.0237273	depleted	0.213081	-0.562936	0.676923	FALSE
SOX15	28	70	High-mobility group (HMG) domain factors	SOX-related factors	0.0237273	depleted	0.213081	-0.562936	0.676923	FALSE
SP3	39	88	C2H2 zinc finger factors	Three-zinc finger KrÃ¼ppel-related factors	0.02503	depleted	0.220457	-0.415037	0.75	FALSE
HOXD13	20	55	Homeo domain factors	HOX-related factors	0.0283191	depleted	0.24472	-0.70044	0.615385	FALSE
TFAP4	28	69	Basic helix-loop-helix factors (bHLH)	bHLH-ZIP factors	0.031032	depleted	0.26252	-0.542178	0.686734	FALSE
NFKB1	16	47	Rel homology region (RHR) factors	NF-kappaB-related factors	0.0315253	depleted	0.26252	-0.795597	0.576105	FALSE
TFAP2A(var.2)	34	79	Basic helix-span-helix factors (bHSH)	AP-2	0.0323311	depleted	0.264422	-0.457326	0.728335	FALSE
ZNF740	30	72	C2H2 zinc finger factors	Other factors with up to three adjacent zinc fingers	0.0348196	depleted	0.264472	-0.504043	0.705128	FALSE
FOXK2	21	56	Fork head / winged helix factors	Forkhead box (FOX) factors	0.0353632	depleted	0.264472	-0.656046	0.634615	FALSE
KLF5	43	93	C2H2 zinc finger factors	Three-zinc finger KrÃ¼ppel-related factors	0.035996	depleted	0.264472	-0.353902	0.782465	FALSE
POU3F4	20	54	Homeo domain factors	POU domain factors	0.036759	depleted	0.264472	-0.673968	0.626781	FALSE
MTF1	20	54	C2H2 zinc finger factors	More than 3 adjacent zinc finger factors	0.036759	depleted	0.264472	-0.673968	0.626781	FALSE
NRF1	29	70	Basic leucine zipper factors (bZIP)	Jun-related factors	0.0374939	depleted	0.264472	-0.51231	0.701099	FALSE
GLIS2	29	70	C2H2 zinc finger factors	More than 3 adjacent zinc finger factors	0.0374939	depleted	0.264472	-0.51231	0.701099	FALSE
IRF2	25	63	Tryptophan cluster factors	Interferon-regulatory factors	0.0375343	depleted	0.264472	-0.574432	0.671551	FALSE
RELA	25	63	Rel homology region (RHR) factors	NF-kappaB-related factors	0.0375343	depleted	0.264472	-0.574432	0.671551	FALSE
PBX1	11	36	Homeo domain factors	TALE-type homeo domain factors	0.0412289	depleted	0.283619	-0.951501	0.517094	FALSE
ZIC4	34	78	C2H2 zinc finger factors	More than 3 adjacent zinc finger factors	0.0421029	depleted	0.283619	-0.438947	0.737673	FALSE
IRF1	50	103	Tryptophan cluster factors	Interferon-regulatory factors	0.0421094	depleted	0.283619	-0.283652	0.821509	FALSE
FEV	6	25	Tryptophan cluster factors	Ets-related factors	0.0435065	depleted	0.288782	-1.2999	0.406154	FALSE
ZIC1	36	81	C2H2 zinc finger factors	More than 3 adjacent zinc finger factors	0.0454698	depleted	0.293312	-0.410933	0.752137	FALSE
RBPJ	36	81	Rel homology region (RHR) factors	CSL-related factors	0.0454698	depleted	0.293312	-0.410933	0.752137	FALSE
TEAD1	20	53	TEA domain factors	TEF-1-related factors	0.0472995	depleted	0.300878	-0.647	0.638607	FALSE
TFAP2A(var.3)	29	69	Basic helix-span-helix factors (bHSH)	AP-2	0.04824	depleted	0.302656	-0.491552	0.71126	FALSE
INSM1	32	74	C2H2 zinc finger factors	Factors with multiple dispersed zinc fingers	0.0496715	depleted	0.307426	-0.450461	0.731809	FALSE
GCM1	18	49	GCM domain factors	GCM factors	0.0503963	depleted	0.307753	-0.685793	0.621664	FALSE
CEBPE	5	22	Basic leucine zipper factors (bZIP)	C/EBP-related	0.0533368	depleted	0.311694	-1.37851	0.384615	FALSE
RARA	15	43	Nuclear receptors with C4 zinc fingers	Thyroid hormone receptor-related factors (NR1)	0.0535827	depleted	0.311694	-0.760382	0.59034	FALSE
PAX1	15	43	Paired box factors	Paired domain only	0.0535827	depleted	0.311694	-0.760382	0.59034	FALSE
Pax6	11	35	Paired box factors	Paired plus homeo domain	0.0537638	depleted	0.311694	-0.910859	0.531868	FALSE
CDX2	27	65	Homeo domain factors	HOX-related factors	0.0548147	depleted	0.313814	-0.508488	0.702959	FALSE
ZBTB7B	22	56	C2H2 zinc finger factors	More than 3 adjacent zinc finger factors	0.0557787	depleted	0.315391	-0.588931	0.664835	FALSE
CUX1	6	24	Homeo domain factors	HD-CUT factors	0.0581075	depleted	0.324552	-1.24101	0.423077	FALSE
EVX2	7	26	Homeo domain factors	HOX-related factors	0.0619298	depleted	0.341733	-1.13409	0.455621	FALSE
SP2	45	94	C2H2 zinc finger factors	Three-zinc finger KrÃ¼ppel-related factors	0.0642855	depleted	0.350509	-0.303744	0.810147	FALSE
PKNOX1	23	57	Homeo domain factors	TALE-type homeo domain factors	0.0676171	depleted	0.357892	-0.550336	0.682861	FALSE
HOXB2	10	32	Homeo domain factors	HOX-related factors	0.0686224	depleted	0.357892	-0.91908	0.528846	FALSE
ZBED1	1	11	C2H2 zinc finger factors	BED zinc finger factors	0.0688405	depleted	0.357892	-2.70044	0.153846	FALSE
NFIC::TLX1	27	64	SMAD/NF-1 DNA-binding domain factors::Homeo domain factors	Nuclear factor 1::NK-related factors	0.0694184	depleted	0.357892	-0.486121	0.713942	FALSE
NFE2	11	34	Basic leucine zipper factors (bZIP)	Jun-related factors	0.0695466	depleted	0.357892	-0.869039	0.547511	FALSE
CEBPB	5	21	Basic leucine zipper factors (bZIP)	C/EBP-related	0.0714545	depleted	0.359628	-1.3114	0.40293	FALSE
CEBPD	5	21	Basic leucine zipper factors (bZIP)	C/EBP-related	0.0714545	depleted	0.359628	-1.3114	0.40293	FALSE
ZNF384	48	98	C2H2 zinc finger factors	More than 3 adjacent zinc finger factors	0.0755096	depleted	0.375906	-0.270755	0.828885	FALSE
NR2C2	35	77	Nuclear receptors with C4 zinc fingers	RXR-related receptors (NR2)	0.0807703	depleted	0.397772	-0.378512	0.769231	FALSE
IRF5	17	45	Tryptophan cluster factors	Interferon-regulatory factors	0.0834633	depleted	0.406661	-0.645398	0.639316	FALSE
EGR2	23	56	C2H2 zinc finger factors	Three-zinc finger KrÃ¼ppel-related factors	0.0849707	depleted	0.407265	-0.524801	0.695055	FALSE
VDR	16	43	Nuclear receptors with C4 zinc fingers	Thyroid hormone receptor-related factors (NR1)	0.0853656	depleted	0.407265	-0.667273	0.629696	FALSE
GSX1	27	30	Homeo domain factors	HOX-related factors	0.0870285	enriched	0.41019	0.606989	1.52308	FALSE
ZBTB7C	22	54	C2H2 zinc finger factors	More than 3 adjacent zinc finger factors	0.0886656	depleted	0.41019	-0.536464	0.689459	FALSE
GLIS3	22	54	C2H2 zinc finger factors	More than 3 adjacent zinc finger factors	0.0886656	depleted	0.41019	-0.536464	0.689459	FALSE
KLF16	39	83	C2H2 zinc finger factors	Three-zinc finger KrÃ¼ppel-related factors	0.0923858	depleted	0.417631	-0.330645	0.795181	FALSE
ZNF263	44	91	C2H2 zinc finger factors	More than 3 adjacent zinc finger factors	0.0925912	depleted	0.417631	-0.289371	0.818259	FALSE
FOXC2	33	73	Fork head / winged helix factors	Forkhead box (FOX) factors	0.0935155	depleted	0.417631	-0.386439	0.765016	FALSE
IRF7	36	78	Tryptophan cluster factors	Interferon-regulatory factors	0.0939213	depleted	0.417631	-0.356485	0.781065	FALSE
PHOX2A	20	50	Homeo domain factors	Paired-related HD factors	0.0956604	depleted	0.421274	-0.562936	0.676923	FALSE
FIGLA	38	81	Basic helix-loop-helix factors (bHLH)	Tal-related factors	0.100432	depleted	0.437376	-0.332931	0.793922	FALSE
KLF4	35	76	C2H2 zinc finger factors	Three-zinc finger Kruppel-related factors	0.101227	depleted	0.437376	-0.359653	0.779352	FALSE
SOX13	23	55	High-mobility group (HMG) domain factors	SOX-related factors	0.105837	depleted	0.439842	-0.498806	0.707692	FALSE
PPARA::RXRA	23	55	Nuclear receptors with C4 zinc fingers::Nuclear receptors with C4 zinc fingers	Thyroid hormone receptor-related factors (NR1)::RXR-related receptors (NR2)	0.105837	depleted	0.439842	-0.498806	0.707692	FALSE
MAX	7	24	Basic helix-loop-helix factors (bHLH)	bHLH-ZIP factors	0.106051	depleted	0.439842	-1.01862	0.49359	FALSE
TFAP2B	31	69	Basic helix-span-helix factors (bHSH)	AP-2	0.106613	depleted	0.439842	-0.395336	0.760312	FALSE
FOXB1	31	69	Fork head / winged helix factors	Forkhead box (FOX) factors	0.106613	depleted	0.439842	-0.395336	0.760312	FALSE
PAX9	14	38	Paired box factors	Paired domain only	0.111176	depleted	0.439842	-0.681581	0.623482	FALSE
PPARG::RXRA	42	87	Nuclear receptors with C4 zinc fingers::Nuclear receptors with C4 zinc fingers	Thyroid hormone receptor-related factors (NR1)::RXR-related receptors (NR2)	0.112164	depleted	0.439842	-0.291634	0.816976	FALSE
NKX3-2	13	36	Homeo domain factors	NK-related factors	0.112509	depleted	0.439842	-0.710493	0.611111	FALSE
BATF3	10	30	Basic leucine zipper factors (bZIP)	B-ATF-related factors	0.113039	depleted	0.439842	-0.825971	0.564103	FALSE
FOXC1	30	67	Fork head / winged helix factors	Forkhead box (FOX) factors	0.113254	depleted	0.439842	-0.400207	0.75775	FALSE
NFYA	12	34	Other alpha	NFY	0.113322	depleted	0.439842	-0.743508	0.597285	FALSE
ELF1	12	34	Tryptophan cluster factors	Ets-related factors	0.113322	depleted	0.439842	-0.743508	0.597285	FALSE
JUNB(var.2)	2	12	Basic leucine zipper factors (bZIP)	Jun-related factors	0.122142	depleted	0.469184	-1.82597	0.282051	FALSE
NFKB2	19	47	Rel homology region (RHR) factors	NF-kappaB-related factors	0.12293	depleted	0.469184	-0.547669	0.684124	FALSE
MAFK	30	36	Basic leucine zipper factors (bZIP)	Maf-related factors	0.125079	enriched	0.473439	0.495957	1.41026	FALSE
NFIC	28	63	SMAD/NF-1 DNA-binding domain factors	Nuclear factor 1	0.126641	depleted	0.475423	-0.410933	0.752137	FALSE
TEAD2	27	61	TEA domain factors	TEF-1-related factors	0.133354	depleted	0.49328	-0.416858	0.749054	FALSE
NR1A4::RXRA	16	41	Nuclear receptors with C4 zinc fingers::Nuclear receptors with C4 zinc fingers	Thyroid hormone receptor-related factors (NR1)::RXR-related receptors (NR2)	0.133552	depleted	0.49328	-0.59856	0.660413	FALSE
ELK1	7	23	Tryptophan cluster factors	Ets-related factors	0.137079	depleted	0.494348	-0.957215	0.51505	FALSE
MNT	7	23	Basic helix-loop-helix factors (bHLH)	bHLH-ZIP factors	0.137079	depleted	0.494348	-0.957215	0.51505	FALSE
FOSB::JUN	7	23	Basic leucine zipper factors (bZIP)::Basic leucine zipper factors (bZIP)	Fos-related factors::Jun-related factors	0.137079	depleted	0.494348	-0.957215	0.51505	FALSE
EHF	14	37	Tryptophan cluster factors	Ets-related factors	0.138954	depleted	0.494569	-0.643107	0.640333	FALSE
ELK3	8	25	Tryptophan cluster factors	Ets-related factors	0.14038	depleted	0.494569	-0.884864	0.541538	FALSE
ETV3	8	25	Tryptophan cluster factors	Ets-related factors	0.14038	depleted	0.494569	-0.884864	0.541538	FALSE
ARNT::HIF1A	12	33	Basic helix-loop-helix factors (bHLH)::Basic helix-loop-helix factors (bHLH)	PAS domain factors::PAS domain factors	0.142431	depleted	0.497965	-0.70044	0.615385	FALSE
CTCF	36	76	C2H2 zinc finger factors	More than 3 adjacent zinc finger factors	0.144299	depleted	0.500675	-0.319011	0.801619	FALSE
FOXK1	20	48	Fork head / winged helix factors	Forkhead box (FOX) factors	0.146524	depleted	0.501532	-0.504043	0.705128	FALSE
IRF9	25	57	Tryptophan cluster factors	Interferon-regulatory factors	0.146736	depleted	0.501532	-0.430042	0.74224	FALSE
ELF3	19	46	Tryptophan cluster factors	Ets-related factors	0.151487	depleted	0.503239	-0.516643	0.698997	FALSE
EGR4	32	69	C2H2 zinc finger factors	Three-zinc finger KrÃ¼ppel-related factors	0.151779	depleted	0.503239	-0.349533	0.784838	FALSE
MYB	24	55	Tryptophan cluster factors	Myb/SANT domain factors	0.153369	depleted	0.503239	-0.437405	0.738462	FALSE
NKX6-1	24	55	Homeo domain factors	NK-related factors	0.153369	depleted	0.503239	-0.437405	0.738462	FALSE
TEAD4	24	55	TEA domain factors	TEF-1-related factors	0.153369	depleted	0.503239	-0.437405	0.738462	FALSE
FOSB::JUNB(var.2)	4	16	Basic leucine zipper factors (bZIP)::Basic leucine zipper factors (bZIP)	Fos-related factors::Jun-related factors	0.15421	depleted	0.503239	-1.24101	0.423077	FALSE
FOXP1	28	62	Fork head / winged helix factors	Forkhead box (FOX) factors	0.154927	depleted	0.503239	-0.387849	0.764268	FALSE
RORA	18	44	Nuclear receptors with C4 zinc fingers	Thyroid hormone receptor-related factors (NR1)	0.156236	depleted	0.503915	-0.530515	0.692308	FALSE
MSC	40	82	Basic helix-loop-helix factors (bHLH)	Tal-related factors	0.16347	depleted	0.523562	-0.276632	0.825516	FALSE
E2F7	15	38	Fork head / winged helix factors	E2F-related factors	0.168765	depleted	0.535996	-0.582045	0.668016	FALSE
SPI1	30	65	Tryptophan cluster factors	Ets-related factors	0.169693	depleted	0.535996	-0.356485	0.781065	FALSE
ISL2	14	36	Homeo domain factors	HD-LIM factors	0.17219	depleted	0.540158	-0.603578	0.65812	FALSE
SMAD2::SMAD3::SMAD4	36	75	SMAD/NF-1 DNA-binding domain factors::SMAD/NF-1 DNA-binding domain factors::SMAD/NF-1 DNA-binding domain factors	SMAD factors::SMAD factors::SMAD factors	0.176108	depleted	0.54337	-0.299902	0.812308	FALSE
NKX3-1	12	32	Homeo domain factors	NK-related factors	0.17748	depleted	0.54337	-0.656046	0.634615	FALSE
TEF	8	24	TEA domain factors	TEF-1-related factors	0.178488	depleted	0.54337	-0.825971	0.564103	FALSE
HINFP	20	47	C2H2 zinc finger factors	Factors with multiple dispersed zinc fingers	0.179018	depleted	0.54337	-0.473669	0.720131	FALSE
EMX1	11	30	Homeo domain factors	NK-related factors	0.179146	depleted	0.54337	-0.688467	0.620513	FALSE
NR4A1	19	45	Nuclear receptors with C4 zinc fingers	NGFI-B-related receptors (NR4)	0.185085	depleted	0.557689	-0.484934	0.71453	FALSE
SCRT2	28	61	C2H2 zinc finger factors	More than 3 adjacent zinc finger factors	0.187825	depleted	0.560615	-0.364391	0.776797	FALSE
BARHL2	3	13	Homeo domain factors	NK-related factors	0.188504	depleted	0.560615	-1.35649	0.390533	FALSE
POU2F2	37	76	Homeo domain factors	POU domain factors	0.200228	depleted	0.581639	-0.279482	0.823887	FALSE
SNAI2	37	76	C2H2 zinc finger factors	More than 3 adjacent zinc finger factors	0.200228	depleted	0.581639	-0.279482	0.823887	FALSE
TGIF1	22	50	Homeo domain factors	TALE-type homeo domain factors	0.201751	depleted	0.581639	-0.425433	0.744615	FALSE
ZNF24	22	50	C2H2 zinc finger factors	More than 3 adjacent zinc finger factors	0.201751	depleted	0.581639	-0.425433	0.744615	FALSE
TP73	16	39	p53 domain factors	p53-related factors	0.201923	depleted	0.581639	-0.52641	0.69428	FALSE
KLF9	42	84	C2H2 zinc finger factors	Three-zinc finger Kruppel-related factors	0.210009	depleted	0.601151	-0.241008	0.846154	FALSE
ZEB1	39	79	Homeo domain factors	HD-ZF factors	0.212779	depleted	0.601728	-0.259387	0.835443	FALSE
ATF7	5	17	Basic leucine zipper factors (bZIP)	Jun-related factors	0.212838	depleted	0.601728	-1.00654	0.497738	FALSE
POU2F1	25	55	Homeo domain factors	POU domain factors	0.215207	depleted	0.602282	-0.378512	0.769231	FALSE
MXI1	13	33	Basic helix-loop-helix factors (bHLH)	bHLH-ZIP factors	0.215664	depleted	0.602282	-0.584963	0.666667	FALSE
NFE2L2	32	67	Basic leucine zipper factors (bZIP)	Jun-related factors	0.221689	depleted	0.611614	-0.307097	0.808266	FALSE
FOS::JUN(var.2)	11	29	Basic leucine zipper factors (bZIP)::Basic leucine zipper factors (bZIP)	Fos-related factors::Jun-related factors	0.222092	depleted	0.611614	-0.639557	0.64191	FALSE
HEY1	10	27	Basic helix-loop-helix factors (bHLH)	Hairy-related factors	0.224129	depleted	0.611614	-0.673968	0.626781	FALSE
TFAP2B(var.2)	35	72	Basic helix-span-helix factors (bHSH)	AP-2	0.22547	depleted	0.611614	-0.28165	0.82265	FALSE
KLF14	28	60	C2H2 zinc finger factors	Three-zinc finger KrÃ¼ppel-related factors	0.225683	depleted	0.611614	-0.340544	0.789744	FALSE
HOXA10	27	58	Homeo domain factors	HOX-related factors	0.23617	depleted	0.633722	-0.344102	0.787798	FALSE
THAP1	43	85	C2CH THAP-type zinc finger factors	THAP-related factors	0.236608	depleted	0.633722	-0.224134	0.856109	FALSE
RARA(var.2)	22	49	Nuclear receptors with C4 zinc fingers	Thyroid hormone receptor-related factors (NR1)	0.242496	depleted	0.641445	-0.396286	0.759812	FALSE
TEAD3	22	49	TEA domain factors	TEF-1-related factors	0.242496	depleted	0.641445	-0.396286	0.759812	FALSE
CREB3L1	16	38	Basic leucine zipper factors (bZIP)	CREB-related factors	0.245093	depleted	0.641445	-0.488936	0.712551	FALSE
BARX1	16	38	Homeo domain factors	NK-related factors	0.245093	depleted	0.641445	-0.488936	0.712551	FALSE
MYBL1	3	12	Tryptophan cluster factors	Myb/SANT domain factors	0.250685	depleted	0.647188	-1.24101	0.423077	FALSE
FOXP2	33	68	Fork head / winged helix factors	Forkhead box (FOX) factors	0.251201	depleted	0.647188	-0.284077	0.821267	FALSE
VAX2	15	36	Homeo domain factors	NK-related factors	0.251527	depleted	0.647188	-0.504043	0.705128	FALSE
TFAP2A	36	73	Basic helix-span-helix factors (bHSH)	AP-2	0.25459	depleted	0.65141	-0.260908	0.834563	FALSE
HES5	14	34	Basic helix-loop-helix factors (bHLH)	Hairy-related factors	0.257604	depleted	0.655371	-0.521116	0.696833	FALSE
IRF8	20	45	Tryptophan cluster factors	Interferon-regulatory factors	0.260431	depleted	0.655371	-0.410933	0.752137	FALSE
NR2F2	20	45	Nuclear receptors with C4 zinc fingers	RXR-related receptors (NR2)	0.260431	depleted	0.655371	-0.410933	0.752137	FALSE
GBX2	22	27	Homeo domain factors	HOX-related factors	0.265155	enriched	0.656047	0.463536	1.37892	FALSE
SPDEF	12	30	Tryptophan cluster factors	Ets-related factors	0.268372	depleted	0.656047	-0.562936	0.676923	FALSE
TFEC	12	30	Basic helix-loop-helix factors (bHLH)	bHLH-ZIP factors	0.268372	depleted	0.656047	-0.562936	0.676923	FALSE
YY1	28	59	C2H2 zinc finger factors	More than 3 adjacent zinc finger factors	0.268792	depleted	0.656047	-0.316296	0.803129	FALSE
TCF3	41	81	Basic helix-loop-helix factors (bHLH)	E2A-related factors	0.269574	depleted	0.656047	-0.223306	0.8566	FALSE
ID4	41	81	Basic helix-loop-helix factors (bHLH)	HLH domain only	0.269574	depleted	0.656047	-0.223306	0.8566	FALSE
MAFF	32	43	Basic leucine zipper factors (bZIP)	Maf-related factors	0.277579	enriched	0.656047	0.332727	1.25939	FALSE
FOXF2	18	41	Fork head / winged helix factors	Forkhead box (FOX) factors	0.277977	depleted	0.656047	-0.428635	0.742964	FALSE
MEOX2	18	41	Homeo domain factors	HOX-related factors	0.277977	depleted	0.656047	-0.428635	0.742964	FALSE
FOSL1::JUND(var.2)	6	18	Basic leucine zipper factors (bZIP)::Basic leucine zipper factors (bZIP)	Fos-related factors::Jun-related factors	0.278484	depleted	0.656047	-0.825971	0.564103	FALSE
ETV5	9	24	Tryptophan cluster factors	Ets-related factors	0.279271	depleted	0.656047	-0.656046	0.634615	FALSE
TFE3	7	20	Basic helix-loop-helix factors (bHLH)	bHLH-ZIP factors	0.280653	depleted	0.656047	-0.755581	0.592308	FALSE
TFCP2	8	22	Grainyhead domain factors	CP2-related factors	0.280754	depleted	0.656047	-0.70044	0.615385	FALSE
EMX2	8	22	Homeo domain factors	NK-related factors	0.280754	depleted	0.656047	-0.70044	0.615385	FALSE
IRF3	34	69	Tryptophan cluster factors	Interferon-regulatory factors	0.283114	depleted	0.658203	-0.26207	0.833891	FALSE
NEUROD1	37	74	Basic helix-loop-helix factors (bHLH)	Tal-related factors	0.28609	depleted	0.659469	-0.241008	0.846154	FALSE
RORB	17	39	Nuclear receptors with C4 zinc fingers	Thyroid hormone receptor-related factors (NR1)	0.286538	depleted	0.659469	-0.438947	0.737673	FALSE
IRF4	22	48	Tryptophan cluster factors	Interferon-regulatory factors	0.288985	depleted	0.660559	-0.366539	0.775641	FALSE
LEF1	30	62	High-mobility group (HMG) domain factors	TCF-7-related factors	0.290601	depleted	0.660559	-0.288314	0.818859	FALSE
OLIG1	13	14	Basic helix-loop-helix factors (bHLH)	Tal-related factors	0.291667	enriched	0.660559	0.652077	1.57143	FALSE
POU3F1	26	55	Homeo domain factors	POU domain factors	0.29278	depleted	0.660559	-0.321928	0.8	FALSE
RORC	16	37	Nuclear receptors with C4 zinc fingers	Thyroid hormone receptor-related factors (NR1)	0.294914	depleted	0.66211	-0.450461	0.731809	FALSE
E2F8	21	46	Fork head / winged helix factors	E2F-related factors	0.299557	depleted	0.666751	-0.372253	0.772575	FALSE
MIXL1	19	23	Homeo domain factors	Paired-related HD factors	0.300476	enriched	0.666751	0.483357	1.39799	FALSE
LBX2	17	20	Homeo domain factors	NK-related factors	0.301348	enriched	0.666751	0.524527	1.43846	FALSE
GATA5	20	44	Other C4 zinc finger-type factors	GATA-type zinc fingers	0.310106	depleted	0.680694	-0.378512	0.769231	FALSE
TFAP2C	32	65	Basic helix-span-helix factors (bHSH)	AP-2	0.312109	depleted	0.680694	-0.263376	0.833136	FALSE
POU5F1	32	65	Homeo domain factors	POU domain factors	0.312109	depleted	0.680694	-0.263376	0.833136	FALSE
POU5F1B	24	51	Homeo domain factors	POU domain factors	0.317013	depleted	0.687992	-0.328471	0.79638	FALSE
USF2	13	31	Basic helix-loop-helix factors (bHLH)	bHLH-ZIP factors	0.318459	depleted	0.687992	-0.494765	0.709677	FALSE
TGIF2	23	49	Homeo domain factors	TALE-type homeo domain factors	0.329213	depleted	0.705276	-0.332156	0.794349	FALSE
SOX21	27	56	High-mobility group (HMG) domain factors	SOX-related factors	0.330889	depleted	0.705276	-0.293476	0.815934	FALSE
VAX1	18	40	Homeo domain factors	NK-related factors	0.331079	depleted	0.705276	-0.393011	0.761538	FALSE
MEIS2	34	68	Homeo domain factors	TALE-type homeo domain factors	0.333314	depleted	0.706749	-0.241008	0.846154	FALSE
REST	43	83	C2H2 zinc finger factors	Factors with multiple dispersed zinc fingers	0.33604	depleted	0.707852	-0.189783	0.876738	FALSE
TFEB	10	25	Basic helix-loop-helix factors (bHLH)	bHLH-ZIP factors	0.338045	depleted	0.707852	-0.562936	0.676923	FALSE
ONECUT3	22	47	Homeo domain factors	HD-CUT factors	0.341464	depleted	0.707852	-0.336165	0.792144	FALSE
NR4A2::RXRA	17	38	Nuclear receptors with C4 zinc fingers::Nuclear receptors with C4 zinc fingers	NGFI-B-related receptors (NR4)::RXR-related receptors (NR2)	0.341468	depleted	0.707852	-0.401473	0.757085	FALSE
T	9	23	T-Box factors	Brachyury-related factors	0.343107	depleted	0.707852	-0.594645	0.662207	FALSE
FOSL2::JUND(var.2)	9	23	Basic leucine zipper factors (bZIP)::Basic leucine zipper factors (bZIP)	Fos-related factors::Jun-related factors	0.343107	depleted	0.707852	-0.594645	0.662207	FALSE
MEF2C	33	66	MADS box factors	Regulators of differentiation	0.349299	depleted	0.717393	-0.241008	0.846154	FALSE
RORA(var.2)	16	36	Nuclear receptors with C4 zinc fingers	Thyroid hormone receptor-related factors (NR1)	0.351762	depleted	0.719227	-0.410933	0.752137	FALSE
STAT1	36	71	STAT domain factors	STAT factors	0.354223	depleted	0.721041	-0.22083	0.858072	FALSE
ETV6	24	50	Tryptophan cluster factors	Ets-related factors	0.372071	depleted	0.754019	-0.299902	0.812308	FALSE
TCF4	41	79	Basic helix-loop-helix factors (bHLH)	E2A-related factors	0.375409	depleted	0.757434	-0.187237	0.878286	FALSE
PAX5	19	41	Paired box factors	Paired domain only	0.3785	depleted	0.757565	-0.350633	0.78424	FALSE
VENTX	15	18	Homeo domain factors	NK-related factors	0.378782	enriched	0.757565	0.495957	1.41026	FALSE
TP53	13	30	p53 domain factors	p53-related factors	0.381747	depleted	0.760174	-0.447459	0.733333	FALSE
FOSL2::JUN(var.2)	12	28	Basic leucine zipper factors (bZIP)::Basic leucine zipper factors (bZIP)	Fos-related factors::Jun-related factors	0.391286	depleted	0.775797	-0.463401	0.725275	FALSE
TBX5	26	53	T-Box factors	TBX2-related factors	0.401969	depleted	0.788305	-0.268489	0.830189	FALSE
FOS	17	37	Basic leucine zipper factors (bZIP)	Fos-related factors	0.403389	depleted	0.788305	-0.362999	0.777547	FALSE
ATF4	17	37	Basic leucine zipper factors (bZIP)	ATF-4-related factors	0.403389	depleted	0.788305	-0.362999	0.777547	FALSE
EN1	20	26	Homeo domain factors	NK-related factors	0.40448	enriched	0.788305	0.38048	1.30178	FALSE
HOXC11	10	24	Homeo domain factors	HOX-related factors	0.409228	depleted	0.790829	-0.504043	0.705128	FALSE
EVX1	10	24	Homeo domain factors	HOX-related factors	0.409228	depleted	0.790829	-0.504043	0.705128	FALSE
GMEB2	2	8	SAND domain factors	GMEB	0.415456	depleted	0.796575	-1.24101	0.423077	FALSE
ZBTB33	16	35	C2H2 zinc finger factors	Other factors with up to three adjacent zinc fingers	0.415876	depleted	0.796575	-0.370291	0.773626	FALSE
CEBPA	25	51	Basic leucine zipper factors (bZIP)	C/EBP-related	0.417419	depleted	0.796575	-0.269577	0.829563	FALSE
SCRT1	32	63	C2H2 zinc finger factors	More than 3 adjacent zinc finger factors	0.424105	depleted	0.80383	-0.218288	0.859585	FALSE
HNF1A	23	31	Homeo domain factors	POU domain factors	0.424731	enriched	0.80383	0.328358	1.25558	FALSE
TAL1::TCF3	28	56	Basic helix-loop-helix factors (bHLH)::Basic helix-loop-helix factors (bHLH)	Tal-related factors::E2A-related factors	0.431219	depleted	0.812751	-0.241008	0.846154	FALSE
NFYB	14	31	Other alpha	NFY	0.44089	depleted	0.822757	-0.387849	0.764268	FALSE
RARA::RXRA	31	61	Nuclear receptors with C4 zinc fingers::Nuclear receptors with C4 zinc fingers	Thyroid hormone receptor-related factors (NR1)::RXR-related receptors (NR2)	0.441918	depleted	0.822757	-0.217549	0.860025	FALSE
MEIS3	31	61	Homeo domain factors	TALE-type homeo domain factors	0.441918	depleted	0.822757	-0.217549	0.860025	FALSE
FOSL2::JUNB	19	25	Basic leucine zipper factors (bZIP)::Basic leucine zipper factors (bZIP)	Fos-related factors::Jun-related factors	0.449053	enriched	0.832656	0.363063	1.28615	FALSE
MAFG	24	33	Basic leucine zipper factors (bZIP)	Maf-related factors	0.454565	enriched	0.834602	0.29956	1.23077	FALSE
SOX9	18	38	High-mobility group (HMG) domain factors	SOX-related factors	0.457607	depleted	0.834602	-0.319011	0.801619	FALSE
NOTO	17	22	Homeo domain factors	NK-related factors	0.459451	enriched	0.834602	0.387023	1.30769	FALSE
OTX2	17	22	Homeo domain factors	Paired-related HD factors	0.459451	enriched	0.834602	0.387023	1.30769	FALSE
SPIC	30	59	Tryptophan cluster factors	Ets-related factors	0.459889	depleted	0.834602	-0.216761	0.860495	FALSE
SRY	26	52	High-mobility group (HMG) domain factors	SOX-related factors	0.465097	depleted	0.834602	-0.241008	0.846154	FALSE
REL	26	52	Rel homology region (RHR) factors	NF-kappaB-related factors	0.465097	depleted	0.834602	-0.241008	0.846154	FALSE
MEF2D	26	52	MADS box factors	Regulators of differentiation	0.465097	depleted	0.834602	-0.241008	0.846154	FALSE
SIX1	27	38	Homeo domain factors	HD-SINE factors	0.466502	enriched	0.834602	0.265952	1.20243	FALSE
BHLHE22	11	13	Basic helix-loop-helix factors (bHLH)	Tal-related factors	0.476589	enriched	0.848603	0.517984	1.43195	FALSE
GRHL2	29	57	Grainyhead domain factors	Grainyhead-related factors	0.478034	depleted	0.848603	-0.215917	0.860999	FALSE
NR2F1	25	50	Nuclear receptors with C4 zinc fingers	RXR-related receptors (NR2)	0.48233	depleted	0.852924	-0.241008	0.846154	FALSE
RFX3	10	23	Fork head / winged helix factors	RFX-related factors	0.490485	depleted	0.860698	-0.442642	0.735786	FALSE
HIF1A	10	23	Basic helix-loop-helix factors (bHLH)	PAS domain factors	0.490485	depleted	0.860698	-0.442642	0.735786	FALSE
SREBF2	28	40	Basic helix-loop-helix factors (bHLH)	bHLH-ZIP factors	0.493635	enriched	0.862896	0.244419	1.18462	FALSE
POU1F1	28	55	Homeo domain factors	POU domain factors	0.496371	depleted	0.862896	-0.215013	0.861538	FALSE
NR1H4	20	41	Nuclear receptors with C4 zinc fingers	Thyroid hormone receptor-related factors (NR1)	0.49739	depleted	0.862896	-0.276632	0.825516	FALSE
FOSL2	24	48	Basic leucine zipper factors (bZIP)	Fos-related factors	0.499788	depleted	0.863784	-0.241008	0.846154	FALSE
BHLHE40	8	19	Basic helix-loop-helix factors (bHLH)	Hairy-related factors	0.51428	depleted	0.885489	-0.488936	0.712551	FALSE
E2F2	7	17	Fork head / winged helix factors	E2F-related factors	0.525528	depleted	0.901467	-0.521116	0.696833	FALSE
MEIS1	18	37	Homeo domain factors	TALE-type homeo domain factors	0.531023	depleted	0.907494	-0.280536	0.823285	FALSE
HEY2	13	28	Basic helix-loop-helix factors (bHLH)	Hairy-related factors	0.533418	depleted	0.908198	-0.347923	0.785714	FALSE
SREBF2(var.2)	6	15	Basic helix-loop-helix factors (bHLH)	bHLH-ZIP factors	0.536004	depleted	0.909221	-0.562936	0.676923	FALSE
FOSL1::JUN(var.2)	5	13	Basic leucine zipper factors (bZIP)::Basic leucine zipper factors (bZIP)	Fos-related factors::Jun-related factors	0.545241	depleted	0.912347	-0.61952	0.650888	FALSE
MAF::NFE2	29	56	Basic leucine zipper factors (bZIP)::Basic leucine zipper factors (bZIP)	Maf-related factors::Jun-related factors	0.546709	depleted	0.912347	-0.190382	0.876374	FALSE
AR	17	35	Nuclear receptors with C4 zinc fingers	Steroid hormone receptors (NR3)	0.548305	depleted	0.912347	-0.282828	0.821978	FALSE
BATF::JUN	17	35	Basic leucine zipper factors (bZIP)::Basic leucine zipper factors (bZIP)	B-ATF-related factors::Jun-related factors	0.548305	depleted	0.912347	-0.282828	0.821978	FALSE
NKX6-2	25	49	Homeo domain factors	NK-related factors	0.55275	depleted	0.912347	-0.211862	0.863422	FALSE
SOX8	25	49	High-mobility group (HMG) domain factors	SOX-related factors	0.55275	depleted	0.912347	-0.211862	0.863422	FALSE
E2F3	3	9	Fork head / winged helix factors	E2F-related factors	0.555922	depleted	0.912347	-0.825971	0.564103	FALSE
POU4F1	32	61	Homeo domain factors	POU domain factors	0.556967	depleted	0.912347	-0.171745	0.887768	FALSE
POU4F3	32	61	Homeo domain factors	POU domain factors	0.556967	depleted	0.912347	-0.171745	0.887768	FALSE
CREB3	11	24	Basic leucine zipper factors (bZIP)	CREB-related factors	0.565412	depleted	0.912347	-0.366539	0.775641	FALSE
SHOX	20	28	Homeo domain factors	Paired-related HD factors	0.569719	enriched	0.912347	0.273565	1.20879	FALSE
ISX	20	28	Homeo domain factors	Paired-related HD factors	0.569719	enriched	0.912347	0.273565	1.20879	FALSE
LHX9	20	28	Homeo domain factors	HD-LIM factors	0.569719	enriched	0.912347	0.273565	1.20879	FALSE
PRRX1	20	28	Homeo domain factors	Paired-related HD factors	0.569719	enriched	0.912347	0.273565	1.20879	FALSE
RAX2	20	28	Homeo domain factors	Paired-related HD factors	0.569719	enriched	0.912347	0.273565	1.20879	FALSE
UNCX	20	28	Homeo domain factors	Paired-related HD factors	0.569719	enriched	0.912347	0.273565	1.20879	FALSE
SPIB	34	64	Tryptophan cluster factors	Ets-related factors	0.586504	depleted	0.932704	-0.153545	0.899038	FALSE
HIC2	34	64	C2H2 zinc finger factors	Factors with multiple dispersed zinc fingers	0.586504	depleted	0.932704	-0.153545	0.899038	FALSE
PBX3	37	69	Homeo domain factors	TALE-type homeo domain factors	0.592953	depleted	0.939696	-0.140079	0.907469	FALSE
RFX2	9	20	Fork head / winged helix factors	RFX-related factors	0.598667	depleted	0.945481	-0.393011	0.761538	FALSE
HSF1	18	36	Heat shock factors	HSF factors	0.610879	depleted	0.958159	-0.241008	0.846154	FALSE
MSX2	18	36	Homeo domain factors	NK-related factors	0.610879	depleted	0.958159	-0.241008	0.846154	FALSE
RUNX3	24	35	Runt domain factors	Runt-related factors	0.614364	enriched	0.960336	0.214671	1.16044	FALSE
HNF4A	27	40	Nuclear receptors with C4 zinc fingers	RXR-related receptors (NR2)	0.62087	enriched	0.965217	0.191951	1.14231	FALSE
STAT3	42	77	STAT domain factors	STAT factors	0.624171	depleted	0.965217	-0.115477	0.923077	FALSE
NFIL3	19	27	Basic leucine zipper factors (bZIP)	C/EBP-related	0.625302	enriched	0.965217	0.252032	1.19088	FALSE
NR4A2	25	48	Nuclear receptors with C4 zinc fingers	NGFI-B-related receptors (NR4)	0.6283	depleted	0.965217	-0.182114	0.88141	FALSE
POU4F2	32	60	Homeo domain factors	POU domain factors	0.630436	depleted	0.965217	-0.147899	0.902564	FALSE
NEUROG2	17	34	Basic helix-loop-helix factors (bHLH)	Tal-related factors	0.63084	depleted	0.965217	-0.241008	0.846154	FALSE
TBX15	21	41	T-Box factors	TBX1-related factors	0.632238	depleted	0.965217	-0.206243	0.866792	FALSE
RFX4	12	25	Fork head / winged helix factors	RFX-related factors	0.641288	depleted	0.965556	-0.299902	0.812308	FALSE
CLOCK	12	25	Basic helix-loop-helix factors (bHLH)	PAS domain factors	0.641288	depleted	0.965556	-0.299902	0.812308	FALSE
BHLHE23	12	16	Basic helix-loop-helix factors (bHLH)	Tal-related factors	0.643982	enriched	0.965556	0.343954	1.26923	FALSE
ESRRB	25	37	Nuclear receptors with C4 zinc fingers	Steroid hormone receptors (NR3)	0.645022	enriched	0.965556	0.193395	1.14345	FALSE
DMRT3	25	37	DM-type intertwined zinc finger factors	DMRT	0.645022	enriched	0.965556	0.193395	1.14345	FALSE
GSC2	17	24	Homeo domain factors	Paired-related HD factors	0.646887	enriched	0.965556	0.261492	1.19872	FALSE
NKX2-3	24	46	Homeo domain factors	NK-related factors	0.649515	depleted	0.965556	-0.179608	0.882943	FALSE
NR3C2	16	32	Nuclear receptors with C4 zinc fingers	Steroid hormone receptors (NR3)	0.651372	depleted	0.965556	-0.241008	0.846154	FALSE
FOSL2::JUNB(var.2)	6	14	Basic leucine zipper factors (bZIP)::Basic leucine zipper factors (bZIP)	Fos-related factors::Jun-related factors	0.651434	depleted	0.965556	-0.463401	0.725275	FALSE
FOS::JUND	20	29	Basic leucine zipper factors (bZIP)::Basic leucine zipper factors (bZIP)	Fos-related factors::Jun-related factors	0.660689	enriched	0.968256	0.222939	1.16711	FALSE
ETV1	11	23	Tryptophan cluster factors	Ets-related factors	0.661712	depleted	0.968256	-0.305138	0.809365	FALSE
ETV4	11	23	Tryptophan cluster factors	Ets-related factors	0.661712	depleted	0.968256	-0.305138	0.809365	FALSE
PROX1	11	23	Homeo domain factors	HD-PROS factors	0.661712	depleted	0.968256	-0.305138	0.809365	FALSE
BSX	15	21	Homeo domain factors	NK-related factors	0.668899	enriched	0.975656	0.273565	1.20879	FALSE
ESRRA	23	44	Nuclear receptors with C4 zinc fingers	Steroid hormone receptors (NR3)	0.67114	depleted	0.975817	-0.176878	0.884615	FALSE
JDP2	18	26	Basic leucine zipper factors (bZIP)	Fos-related factors	0.684691	enriched	0.981612	0.228477	1.1716	FALSE
FOSL2::JUN	18	26	Basic leucine zipper factors (bZIP)::Basic leucine zipper factors (bZIP)	Fos-related factors::Jun-related factors	0.684691	enriched	0.981612	0.228477	1.1716	FALSE
MEF2B	26	49	MADS box factors	Regulators of differentiation	0.685842	depleted	0.981612	-0.155278	0.897959	FALSE
TBX1	26	49	T-Box factors	TBX1-related factors	0.685842	depleted	0.981612	-0.155278	0.897959	FALSE
TBX4	26	49	T-Box factors	TBX2-related factors	0.685842	depleted	0.981612	-0.155278	0.897959	FALSE
PAX7	14	28	Paired box factors	Paired plus homeo domain	0.69451	depleted	0.986602	-0.241008	0.846154	FALSE
RXRA::VDR	18	35	Nuclear receptors with C4 zinc fingers::Nuclear receptors with C4 zinc fingers	RXR-related receptors (NR2)::Thyroid hormone receptor-related factors (NR1)	0.696654	depleted	0.986602	-0.200366	0.87033	FALSE
PDX1	18	35	Homeo domain factors	HOX-related factors	0.696654	depleted	0.986602	-0.200366	0.87033	FALSE
MNX1	29	54	Homeo domain factors	HOX-related factors	0.697945	depleted	0.986602	-0.137915	0.908832	FALSE
GATA1::TAL1	24	36	Other C4 zinc finger-type factors::Basic helix-loop-helix factors (bHLH)	GATA-type zinc fingers::Tal-related factors	0.701068	enriched	0.987967	0.174029	1.12821	FALSE
ZNF143	30	46	C2H2 zinc finger factors	More than 3 adjacent zinc finger factors	0.705537	enriched	0.988458	0.142321	1.10368	FALSE
OLIG3	16	23	Basic helix-loop-helix factors (bHLH)	Tal-related factors	0.709522	enriched	0.988458	0.23543	1.17726	FALSE
GBX1	16	23	Homeo domain factors	HOX-related factors	0.709522	enriched	0.988458	0.23543	1.17726	FALSE
HSF4	21	40	Heat shock factors	HSF factors	0.715844	depleted	0.988458	-0.170619	0.888462	FALSE
POU6F1	13	26	Homeo domain factors	POU domain factors	0.717348	depleted	0.988458	-0.241008	0.846154	FALSE
PAX3	13	26	Paired box factors	Paired plus homeo domain	0.717348	depleted	0.988458	-0.241008	0.846154	FALSE
RAX	19	28	Homeo domain factors	Paired-related HD factors	0.72084	enriched	0.988458	0.199564	1.14835	FALSE
FOSL1::JUND	19	28	Basic leucine zipper factors (bZIP)::Basic leucine zipper factors (bZIP)	Fos-related factors::Jun-related factors	0.72084	enriched	0.988458	0.199564	1.14835	FALSE
FOSL2::JUND	19	28	Basic leucine zipper factors (bZIP)::Basic leucine zipper factors (bZIP)	Fos-related factors::Jun-related factors	0.72084	enriched	0.988458	0.199564	1.14835	FALSE
POU3F3	31	57	Homeo domain factors	POU domain factors	0.731444	depleted	0.997429	-0.119702	0.920378	FALSE
GATA2	25	38	Other C4 zinc finger-type factors	GATA-type zinc fingers	0.731738	enriched	0.997429	0.154921	1.11336	FALSE
JUNB	20	38	Basic leucine zipper factors (bZIP)	Jun-related factors	0.739054	depleted	0.998485	-0.167008	0.890688	FALSE
FOXG1	20	38	Fork head / winged helix factors	Forkhead box (FOX) factors	0.739054	depleted	0.998485	-0.167008	0.890688	FALSE
GLIS1	20	38	C2H2 zinc finger factors	More than 3 adjacent zinc finger factors	0.739054	depleted	0.998485	-0.167008	0.890688	FALSE
ESX1	17	25	Homeo domain factors	Paired-related HD factors	0.747957	enriched	1	0.202599	1.15077	FALSE
MYC	23	43	Basic helix-loop-helix factors (bHLH)	bHLH-ZIP factors	0.755015	depleted	1	-0.143711	0.905188	FALSE
POU6F2	19	36	Homeo domain factors	POU domain factors	0.76294	depleted	1	-0.163006	0.893162	FALSE
TCF7L1	33	60	High-mobility group (HMG) domain factors	TCF-7-related factors	0.764302	depleted	1	-0.103505	0.930769	FALSE
HLF	11	22	Basic leucine zipper factors (bZIP)	C/EBP-related	0.766376	depleted	1	-0.241008	0.846154	FALSE
MYCN	11	22	Basic helix-loop-helix factors (bHLH)	bHLH-ZIP factors	0.766376	depleted	1	-0.241008	0.846154	FALSE
PITX3	15	29	Homeo domain factors	Paired-related HD factors	0.767398	depleted	1	-0.192098	0.875332	FALSE
JUND(var.2)	22	41	Basic leucine zipper factors (bZIP)	Jun-related factors	0.779106	depleted	1	-0.139128	0.908068	FALSE
JUND	18	27	Basic leucine zipper factors (bZIP)	Jun-related factors	0.784491	enriched	1	0.174029	1.12821	FALSE
ZSCAN4	32	58	C2H2 zinc finger factors	More than 3 adjacent zinc finger factors	0.788717	depleted	1	-0.0989891	0.933687	FALSE
LMX1A	25	46	Homeo domain factors	HD-LIM factors	0.792488	depleted	1	-0.120714	0.919732	FALSE
LMX1B	25	46	Homeo domain factors	HD-LIM factors	0.792488	depleted	1	-0.120714	0.919732	FALSE
EN2	14	27	Homeo domain factors	NK-related factors	0.792935	depleted	1	-0.188541	0.877493	FALSE
HOXC12	14	27	Homeo domain factors	HOX-related factors	0.792935	depleted	1	-0.188541	0.877493	FALSE
JUN::JUNB	14	27	Basic leucine zipper factors (bZIP)::Basic leucine zipper factors (bZIP)	Jun-related factors::Jun-related factors	0.792935	depleted	1	-0.188541	0.877493	FALSE
JDP2(var.2)	10	20	Basic leucine zipper factors (bZIP)	Fos-related factors	0.793037	depleted	1	-0.241008	0.846154	FALSE
RELB	28	51	Rel homology region (RHR) factors	NF-kappaB-related factors	0.803759	depleted	1	-0.106079	0.92911	FALSE
PAX4	13	19	Paired box factors	Paired plus homeo domain	0.807148	enriched	1	0.211504	1.15789	FALSE
NFATC2	41	73	Rel homology region (RHR) factors	NFAT-related factors	0.809063	depleted	1	-0.0732807	0.950474	FALSE
MEF2A	31	56	MADS box factors	Regulators of differentiation	0.813371	depleted	1	-0.0941667	0.936813	FALSE
LHX2	19	29	Homeo domain factors	HD-LIM factors	0.819368	enriched	1	0.148938	1.10875	FALSE
RFX5	13	25	Fork head / winged helix factors	RFX-related factors	0.819738	depleted	1	-0.184425	0.88	FALSE
DBP	9	18	Basic leucine zipper factors (bZIP)	C/EBP-related	0.821572	depleted	1	-0.241008	0.846154	FALSE
TBX2	27	49	T-Box factors	TBX2-related factors	0.828579	depleted	1	-0.10083	0.932496	FALSE
POU3F2	27	49	Homeo domain factors	POU domain factors	0.828579	depleted	1	-0.10083	0.932496	FALSE
EOMES	27	49	T-Box factors	TBrain-related factors	0.828579	depleted	1	-0.10083	0.932496	FALSE
NFATC3	30	54	Rel homology region (RHR) factors	NFAT-related factors	0.838303	depleted	1	-0.089005	0.940171	FALSE
GRHL1	16	30	Grainyhead domain factors	Grainyhead-related factors	0.839725	depleted	1	-0.147899	0.902564	FALSE
TBX20	35	56	T-Box factors	TBX1-related factors	0.840118	enriched	1	0.08092	1.05769	FALSE
HNF4G	33	59	Nuclear receptors with C4 zinc fingers	RXR-related receptors (NR2)	0.846749	depleted	1	-0.079257	0.946545	FALSE
NFIX	33	59	SMAD/NF-1 DNA-binding domain factors	Nuclear factor 1	0.846749	depleted	1	-0.079257	0.946545	FALSE
NKX2-8	29	46	Homeo domain factors	NK-related factors	0.84805	enriched	1	0.0934109	1.06689	FALSE
FOXO3	23	36	Fork head / winged helix factors	Forkhead box (FOX) factors	0.85236	enriched	1	0.112629	1.0812	FALSE
FOXA1	35	62	Fork head / winged helix factors	Forkhead box (FOX) factors	0.879647	depleted	1	-0.0659214	0.955335	FALSE
GSX2	24	38	Homeo domain factors	HOX-related factors	0.882659	enriched	1	0.0960269	1.06883	FALSE
MEOX1	18	33	Homeo domain factors	HOX-related factors	0.882742	depleted	1	-0.115477	0.923077	FALSE
RHOXF1	18	33	Homeo domain factors	Paired-related HD factors	0.882742	depleted	1	-0.115477	0.923077	FALSE
MSX1	21	33	Homeo domain factors	NK-related factors	0.88494	enriched	1	0.106915	1.07692	FALSE
GSC	15	23	Homeo domain factors	Paired-related HD factors	0.88622	enriched	1	0.142321	1.10368	FALSE
FOSL1	18	28	Basic leucine zipper factors (bZIP)	Fos-related factors	0.886249	enriched	1	0.121562	1.08791	FALSE
EBF1	28	50	Rel homology region (RHR) factors	Early B-Cell Factor-related factors	0.889181	depleted	1	-0.0775094	0.947692	FALSE
MYF6	28	50	Basic helix-loop-helix factors (bHLH)	MyoD / ASC-related factors	0.889181	depleted	1	-0.0775094	0.947692	FALSE
ESR2	37	60	Nuclear receptors with C4 zinc fingers	Steroid hormone receptors (NR3)	0.892575	enriched	1	0.0615547	1.04359	FALSE
DUXA	21	38	Homeo domain factors	Paired-related HD factors	0.895271	depleted	1	-0.0966182	0.935223	FALSE
TP63	14	26	p53 domain factors	p53-related factors	0.896652	depleted	1	-0.134093	0.911243	FALSE
NR3C1	17	31	Nuclear receptors with C4 zinc fingers	Steroid hormone receptors (NR3)	0.911022	depleted	1	-0.107742	0.92804	FALSE
HNF1B	17	31	Homeo domain factors	POU domain factors	0.911022	depleted	1	-0.107742	0.92804	FALSE
FOSL1::JUN	19	30	Basic leucine zipper factors (bZIP)::Basic leucine zipper factors (bZIP)	Fos-related factors::Jun-related factors	0.919313	enriched	1	0.100029	1.07179	FALSE
FOSB::JUNB	19	30	Basic leucine zipper factors (bZIP)::Basic leucine zipper factors (bZIP)	Fos-related factors::Jun-related factors	0.919313	enriched	1	0.100029	1.07179	FALSE
MYBL2	7	10	Tryptophan cluster factors	Myb/SANT domain factors	0.922537	enriched	1	0.244419	1.18462	FALSE
OLIG2	13	20	Basic helix-loop-helix factors (bHLH)	Tal-related factors	0.924075	enriched	1	0.137504	1.1	FALSE
HOXD12	13	20	Homeo domain factors	HOX-related factors	0.924075	enriched	1	0.137504	1.1	FALSE
BHLHE41	6	12	Basic helix-loop-helix factors (bHLH)	Hairy-related factors	0.924518	depleted	1	-0.241008	0.846154	FALSE
MGA	23	41	T-Box factors	TBX6-related factors	0.932886	depleted	1	-0.0749981	0.949343	FALSE
TBR1	29	47	T-Box factors	TBrain-related factors	0.935708	enriched	1	0.062384	1.04419	FALSE
DUX4	26	46	Homeo domain factors	Paired-related HD factors	0.94175	depleted	1	-0.0641303	0.956522	FALSE
JUN	26	46	Basic leucine zipper factors (bZIP)	Jun-related factors	0.94175	depleted	1	-0.0641303	0.956522	FALSE
SMAD3	9	17	SMAD/NF-1 DNA-binding domain factors	SMAD factors	0.945675	depleted	1	-0.158546	0.895928	FALSE
FOXH1	29	51	Fork head / winged helix factors	Forkhead box (FOX) factors	0.949751	depleted	1	-0.0554524	0.962293	FALSE
NFIA	33	54	SMAD/NF-1 DNA-binding domain factors	Nuclear factor 1	0.95706	enriched	1	0.0484985	1.03419	FALSE
SIX2	33	54	Homeo domain factors	HD-SINE factors	0.95706	enriched	1	0.0484985	1.03419	FALSE
PKNOX2	32	56	Homeo domain factors	TALE-type homeo domain factors	0.95713	depleted	1	-0.048363	0.967033	FALSE
HOXD11	12	22	Homeo domain factors	HOX-related factors	0.960244	depleted	1	-0.115477	0.923077	FALSE
TFAP2C(var.2)	40	66	Basic helix-span-helix factors (bHSH)	AP-2	0.970704	enriched	1	0.0365259	1.02564	FALSE
FOS::JUNB	15	27	Basic leucine zipper factors (bZIP)::Basic leucine zipper factors (bZIP)	Fos-related factors::Jun-related factors	0.971518	depleted	1	-0.089005	0.940171	FALSE
PPARG	24	39	Nuclear receptors with C4 zinc fingers	Thyroid hormone receptor-related factors (NR1)	0.975138	enriched	1	0.0585522	1.04142	FALSE
TCF7L2	37	61	High-mobility group (HMG) domain factors	TCF-7-related factors	0.977162	enriched	1	0.0377079	1.02648	FALSE
ESR1	21	34	Nuclear receptors with C4 zinc fingers	Steroid hormone receptors (NR3)	0.981489	enriched	1	0.0638465	1.04525	FALSE
JUN(var.2)	21	34	Basic leucine zipper factors (bZIP)	Jun-related factors	0.981489	enriched	1	0.0638465	1.04525	FALSE
MLX	8	15	Basic helix-loop-helix factors (bHLH)	bHLH-ZIP factors	0.984363	depleted	1	-0.147899	0.902564	FALSE
OTX1	8	15	Homeo domain factors	Paired-related HD factors	0.984363	depleted	1	-0.147899	0.902564	FALSE
BACH2	31	51	Basic leucine zipper factors (bZIP)	Jun-related factors	0.98999	enriched	1	0.0407629	1.02866	FALSE
HMBOX1	11	20	Homeo domain factors	POU domain factors	0.995411	depleted	1	-0.103505	0.930769	FALSE
HOXA2	11	20	Homeo domain factors	HOX-related factors	0.995411	depleted	1	-0.103505	0.930769	FALSE
JUN::JUNB(var.2)	11	20	Basic leucine zipper factors (bZIP)::Basic leucine zipper factors (bZIP)	Jun-related factors::Jun-related factors	0.995411	depleted	1	-0.103505	0.930769	FALSE
HESX1	15	24	Homeo domain factors	Paired-related HD factors	0.995814	enriched	1	0.08092	1.05769	FALSE
CREB1	14	25	Basic leucine zipper factors (bZIP)	CREB-related factors	1	depleted	1	-0.0775094	0.947692	FALSE
PRDM1	38	63	C2H2 zinc finger factors	More than 3 adjacent zinc finger factors	1	enriched	1	0.0296395	1.02076	FALSE
TBX19	12	19	T-Box factors	Brachyury-related factors	1	enriched	1	0.0960269	1.06883	FALSE
NRL	37	63	Basic leucine zipper factors (bZIP)	Maf-related factors	1	depleted	1	-0.00883466	0.993895	FALSE
SREBF1	26	43	Basic helix-loop-helix factors (bHLH)	bHLH-ZIP factors	1	enriched	1	0.0331669	1.02326	FALSE
BCL6B	29	49	C2H2 zinc finger factors	More than 3 adjacent zinc finger factors	1	enriched	1	0.00226305	1.00157	FALSE
NEUROD2	11	19	Basic helix-loop-helix factors (bHLH)	Tal-related factors	1	depleted	1	-0.029504	0.979757	FALSE
XBP1	11	19	Basic leucine zipper factors (bZIP)	XBP-1-related factors	1	depleted	1	-0.029504	0.979757	FALSE
E2F1	6	10	Fork head / winged helix factors	E2F-related factors	1	enriched	1	0.0220263	1.01538	FALSE
RUNX1	47	79	Runt domain factors	Runt-related factors	1	enriched	1	0.0098	1.00682	FALSE
FOXD1	19	33	Fork head / winged helix factors	Forkhead box (FOX) factors	1	depleted	1	-0.0374747	0.974359	FALSE
FOXL1	19	33	Fork head / winged helix factors	Forkhead box (FOX) factors	1	depleted	1	-0.0374747	0.974359	FALSE
FOXI1	19	33	Fork head / winged helix factors	Forkhead box (FOX) factors	1	depleted	1	-0.0374747	0.974359	FALSE
SOX10	42	70	High-mobility group (HMG) domain factors	SOX-related factors	1	enriched	1	0.0220263	1.01538	FALSE
VSX1	21	35	Homeo domain factors	Paired-related HD factors	1	enriched	1	0.0220263	1.01538	FALSE
VSX2	21	35	Homeo domain factors	Paired-related HD factors	1	enriched	1	0.0220263	1.01538	FALSE
FOXD2	19	33	Fork head / winged helix factors	Forkhead box (FOX) factors	1	depleted	1	-0.0374747	0.974359	FALSE
FOXO4	19	33	Fork head / winged helix factors	Forkhead box (FOX) factors	1	depleted	1	-0.0374747	0.974359	FALSE
FOXO6	19	33	Fork head / winged helix factors	Forkhead box (FOX) factors	1	depleted	1	-0.0374747	0.974359	FALSE
FOXP3	19	33	Fork head / winged helix factors	Forkhead box (FOX) factors	1	depleted	1	-0.0374747	0.974359	FALSE
HOXC10	16	26	Homeo domain factors	HOX-related factors	1	enriched	1	0.0585522	1.04142	FALSE
HOXC13	16	26	Homeo domain factors	HOX-related factors	1	enriched	1	0.0585522	1.04142	FALSE
NR1H2::RXRA	23	40	Nuclear receptors with C4 zinc fingers::Nuclear receptors with C4 zinc fingers	Thyroid hormone receptor-related factors (NR1)::RXR-related receptors (NR2)	1	depleted	1	-0.0393742	0.973077	FALSE
HOXA5	19	32	Homeo domain factors	HOX-related factors	1	enriched	1	0.00691941	1.00481	FALSE
LBX1	22	38	Homeo domain factors	NK-related factors	1	depleted	1	-0.029504	0.979757	FALSE
KLF13	23	40	C2H2 zinc finger factors	Three-zinc finger KrÃ¼ppel-related factors	1	depleted	1	-0.0393742	0.973077	FALSE
LHX6	17	28	Homeo domain factors	HD-LIM factors	1	enriched	1	0.0390998	1.02747	FALSE
ZNF410	20	34	C2H2 zinc finger factors	More than 3 adjacent zinc finger factors	1	depleted	1	-0.00654285	0.995475	FALSE
HSF2	23	40	Heat shock factors	HSF factors	1	depleted	1	-0.0393742	0.973077	FALSE
HES7	20	34	Basic helix-loop-helix factors (bHLH)	Hairy-related factors	1	depleted	1	-0.00654285	0.995475	FALSE
HOXB3	18	30	Homeo domain factors	HOX-related factors	1	enriched	1	0.0220263	1.01538	FALSE
FOS::JUN	18	31	Basic leucine zipper factors (bZIP)::Basic leucine zipper factors (bZIP)	Fos-related factors::Jun-related factors	1	depleted	1	-0.0252794	0.98263	FALSE
MITF	9	15	Basic helix-loop-helix factors (bHLH)	bHLH-ZIP factors	1	enriched	1	0.0220263	1.01538	FALSE
FOSL1::JUNB	17	29	Basic leucine zipper factors (bZIP)::Basic leucine zipper factors (bZIP)	Fos-related factors::Jun-related factors	1	depleted	1	-0.0115263	0.992042	FALSE
MLXIPL	7	11	Basic helix-loop-helix factors (bHLH)	bHLH-ZIP factors	1	enriched	1	0.106915	1.07692	FALSE
NHLH1	42	72	Basic helix-loop-helix factors (bHLH)	Tal-related factors	1	depleted	1	-0.0186157	0.987179	FALSE
SRF	14	24	MADS box factors	Responders to external signals (SRF/RLM1)	1	depleted	1	-0.0186157	0.987179	FALSE
RUNX2	17	30	Runt domain factors	Runt-related factors	1	depleted	1	-0.0604359	0.958974	FALSE
ALX3	22	36	Homeo domain factors	Paired-related HD factors	1	enriched	1	0.0484985	1.03419	FALSE
TBX21	30	52	T-Box factors	TBrain-related factors	1	depleted	1	-0.0345572	0.976331	FALSE
DLX6	17	30	Homeo domain factors	NK-related factors	1	depleted	1	-0.0604359	0.958974	FALSE
GATA6	27	46	Other C4 zinc finger-type factors	GATA-type zinc fingers	1	depleted	1	-0.00968255	0.993311	FALSE
PBX2	29	50	Homeo domain factors	TALE-type homeo domain factors	1	depleted	1	-0.0268833	0.981538	FALSE

## Sheet: JASPAR_TF_dosage_acquired
TF	Counts (n=428)	Counts_ns (n=132)	class	family	p_value	direction	FDR	logFC	FC	filter
TBX19	114	19	T-Box factors	Brachyury-related factors	0.00556491	enriched	1	0.88789	1.85047	FALSE
CENPB	60	32	Psq-type HTH domain		0.00836355	depleted	1	-0.790182	0.578271	FALSE
ZSCAN4	244	58	C2H2 zinc finger factors	More than 3 adjacent zinc finger factors	0.0112828	enriched	1	0.375683	1.29745	FALSE
RARA::RXRG	168	68	Nuclear receptors with C4 zinc fingers::Nuclear receptors with C4 zinc fingers	Thyroid hormone receptor-related factors (NR1)::RXR-related receptors (NR2)	0.0166849	depleted	1	-0.392218	0.761957	FALSE
ZNF282	157	64	C2H2 zinc finger factors	More than 3 adjacent zinc finger factors	0.020149	depleted	1	-0.402452	0.756571	FALSE
GLI2	112	49	C2H2 zinc finger factors	More than 3 adjacent zinc finger factors	0.0203009	depleted	1	-0.504428	0.70494	FALSE
FOXF2	182	41	Fork head / winged helix factors	Forkhead box (FOX) factors	0.0244336	enriched	1	0.45317	1.36904	FALSE
POU3F2	207	49	Homeo domain factors	POU domain factors	0.0302344	enriched	1	0.381704	1.30288	FALSE
NFATC3	223	54	Rel homology region (RHR) factors	NFAT-related factors	0.0316187	enriched	1	0.34894	1.27362	FALSE
KLF4	199	76	C2H2 zinc finger factors	Three-zinc finger Kruppel-related factors	0.0334485	depleted	1	-0.308376	0.80755	FALSE
GABPA	128	53	Tryptophan cluster factors	Ets-related factors	0.0362842	depleted	1	-0.424993	0.744842	FALSE
HOXC13	125	26	Homeo domain factors	HOX-related factors	0.0413535	enriched	1	0.568272	1.48275	FALSE
OLIG1	80	14	Basic helix-loop-helix factors (bHLH)	Tal-related factors	0.0413724	enriched	1	0.8175	1.76235	FALSE
CUX1	47	24	Homeo domain factors	HD-CUT factors	0.0429697	depleted	1	-0.727447	0.603972	FALSE
BHLHE22	75	13	Basic helix-loop-helix factors (bHLH)	Tal-related factors	0.0475471	enriched	1	0.831306	1.7793	FALSE
SOX8	203	49	High-mobility group (HMG) domain factors	SOX-related factors	0.0475666	enriched	1	0.353553	1.2777	FALSE
ERF	95	41	Tryptophan cluster factors	Ets-related factors	0.0499672	depleted	1	-0.484769	0.714611	FALSE
EGR3	213	79	C2H2 zinc finger factors	Three-zinc finger KrÃ¼ppel-related factors	0.0539115	depleted	1	-0.266144	0.831539	FALSE
IRF5	108	45	Tryptophan cluster factors	Interferon-regulatory factors	0.0594645	depleted	1	-0.434038	0.740187	FALSE
POU3F3	227	57	Homeo domain factors	POU domain factors	0.0600461	enriched	1	0.296586	1.22823	FALSE
PAX1	103	43	Paired box factors	Paired domain only	0.0667069	depleted	1	-0.436837	0.738752	FALSE
ASCL1	322	110	Basic helix-loop-helix factors (bHLH)	MyoD / ASC-related factors	0.0689307	depleted	1	-0.147516	0.902804	FALSE
TFAP2B(var.3)	196	73	Basic helix-span-helix factors (bHSH)	AP-2	0.0699909	depleted	1	-0.272188	0.828063	FALSE
CTCFL	259	92	C2H2 zinc finger factors	More than 3 adjacent zinc finger factors	0.0712141	depleted	1	-0.203827	0.868245	FALSE
FOXG1	162	38	Fork head / winged helix factors	Forkhead box (FOX) factors	0.0725222	enriched	1	0.39485	1.31481	FALSE
EGR1	168	64	C2H2 zinc finger factors	Three-zinc finger Kruppel-related factors	0.0748351	depleted	1	-0.304755	0.809579	FALSE
CUX2	42	21	Homeo domain factors	HD-CUT factors	0.0750403	depleted	1	-0.697073	0.616822	FALSE
SOX10	266	70	High-mobility group (HMG) domain factors	SOX-related factors	0.0770497	enriched	1	0.228927	1.17196	FALSE
NFE2	78	34	Basic leucine zipper factors (bZIP)	Jun-related factors	0.0771962	depleted	1	-0.499133	0.707532	FALSE
RORC	87	37	Nuclear receptors with C4 zinc fingers	Thyroid hormone receptor-related factors (NR1)	0.0812345	depleted	1	-0.463583	0.725183	FALSE
TFAP2C(var.3)	188	70	Basic helix-span-helix factors (bHSH)	AP-2	0.0827649	depleted	1	-0.271767	0.828304	FALSE
BHLHE23	82	16	Basic helix-loop-helix factors (bHLH)	Tal-related factors	0.0837463	enriched	1	0.660479	1.58061	FALSE
NKX3-1	139	32	Homeo domain factors	NK-related factors	0.0914709	enriched	1	0.421868	1.33966	FALSE
MAFK	152	36	Basic leucine zipper factors (bZIP)	Maf-related factors	0.0994657	enriched	1	0.38093	1.30218	FALSE
T	106	23	T-Box factors	Brachyury-related factors	0.102428	enriched	1	0.507286	1.42137	FALSE
SOX13	143	55	High-mobility group (HMG) domain factors	SOX-related factors	0.103037	depleted	1	-0.318561	0.801869	FALSE
POU3F1	215	55	Homeo domain factors	POU domain factors	0.104709	enriched	1	0.26976	1.20561	FALSE
SPIC	227	59	Tryptophan cluster factors	Ets-related factors	0.114967	enriched	1	0.246833	1.1866	FALSE
JUND	119	27	Basic leucine zipper factors (bZIP)	Jun-related factors	0.116883	enriched	1	0.442857	1.35929	FALSE
BATF::JUN	146	35	Basic leucine zipper factors (bZIP)::Basic leucine zipper factors (bZIP)	B-ATF-related factors::Jun-related factors	0.127244	enriched	1	0.363469	1.28652	FALSE
HNF1A	132	31	Homeo domain factors	POU domain factors	0.129272	enriched	1	0.393125	1.31323	FALSE
USF1	130	50	Basic helix-loop-helix factors (bHLH)	bHLH-ZIP factors	0.131687	depleted	1	-0.318561	0.801869	FALSE
FOSL2	124	48	Basic leucine zipper factors (bZIP)	Fos-related factors	0.133227	depleted	1	-0.327839	0.796729	FALSE
CREB3L1	94	38	Basic leucine zipper factors (bZIP)	CREB-related factors	0.134167	depleted	1	-0.390412	0.762912	FALSE
GCM2	109	43	GCM domain factors	GCM factors	0.135275	depleted	1	-0.355153	0.781787	FALSE
ESRRB	152	37	Nuclear receptors with C4 zinc fingers	Steroid hormone receptors (NR3)	0.137709	enriched	1	0.341401	1.26699	FALSE
SPIB	241	64	Tryptophan cluster factors	Ets-related factors	0.139416	enriched	1	0.215816	1.16136	FALSE
FOXO3	148	36	Fork head / winged helix factors	Forkhead box (FOX) factors	0.145248	enriched	1	0.342455	1.26791	FALSE
PLAG1	253	88	C2H2 zinc finger factors	More than 3 adjacent zinc finger factors	0.146247	depleted	1	-0.173511	0.886682	FALSE
IRF7	220	78	Tryptophan cluster factors	Interferon-regulatory factors	0.147606	depleted	1	-0.201115	0.869878	FALSE
NFIC::TLX1	175	64	SMAD/NF-1 DNA-binding domain factors::Homeo domain factors	Nuclear factor 1::NK-related factors	0.149275	depleted	1	-0.245862	0.843312	FALSE
NKX6-1	147	55	Homeo domain factors	NK-related factors	0.153408	depleted	1	-0.27876	0.824299	FALSE
E2F6	264	91	Fork head / winged helix factors	E2F-related factors	0.158599	depleted	1	-0.160473	0.894731	FALSE
NOTO	98	22	Homeo domain factors	NK-related factors	0.160371	enriched	1	0.458205	1.37383	FALSE
CEBPA	197	51	Basic leucine zipper factors (bZIP)	C/EBP-related	0.163184	enriched	1	0.252554	1.19131	FALSE
POU5F1B	197	51	Homeo domain factors	POU domain factors	0.163184	enriched	1	0.252554	1.19131	FALSE
EGR2	151	56	C2H2 zinc finger factors	Three-zinc finger KrÃ¼ppel-related factors	0.166552	depleted	1	-0.266023	0.831609	FALSE
NR1H2::RXRA	160	40	Nuclear receptors with C4 zinc fingers::Nuclear receptors with C4 zinc fingers	Thyroid hormone receptor-related factors (NR1)::RXR-related receptors (NR2)	0.167506	enriched	1	0.302927	1.23364	FALSE
GATA3	102	40	Other C4 zinc finger-type factors	GATA-type zinc fingers	0.167708	depleted	1	-0.346576	0.786449	FALSE
BACH2	196	51	Basic leucine zipper factors (bZIP)	Jun-related factors	0.177734	enriched	1	0.245212	1.18527	FALSE
TFAP4	193	69	Basic helix-loop-helix factors (bHLH)	bHLH-ZIP factors	0.178489	depleted	1	-0.21314	0.862657	FALSE
ETV2	121	46	Tryptophan cluster factors	Ets-related factors	0.181773	depleted	1	-0.301772	0.811256	FALSE
ZBTB7B	152	56	C2H2 zinc finger factors	More than 3 adjacent zinc finger factors	0.182391	depleted	1	-0.2565	0.837116	FALSE
MITF	71	15	Basic helix-loop-helix factors (bHLH)	bHLH-ZIP factors	0.187638	enriched	1	0.545784	1.45981	FALSE
FLI1	89	35	Tryptophan cluster factors	Ets-related factors	0.20623	depleted	1	-0.350622	0.784246	FALSE
FOXB1	195	69	Fork head / winged helix factors	Forkhead box (FOX) factors	0.211003	depleted	1	-0.198267	0.871597	FALSE
LMX1A	123	46	Homeo domain factors	HD-LIM factors	0.219247	depleted	1	-0.27812	0.824665	FALSE
LMX1B	123	46	Homeo domain factors	HD-LIM factors	0.219247	depleted	1	-0.27812	0.824665	FALSE
FOXD1	132	33	Fork head / winged helix factors	Forkhead box (FOX) factors	0.238898	enriched	1	0.302927	1.23364	FALSE
FOXL1	132	33	Fork head / winged helix factors	Forkhead box (FOX) factors	0.238898	enriched	1	0.302927	1.23364	FALSE
FOXI1	132	33	Fork head / winged helix factors	Forkhead box (FOX) factors	0.238898	enriched	1	0.302927	1.23364	FALSE
FOXD2	132	33	Fork head / winged helix factors	Forkhead box (FOX) factors	0.238898	enriched	1	0.302927	1.23364	FALSE
FOXO4	132	33	Fork head / winged helix factors	Forkhead box (FOX) factors	0.238898	enriched	1	0.302927	1.23364	FALSE
FOXO6	132	33	Fork head / winged helix factors	Forkhead box (FOX) factors	0.238898	enriched	1	0.302927	1.23364	FALSE
FOXP3	132	33	Fork head / winged helix factors	Forkhead box (FOX) factors	0.238898	enriched	1	0.302927	1.23364	FALSE
NRF1	200	70	Basic leucine zipper factors (bZIP)	Jun-related factors	0.243202	depleted	1	-0.1825	0.881175	FALSE
FIGLA	236	81	Basic helix-loop-helix factors (bHLH)	Tal-related factors	0.245719	depleted	1	-0.15428	0.898581	FALSE
NFATC2	263	73	Rel homology region (RHR) factors	NFAT-related factors	0.246705	enriched	1	0.152022	1.11113	FALSE
STAT1::STAT2	293	98	STAT domain factors::STAT domain factors	STAT factors::STAT factors	0.247163	depleted	1	-0.117026	0.922087	FALSE
RELA	178	63	Rel homology region (RHR) factors	NF-kappaB-related factors	0.252325	depleted	1	-0.198619	0.871384	FALSE
SREBF2	155	40	Basic helix-loop-helix factors (bHLH)	bHLH-ZIP factors	0.253479	enriched	1	0.257123	1.19509	FALSE
HOXC10	107	26	Homeo domain factors	HOX-related factors	0.256507	enriched	1	0.343954	1.26923	FALSE
NFKB2	128	47	Rel homology region (RHR) factors	NF-kappaB-related factors	0.259458	depleted	1	-0.251662	0.839928	FALSE
STAT3	275	77	STAT domain factors	STAT factors	0.259581	enriched	1	0.139428	1.10147	FALSE
MEF2C	240	66	MADS box factors	Regulators of differentiation	0.260324	enriched	1	0.165424	1.1215	FALSE
MYC	116	43	Basic helix-loop-helix factors (bHLH)	bHLH-ZIP factors	0.267542	depleted	1	-0.265357	0.831993	FALSE
VDR	116	43	Nuclear receptors with C4 zinc fingers	Thyroid hormone receptor-related factors (NR1)	0.267542	depleted	1	-0.265357	0.831993	FALSE
POU2F1	204	55	Homeo domain factors	POU domain factors	0.267759	enriched	1	0.193993	1.14393	FALSE
RFX3	96	23	Fork head / winged helix factors	RFX-related factors	0.268135	enriched	1	0.364328	1.28728	FALSE
TEF	59	24	TEA domain factors	TEF-1-related factors	0.270112	depleted	1	-0.399392	0.758178	FALSE
VAX1	107	40	Homeo domain factors	NK-related factors	0.272449	depleted	1	-0.277534	0.825	FALSE
BCL6B	184	49	C2H2 zinc finger factors	More than 3 adjacent zinc finger factors	0.273493	enriched	1	0.211779	1.15812	FALSE
SOX4	228	78	High-mobility group (HMG) domain factors	SOX-related factors	0.282733	depleted	1	-0.149585	0.90151	FALSE
POU1F1	203	55	Homeo domain factors	POU domain factors	0.28848	enriched	1	0.186903	1.13832	FALSE
SP8	268	90	C2H2 zinc finger factors	Three-zinc finger KrÃ¼ppel-related factors	0.288995	depleted	1	-0.122837	0.91838	FALSE
GATA5	120	44	Other C4 zinc finger-type factors	GATA-type zinc fingers	0.289367	depleted	1	-0.249614	0.841121	FALSE
MAX::MYC	102	38	Basic helix-loop-helix factors (bHLH)::Basic helix-loop-helix factors (bHLH)	bHLH-ZIP factors::bHLH-ZIP factors	0.300828	depleted	1	-0.272575	0.827841	FALSE
CREB3	60	24	Basic leucine zipper factors (bZIP)	CREB-related factors	0.302237	depleted	1	-0.375145	0.771028	FALSE
ZBTB33	93	35	C2H2 zinc finger factors	Other factors with up to three adjacent zinc fingers	0.304754	depleted	1	-0.287197	0.819493	FALSE
OTX2	91	22	Homeo domain factors	Paired-related HD factors	0.30491	enriched	1	0.35129	1.2757	FALSE
FOXA1	225	62	Fork head / winged helix factors	Forkhead box (FOX) factors	0.304991	enriched	1	0.162512	1.11923	FALSE
MTF1	152	54	C2H2 zinc finger factors	More than 3 adjacent zinc finger factors	0.307488	depleted	1	-0.204033	0.86812	FALSE
FOXP2	244	68	Fork head / winged helix factors	Forkhead box (FOX) factors	0.312133	enriched	1	0.146202	1.10665	FALSE
JUNB(var.2)	26	12	Basic leucine zipper factors (bZIP)	Jun-related factors	0.314115	depleted	1	-0.581596	0.668224	FALSE
TFAP2C	234	65	Basic helix-span-helix factors (bHSH)	AP-2	0.320406	enriched	1	0.150924	1.11028	FALSE
RUNX3	135	35	Runt domain factors	Runt-related factors	0.322249	enriched	1	0.25046	1.18959	FALSE
SIX1	145	38	Homeo domain factors	HD-SINE factors	0.325117	enriched	1	0.234909	1.17683	FALSE
RORB	106	39	Nuclear receptors with C4 zinc fingers	Thyroid hormone receptor-related factors (NR1)	0.32601	depleted	1	-0.254555	0.838246	FALSE
VAX2	97	36	Homeo domain factors	NK-related factors	0.33159	depleted	1	-0.267085	0.830997	FALSE
ESR2	217	60	Nuclear receptors with C4 zinc fingers	Steroid hormone receptors (NR3)	0.339877	enriched	1	0.157588	1.11542	FALSE
SCRT1	182	63	C2H2 zinc finger factors	More than 3 adjacent zinc finger factors	0.340439	depleted	1	-0.166558	0.890966	FALSE
OLIG3	93	23	Basic helix-loop-helix factors (bHLH)	Tal-related factors	0.345131	enriched	1	0.318524	1.24705	FALSE
TFDP1	208	71	Fork head / winged helix factors	E2F-related factors	0.34569	depleted	1	-0.14638	0.903515	FALSE
MSC	244	82	Basic helix-loop-helix factors (bHLH)	Tal-related factors	0.347164	depleted	1	-0.123888	0.917711	FALSE
TP53	117	30	p53 domain factors	p53-related factors	0.347706	enriched	1	0.266401	1.2028	FALSE
NKX6-2	138	49	Homeo domain factors	NK-related factors	0.350621	depleted	1	-0.203258	0.868587	FALSE
NHLH1	255	72	Basic helix-loop-helix factors (bHLH)	Tal-related factors	0.355066	enriched	1	0.127356	1.09229	FALSE
JDP2	103	26	Basic leucine zipper factors (bZIP)	Fos-related factors	0.355567	enriched	1	0.288988	1.22178	FALSE
TFAP2A(var.3)	202	69	Basic helix-span-helix factors (bHSH)	AP-2	0.35721	depleted	1	-0.147386	0.902885	FALSE
MLXIPL	50	11	Basic helix-loop-helix factors (bHLH)	bHLH-ZIP factors	0.357631	enriched	1	0.487352	1.40187	FALSE
ERG	101	37	Tryptophan cluster factors	Ets-related factors	0.358861	depleted	1	-0.248315	0.841879	FALSE
ESR1	130	34	Nuclear receptors with C4 zinc fingers	Steroid hormone receptors (NR3)	0.363091	enriched	1	0.237832	1.17922	FALSE
JUN(var.2)	130	34	Basic leucine zipper factors (bZIP)	Jun-related factors	0.363091	enriched	1	0.237832	1.17922	FALSE
GMEB2	16	8	SAND domain factors	GMEB	0.364993	depleted	1	-0.697073	0.616822	FALSE
MSX1	89	33	Homeo domain factors	NK-related factors	0.366667	depleted	1	-0.265734	0.831776	FALSE
TEAD1	193	53	TEA domain factors	TEF-1-related factors	0.368198	enriched	1	0.167464	1.12308	FALSE
RFX4	99	25	Fork head / winged helix factors	RFX-related factors	0.371295	enriched	1	0.288428	1.22131	FALSE
GATA2	143	38	Other C4 zinc finger-type factors	GATA-type zinc fingers	0.375374	enriched	1	0.214871	1.1606	FALSE
BSX	85	21	Homeo domain factors	NK-related factors	0.375672	enriched	1	0.320001	1.24833	FALSE
SP3	265	88	C2H2 zinc finger factors	Three-zinc finger KrÃ¼ppel-related factors	0.375933	depleted	1	-0.106656	0.928738	FALSE
TBX15	153	41	T-Box factors	TBX1-related factors	0.376286	enriched	1	0.202763	1.1509	FALSE
HOXA10	209	58	Homeo domain factors	HOX-related factors	0.376592	enriched	1	0.152305	1.11134	FALSE
ELK4	158	55	Tryptophan cluster factors	Ets-related factors	0.378659	depleted	1	-0.174652	0.885981	FALSE
IRF4	136	48	Tryptophan cluster factors	Interferon-regulatory factors	0.381506	depleted	1	-0.194573	0.873832	FALSE
ZBTB7A	203	69	C2H2 zinc finger factors	More than 3 adjacent zinc finger factors	0.382314	depleted	1	-0.140261	0.907355	FALSE
TP73	108	39	p53 domain factors	p53-related factors	0.383664	depleted	1	-0.227588	0.854062	FALSE
LBX1	105	38	Homeo domain factors	NK-related factors	0.386506	depleted	1	-0.230755	0.852189	FALSE
E2F8	130	46	Fork head / winged helix factors	E2F-related factors	0.389286	depleted	1	-0.198267	0.871597	FALSE
OLIG2	81	20	Basic helix-loop-helix factors (bHLH)	Tal-related factors	0.391796	enriched	1	0.320849	1.24907	FALSE
PBX1	99	36	Homeo domain factors	TALE-type homeo domain factors	0.39187	depleted	1	-0.237641	0.848131	FALSE
ZBTB18	256	85	C2H2 zinc finger factors	More than 3 adjacent zinc finger factors	0.400429	depleted	1	-0.106464	0.928862	FALSE
TBR1	172	47	T-Box factors	TBrain-related factors	0.400429	enriched	1	0.174603	1.12865	FALSE
GLIS2	207	70	C2H2 zinc finger factors	More than 3 adjacent zinc finger factors	0.402157	depleted	1	-0.132869	0.912016	FALSE
FOSL1::JUND(var.2)	45	18	Basic leucine zipper factors (bZIP)::Basic leucine zipper factors (bZIP)	Fos-related factors::Jun-related factors	0.403735	depleted	1	-0.375145	0.771028	FALSE
MIXL1	91	23	Homeo domain factors	Paired-related HD factors	0.404496	enriched	1	0.28716	1.22024	FALSE
MAFG	125	33	Basic leucine zipper factors (bZIP)	Maf-related factors	0.407666	enriched	1	0.224317	1.16822	FALSE
TFCP2	57	22	Grainyhead domain factors	CP2-related factors	0.410331	depleted	1	-0.323614	0.799065	FALSE
PPARG::RXRA	263	87	Nuclear receptors with C4 zinc fingers::Nuclear receptors with C4 zinc fingers	Thyroid hormone receptor-related factors (NR1)::RXR-related receptors (NR2)	0.410735	depleted	1	-0.101097	0.932324	FALSE
SOX21	201	56	High-mobility group (HMG) domain factors	SOX-related factors	0.415141	enriched	1	0.146624	1.10698	FALSE
EHF	138	37	Tryptophan cluster factors	Ets-related factors	0.420542	enriched	1	0.201998	1.15029	FALSE
POU5F1	230	65	Homeo domain factors	POU domain factors	0.420965	enriched	1	0.126049	1.0913	FALSE
RFX2	80	20	Fork head / winged helix factors	RFX-related factors	0.424623	enriched	1	0.302927	1.23364	FALSE
TFAP2C(var.2)	195	66	Basic helix-span-helix factors (bHSH)	AP-2	0.42717	depleted	1	-0.134137	0.911215	FALSE
AR	131	35	Nuclear receptors with C4 zinc fingers	Steroid hormone receptors (NR3)	0.428912	enriched	1	0.207067	1.15434	FALSE
ETS1	122	43	Tryptophan cluster factors	Ets-related factors	0.430835	depleted	1	-0.1926	0.875027	FALSE
ETV3	97	25	Tryptophan cluster factors	Ets-related factors	0.432111	enriched	1	0.258984	1.19664	FALSE
FOSL2::JUNB	97	25	Basic leucine zipper factors (bZIP)::Basic leucine zipper factors (bZIP)	Fos-related factors::Jun-related factors	0.432111	enriched	1	0.258984	1.19664	FALSE
FOXK1	174	48	Fork head / winged helix factors	Forkhead box (FOX) factors	0.435834	enriched	1	0.160908	1.11799	FALSE
ONECUT1	85	31	Homeo domain factors	HD-CUT factors	0.437976	depleted	1	-0.241878	0.845644	FALSE
NR1A4::RXRA	116	41	Nuclear receptors with C4 zinc fingers::Nuclear receptors with C4 zinc fingers	Thyroid hormone receptor-related factors (NR1)::RXR-related receptors (NR2)	0.438814	depleted	1	-0.196644	0.872578	FALSE
DLX6	82	30	Homeo domain factors	NK-related factors	0.440357	depleted	1	-0.246411	0.842991	FALSE
SREBF2(var.2)	62	15	Basic helix-loop-helix factors (bHLH)	bHLH-ZIP factors	0.443601	enriched	1	0.350233	1.27477	FALSE
HNF1B	117	31	Homeo domain factors	POU domain factors	0.444604	enriched	1	0.219096	1.164	FALSE
FOSB::JUNB(var.2)	40	16	Basic leucine zipper factors (bZIP)::Basic leucine zipper factors (bZIP)	Fos-related factors::Jun-related factors	0.445288	depleted	1	-0.375145	0.771028	FALSE
ATF7	43	17	Basic leucine zipper factors (bZIP)	Jun-related factors	0.448002	depleted	1	-0.358271	0.780099	FALSE
PAX9	107	38	Paired box factors	Paired domain only	0.450308	depleted	1	-0.203533	0.868421	FALSE
BARX1	107	38	Homeo domain factors	NK-related factors	0.450308	depleted	1	-0.203533	0.868421	FALSE
EBF1	180	50	Rel homology region (RHR) factors	Early B-Cell Factor-related factors	0.452249	enriched	1	0.150924	1.11028	FALSE
ATF4	104	37	Basic leucine zipper factors (bZIP)	ATF-4-related factors	0.454	depleted	1	-0.206087	0.866886	FALSE
POU3F4	193	54	Homeo domain factors	POU domain factors	0.455539	enriched	1	0.140497	1.10228	FALSE
MSX2	101	36	Homeo domain factors	NK-related factors	0.457614	depleted	1	-0.208786	0.865265	FALSE
PDX1	98	35	Homeo domain factors	HOX-related factors	0.461147	depleted	1	-0.211646	0.863551	FALSE
RXRB	161	55	Nuclear receptors with C4 zinc fingers	RXR-related receptors (NR2)	0.463313	depleted	1	-0.147516	0.902804	FALSE
NFYA	95	34	Other alpha	NFY	0.464592	depleted	1	-0.21468	0.861737	FALSE
MXI1	92	33	Basic helix-loop-helix factors (bHLH)	bHLH-ZIP factors	0.467943	depleted	1	-0.217905	0.859813	FALSE
E2F3	40	9	Fork head / winged helix factors	E2F-related factors	0.470109	enriched	1	0.45493	1.37072	FALSE
TBX5	189	53	T-Box factors	TBX2-related factors	0.476439	enriched	1	0.137249	1.09981	FALSE
MAFF	156	43	Basic leucine zipper factors (bZIP)	Maf-related factors	0.478489	enriched	1	0.162065	1.11889	FALSE
IRF1	348	103	Tryptophan cluster factors	Interferon-regulatory factors	0.480257	enriched	1	0.0593701	1.04201	FALSE
SIX2	192	54	Homeo domain factors	HD-SINE factors	0.484396	enriched	1	0.133002	1.09657	FALSE
ZIC1	246	81	C2H2 zinc finger factors	More than 3 adjacent zinc finger factors	0.489515	depleted	1	-0.0944084	0.936656	FALSE
PHOX2A	146	50	Homeo domain factors	Paired-related HD factors	0.490934	depleted	1	-0.151104	0.900561	FALSE
PROP1	162	55	Homeo domain factors	Paired-related HD factors	0.493592	depleted	1	-0.138583	0.908411	FALSE
FOSB::JUN	62	23	Basic leucine zipper factors (bZIP)::Basic leucine zipper factors (bZIP)	Fos-related factors::Jun-related factors	0.494122	depleted	1	-0.266439	0.831369	FALSE
POU6F2	132	36	Homeo domain factors	POU domain factors	0.50063	enriched	1	0.177396	1.13084	FALSE
YY2	93	33	C2H2 zinc finger factors	More than 3 adjacent zinc finger factors	0.504404	depleted	1	-0.202308	0.869159	FALSE
RUNX1	240	79	Runt domain factors	Runt-related factors	0.50605	depleted	1	-0.093963	0.936945	FALSE
HNF4A	145	40	Nuclear receptors with C4 zinc fingers	RXR-related receptors (NR2)	0.510726	enriched	1	0.160908	1.11799	FALSE
THAP1	260	85	C2CH THAP-type zinc finger factors	THAP-related factors	0.515244	depleted	1	-0.084096	0.943375	FALSE
EN2	75	27	Homeo domain factors	NK-related factors	0.526194	depleted	1	-0.223142	0.856698	FALSE
NFIL3	101	27	Basic leucine zipper factors (bZIP)	C/EBP-related	0.52648	enriched	1	0.206251	1.15369	FALSE
ZNF740	218	72	C2H2 zinc finger factors	Other factors with up to three adjacent zinc fingers	0.53118	depleted	1	-0.0988135	0.933801	FALSE
LBX2	77	20	Homeo domain factors	NK-related factors	0.533936	enriched	1	0.247786	1.18738	FALSE
HOXA2	77	20	Homeo domain factors	HOX-related factors	0.533936	enriched	1	0.247786	1.18738	FALSE
IRF2	189	63	Tryptophan cluster factors	Interferon-regulatory factors	0.535006	depleted	1	-0.11211	0.925234	FALSE
IRF3	239	69	Tryptophan cluster factors	Interferon-regulatory factors	0.535006	enriched	1	0.0952695	1.06826	FALSE
MAX	66	24	Basic helix-loop-helix factors (bHLH)	bHLH-ZIP factors	0.535508	depleted	1	-0.237641	0.848131	FALSE
SRF	66	24	MADS box factors	Responders to external signals (SRF/RLM1)	0.535508	depleted	1	-0.237641	0.848131	FALSE
SPI1	226	65	Tryptophan cluster factors	Ets-related factors	0.537679	enriched	1	0.100738	1.07232	FALSE
E2F4	202	67	Fork head / winged helix factors	E2F-related factors	0.537679	depleted	1	-0.104951	0.929837	FALSE
MNT	63	23	Basic helix-loop-helix factors (bHLH)	bHLH-ZIP factors	0.538287	depleted	1	-0.243355	0.844779	FALSE
TCF7L2	213	61	High-mobility group (HMG) domain factors	TCF-7-related factors	0.538839	enriched	1	0.106899	1.07691	FALSE
FOSL1	104	28	Basic leucine zipper factors (bZIP)	Fos-related factors	0.53973	enriched	1	0.196012	1.14553	FALSE
NFKB1	138	47	Rel homology region (RHR) factors	NF-kappaB-related factors	0.540307	depleted	1	-0.143137	0.905548	FALSE
ZBED1	27	11	C2H2 zinc finger factors	BED zinc finger factors	0.541357	depleted	1	-0.401617	0.757009	FALSE
PROX1	87	23	Homeo domain factors	HD-PROS factors	0.542799	enriched	1	0.222309	1.1666	FALSE
DMRT3	134	37	DM-type intertwined zinc finger factors	DMRT	0.543966	enriched	1	0.159563	1.11695	FALSE
FOSL1::JUN(var.2)	33	13	Basic leucine zipper factors (bZIP)::Basic leucine zipper factors (bZIP)	Fos-related factors::Jun-related factors	0.547934	depleted	1	-0.353118	0.78289	FALSE
TP63	97	26	p53 domain factors	p53-related factors	0.54885	enriched	1	0.2024	1.15061	FALSE
TCF3	248	81	Basic helix-loop-helix factors (bHLH)	E2A-related factors	0.550767	depleted	1	-0.0827266	0.944271	FALSE
NR4A2::RXRA	110	38	Nuclear receptors with C4 zinc fingers::Nuclear receptors with C4 zinc fingers	NGFI-B-related receptors (NR4)::RXR-related receptors (NR2)	0.555013	depleted	1	-0.163641	0.892769	FALSE
FOS::JUN(var.2)	82	29	Basic leucine zipper factors (bZIP)::Basic leucine zipper factors (bZIP)	Fos-related factors::Jun-related factors	0.559677	depleted	1	-0.197502	0.872059	FALSE
ONECUT2	107	37	Homeo domain factors	HD-CUT factors	0.560226	depleted	1	-0.165059	0.891892	FALSE
MEF2B	145	49	MADS box factors	Regulators of differentiation	0.561998	depleted	1	-0.131874	0.912645	FALSE
KLF5	288	93	C2H2 zinc finger factors	Three-zinc finger KrÃ¼ppel-related factors	0.565354	depleted	1	-0.0663067	0.95508	FALSE
NKX2-3	163	46	Homeo domain factors	NK-related factors	0.569341	enriched	1	0.128093	1.09285	FALSE
ZEB1	270	79	Homeo domain factors	HD-ZF factors	0.570076	enriched	1	0.075962	1.05406	FALSE
POU6F1	73	26	Homeo domain factors	POU domain factors	0.572188	depleted	1	-0.207688	0.865924	FALSE
MEIS3	184	61	Homeo domain factors	TALE-type homeo domain factors	0.581011	depleted	1	-0.104248	0.93029	FALSE
RBPJ	276	81	Rel homology region (RHR) factors	CSL-related factors	0.583123	enriched	1	0.0716016	1.05088	FALSE
HOXB2	92	32	Homeo domain factors	HOX-related factors	0.585994	depleted	1	-0.173511	0.886682	FALSE
NR3C2	116	32	Nuclear receptors with C4 zinc fingers	Steroid hormone receptors (NR3)	0.590124	enriched	1	0.160908	1.11799	FALSE
YY1	178	59	C2H2 zinc finger factors	More than 3 adjacent zinc finger factors	0.595333	depleted	1	-0.103982	0.930461	FALSE
TBX2	172	49	T-Box factors	TBX2-related factors	0.597396	enriched	1	0.114482	1.08259	FALSE
RARA(var.2)	172	49	Nuclear receptors with C4 zinc fingers	Thyroid hormone receptor-related factors (NR1)	0.597396	enriched	1	0.114482	1.08259	FALSE
HOXD11	82	22	Homeo domain factors	HOX-related factors	0.606066	enriched	1	0.201048	1.14953	FALSE
FOSL2::JUN(var.2)	80	28	Basic leucine zipper factors (bZIP)::Basic leucine zipper factors (bZIP)	Fos-related factors::Jun-related factors	0.606202	depleted	1	-0.1825	0.881175	FALSE
MYF6	175	50	Basic helix-loop-helix factors (bHLH)	MyoD / ASC-related factors	0.606592	enriched	1	0.110282	1.07944	FALSE
VSX1	102	35	Homeo domain factors	Paired-related HD factors	0.609226	depleted	1	-0.153931	0.898798	FALSE
VSX2	102	35	Homeo domain factors	Paired-related HD factors	0.609226	depleted	1	-0.153931	0.898798	FALSE
HINFP	140	47	C2H2 zinc finger factors	Factors with multiple dispersed zinc fingers	0.609228	depleted	1	-0.122379	0.918672	FALSE
HSF2	142	40	Heat shock factors	HSF factors	0.609942	enriched	1	0.130746	1.09486	FALSE
ZNF263	307	91	C2H2 zinc finger factors	More than 3 adjacent zinc finger factors	0.611349	enriched	1	0.0572273	1.04046	FALSE
MEOX2	121	41	Homeo domain factors	HOX-related factors	0.611349	depleted	1	-0.135762	0.910189	FALSE
RREB1	316	101	C2H2 zinc finger factors	Factors with multiple dispersed zinc fingers	0.614313	depleted	1	-0.0515036	0.96493	FALSE
TEAD4	191	55	TEA domain factors	TEF-1-related factors	0.618029	enriched	1	0.0989962	1.07103	FALSE
HOXD13	191	55	Homeo domain factors	HOX-related factors	0.618029	enriched	1	0.0989962	1.07103	FALSE
NRL	217	63	Basic leucine zipper factors (bZIP)	Maf-related factors	0.618625	enriched	1	0.0871984	1.06231	FALSE
FOSL2::JUN	95	26	Basic leucine zipper factors (bZIP)::Basic leucine zipper factors (bZIP)	Fos-related factors::Jun-related factors	0.624843	enriched	1	0.172343	1.12689	FALSE
NR2F2	158	45	Nuclear receptors with C4 zinc fingers	RXR-related receptors (NR2)	0.626473	enriched	1	0.114855	1.08287	FALSE
RXRG	163	54	Nuclear receptors with C4 zinc fingers	RXR-related receptors (NR2)	0.631052	depleted	1	-0.103232	0.930945	FALSE
NFIC	192	63	SMAD/NF-1 DNA-binding domain factors	Nuclear factor 1	0.632382	depleted	1	-0.0893903	0.93992	FALSE
GATA1::TAL1	128	36	Other C4 zinc finger-type factors::Basic helix-loop-helix factors (bHLH)	GATA-type zinc fingers::Tal-related factors	0.636973	enriched	1	0.133002	1.09657	FALSE
ALX3	128	36	Homeo domain factors	Paired-related HD factors	0.636973	enriched	1	0.133002	1.09657	FALSE
FOSL1::JUN	108	30	Basic leucine zipper factors (bZIP)::Basic leucine zipper factors (bZIP)	Fos-related factors::Jun-related factors	0.639305	enriched	1	0.150924	1.11028	FALSE
SRY	157	52	High-mobility group (HMG) domain factors	SOX-related factors	0.64536	depleted	1	-0.102892	0.931165	FALSE
BHLHE41	47	12	Basic helix-loop-helix factors (bHLH)	Hairy-related factors	0.648162	enriched	1	0.272553	1.20794	FALSE
LHX6	81	28	Homeo domain factors	HD-LIM factors	0.649522	depleted	1	-0.164578	0.89219	FALSE
ESRRA	154	44	Nuclear receptors with C4 zinc fingers	Steroid hormone receptors (NR3)	0.651124	enriched	1	0.110282	1.07944	FALSE
SMAD3	64	17	SMAD/NF-1 DNA-binding domain factors	SMAD factors	0.652092	enriched	1	0.215464	1.16108	FALSE
TAL1::TCF3	193	56	Basic helix-loop-helix factors (bHLH)::Basic helix-loop-helix factors (bHLH)	Tal-related factors::E2A-related factors	0.660413	enriched	1	0.0880292	1.06292	FALSE
PKNOX2	193	56	Homeo domain factors	TALE-type homeo domain factors	0.660413	enriched	1	0.0880292	1.06292	FALSE
EVX2	75	26	Homeo domain factors	HOX-related factors	0.661129	depleted	1	-0.168694	0.889648	FALSE
MEOX1	97	33	Homeo domain factors	HOX-related factors	0.661431	depleted	1	-0.141554	0.906542	FALSE
FOXC2	248	73	Fork head / winged helix factors	Forkhead box (FOX) factors	0.663092	enriched	1	0.0672989	1.04775	FALSE
HOXA5	114	32	Homeo domain factors	HOX-related factors	0.664206	enriched	1	0.135817	1.09871	FALSE
TEAD3	170	49	TEA domain factors	TEF-1-related factors	0.665149	enriched	1	0.0976082	1.07	FALSE
GLIS3	164	54	C2H2 zinc finger factors	More than 3 adjacent zinc finger factors	0.66595	depleted	1	-0.0944084	0.936656	FALSE
FOSL2::JUNB(var.2)	38	14	Basic leucine zipper factors (bZIP)::Basic leucine zipper factors (bZIP)	Fos-related factors::Jun-related factors	0.669857	depleted	1	-0.2565	0.837116	FALSE
VENTX	67	18	Homeo domain factors	NK-related factors	0.670024	enriched	1	0.199091	1.14798	FALSE
PPARG	137	39	Nuclear receptors with C4 zinc fingers	Thyroid hormone receptor-related factors (NR1)	0.670209	enriched	1	0.115557	1.08339	FALSE
DUX4	160	46	Homeo domain factors	Paired-related HD factors	0.671041	enriched	1	0.101293	1.07273	FALSE
NKX2-8	160	46	Homeo domain factors	NK-related factors	0.671041	enriched	1	0.101293	1.07273	FALSE
MYBL1	32	12	Tryptophan cluster factors	Myb/SANT domain factors	0.676246	depleted	1	-0.282035	0.82243	FALSE
HOXB3	107	30	Homeo domain factors	HOX-related factors	0.677974	enriched	1	0.137504	1.1	FALSE
ELF4	126	42	Tryptophan cluster factors	Ets-related factors	0.679761	depleted	1	-0.11211	0.925234	FALSE
RORA(var.2)	107	36	Nuclear receptors with C4 zinc fingers	Thyroid hormone receptor-related factors (NR1)	0.682291	depleted	1	-0.125531	0.916667	FALSE
ID4	252	81	Basic helix-loop-helix factors (bHLH)	HLH domain only	0.683993	depleted	1	-0.0596429	0.959502	FALSE
FOXK2	171	56	Fork head / winged helix factors	Forkhead box (FOX) factors	0.686122	depleted	1	-0.0865753	0.941756	FALSE
TFAP2A	226	73	Basic helix-span-helix factors (bHSH)	AP-2	0.686627	depleted	1	-0.0667185	0.954807	FALSE
MZF1(var.2)	226	73	C2H2 zinc finger factors	More than 3 adjacent zinc finger factors	0.686627	depleted	1	-0.0667185	0.954807	FALSE
TWIST1	226	73	Basic helix-loop-helix factors (bHLH)	Tal-related factors	0.686627	depleted	1	-0.0667185	0.954807	FALSE
JUND(var.2)	123	41	Basic leucine zipper factors (bZIP)	Jun-related factors	0.686818	depleted	1	-0.11211	0.925234	FALSE
NEUROD2	70	19	Basic helix-loop-helix factors (bHLH)	Tal-related factors	0.687218	enriched	1	0.184283	1.13625	FALSE
RFX5	90	25	Fork head / winged helix factors	RFX-related factors	0.692035	enriched	1	0.150924	1.11028	FALSE
HOXA13	205	60	Homeo domain factors	HOX-related factors	0.695286	enriched	1	0.0755166	1.05374	FALSE
TFAP2B(var.2)	223	72	Basic helix-span-helix factors (bHSH)	AP-2	0.695286	depleted	1	-0.066098	0.955218	FALSE
ETV6	152	50	Tryptophan cluster factors	Ets-related factors	0.695827	depleted	1	-0.0930015	0.93757	FALSE
HES5	101	34	Basic helix-loop-helix factors (bHLH)	Hairy-related factors	0.696014	depleted	1	-0.126324	0.916163	FALSE
GSX2	133	38	Homeo domain factors	HOX-related factors	0.696053	enriched	1	0.110282	1.07944	FALSE
NFE2L2	207	67	Basic leucine zipper factors (bZIP)	Jun-related factors	0.70301	depleted	1	-0.0696751	0.952853	FALSE
RORA	133	44	Nuclear receptors with C4 zinc fingers	Thyroid hormone receptor-related factors (NR1)	0.703312	depleted	1	-0.101222	0.932243	FALSE
FOS::JUND	103	29	Basic leucine zipper factors (bZIP)::Basic leucine zipper factors (bZIP)	Fos-related factors::Jun-related factors	0.704943	enriched	1	0.131447	1.09539	FALSE
HIF1A	83	23	Basic helix-loop-helix factors (bHLH)	PAS domain factors	0.705731	enriched	1	0.154405	1.11296	FALSE
OTX1	56	15	Homeo domain factors	Paired-related HD factors	0.711569	enriched	1	0.203391	1.1514	FALSE
TEAD2	188	61	TEA domain factors	TEF-1-related factors	0.717304	depleted	1	-0.0732214	0.950513	FALSE
NR1H4	124	41	Nuclear receptors with C4 zinc fingers	Thyroid hormone receptor-related factors (NR1)	0.7256	depleted	1	-0.100429	0.932756	FALSE
HES7	119	34	Basic helix-loop-helix factors (bHLH)	Hairy-related factors	0.726714	enriched	1	0.110282	1.07944	FALSE
NR2F1	153	50	Nuclear receptors with C4 zinc fingers	RXR-related receptors (NR2)	0.732559	depleted	1	-0.0835412	0.943738	FALSE
TFAP2B	233	69	Basic helix-span-helix factors (bHSH)	AP-2	0.736343	enriched	1	0.0585888	1.04145	FALSE
PAX7	83	28	Paired box factors	Paired plus homeo domain	0.738695	depleted	1	-0.129388	0.914219	FALSE
HEY1	80	27	Basic helix-loop-helix factors (bHLH)	Hairy-related factors	0.746101	depleted	1	-0.130032	0.913811	FALSE
EGR4	215	69	C2H2 zinc finger factors	Three-zinc finger KrÃ¼ppel-related factors	0.756492	depleted	1	-0.0574045	0.960991	FALSE
GRHL1	105	30	Grainyhead domain factors	Grainyhead-related factors	0.758403	enriched	1	0.110282	1.07944	FALSE
USF2	93	31	Basic helix-loop-helix factors (bHLH)	bHLH-ZIP factors	0.760467	depleted	1	-0.11211	0.925234	FALSE
JUN	141	46	Basic leucine zipper factors (bZIP)	Jun-related factors	0.764124	depleted	1	-0.0810835	0.945347	FALSE
TCF7L1	203	60	High-mobility group (HMG) domain factors	TCF-7-related factors	0.76585	enriched	1	0.0613725	1.04346	FALSE
EMX1	90	30	Homeo domain factors	NK-related factors	0.768276	depleted	1	-0.11211	0.925234	FALSE
ETV5	71	24	Tryptophan cluster factors	Ets-related factors	0.768995	depleted	1	-0.132288	0.912383	FALSE
IRF8	154	45	Tryptophan cluster factors	Interferon-regulatory factors	0.769747	enriched	1	0.0778606	1.05545	FALSE
EOMES	167	49	T-Box factors	TBrain-related factors	0.772374	enriched	1	0.0719216	1.05112	FALSE
TFAP2A(var.2)	248	79	Basic helix-span-helix factors (bHSH)	AP-2	0.774029	depleted	1	-0.0466573	0.968177	FALSE
SMAD2::SMAD3::SMAD4	235	75	SMAD/NF-1 DNA-binding domain factors::SMAD/NF-1 DNA-binding domain factors::SMAD/NF-1 DNA-binding domain factors	SMAD factors::SMAD factors::SMAD factors	0.774798	depleted	1	-0.0493746	0.966355	FALSE
FOSL1::JUNB	87	29	Basic leucine zipper factors (bZIP)::Basic leucine zipper factors (bZIP)	Fos-related factors::Jun-related factors	0.776199	depleted	1	-0.11211	0.925234	FALSE
HLF	78	22	Basic leucine zipper factors (bZIP)	C/EBP-related	0.780613	enriched	1	0.128898	1.09346	FALSE
ARNT::HIF1A	100	33	Basic helix-loop-helix factors (bHLH)::Basic helix-loop-helix factors (bHLH)	PAS domain factors::PAS domain factors	0.787892	depleted	1	-0.0976108	0.934579	FALSE
POU4F3	190	61	Homeo domain factors	POU domain factors	0.789157	depleted	1	-0.0579546	0.960625	FALSE
CDX2	203	65	Homeo domain factors	HOX-related factors	0.791172	depleted	1	-0.0541048	0.963192	FALSE
RELB	173	51	Rel homology region (RHR) factors	NF-kappaB-related factors	0.79163	enriched	1	0.06513	1.04618	FALSE
PRDM1	212	63	C2H2 zinc finger factors	More than 3 adjacent zinc finger factors	0.792423	enriched	1	0.0535677	1.03783	FALSE
GSC	81	23	Homeo domain factors	Paired-related HD factors	0.795113	enriched	1	0.119215	1.08614	FALSE
NFIX	184	59	SMAD/NF-1 DNA-binding domain factors	Nuclear factor 1	0.806176	depleted	1	-0.056154	0.961825	FALSE
MNX1	168	54	Homeo domain factors	HOX-related factors	0.81155	depleted	1	-0.0596429	0.959502	FALSE
NR3C1	107	31	Nuclear receptors with C4 zinc fingers	Steroid hormone receptors (NR3)	0.812164	enriched	1	0.0901978	1.06452	FALSE
SOX15	234	70	High-mobility group (HMG) domain factors	SOX-related factors	0.817112	enriched	1	0.0440088	1.03097	FALSE
HEY2	97	28	Basic helix-loop-helix factors (bHLH)	Hairy-related factors	0.817659	enriched	1	0.0954851	1.06842	FALSE
RAX	97	28	Homeo domain factors	Paired-related HD factors	0.817659	enriched	1	0.0954851	1.06842	FALSE
HOXC11	72	24	Homeo domain factors	HOX-related factors	0.817934	depleted	1	-0.11211	0.925234	FALSE
DBP	53	18	Basic leucine zipper factors (bZIP)	C/EBP-related	0.819111	depleted	1	-0.139077	0.9081	FALSE
LEF1	208	62	High-mobility group (HMG) domain factors	TCF-7-related factors	0.819871	enriched	1	0.0491705	1.03467	FALSE
NEUROD1	233	74	Basic helix-loop-helix factors (bHLH)	Tal-related factors	0.820266	depleted	1	-0.0423401	0.971079	FALSE
EWSR1-FLI1	341	107	Tryptophan cluster factors	Ets-related factors	0.822749	depleted	1	-0.0249119	0.982881	FALSE
RARA::RXRA	191	61	Nuclear receptors with C4 zinc fingers::Nuclear receptors with C4 zinc fingers	Thyroid hormone receptor-related factors (NR1)::RXR-related receptors (NR2)	0.825766	depleted	1	-0.0503814	0.965681	FALSE
NKX3-2	123	36	Homeo domain factors	NK-related factors	0.828933	enriched	1	0.0755166	1.05374	FALSE
HNF4G	198	59	Nuclear receptors with C4 zinc fingers	RXR-related receptors (NR2)	0.829383	enriched	1	0.0496407	1.03501	FALSE
DUXA	117	38	Homeo domain factors	Paired-related HD factors	0.830096	depleted	1	-0.0746357	0.949582	FALSE
SHOX	85	28	Homeo domain factors	Paired-related HD factors	0.83023	depleted	1	-0.0950369	0.936248	FALSE
ISX	85	28	Homeo domain factors	Paired-related HD factors	0.83023	depleted	1	-0.0950369	0.936248	FALSE
LHX9	85	28	Homeo domain factors	HD-LIM factors	0.83023	depleted	1	-0.0950369	0.936248	FALSE
PRRX1	85	28	Homeo domain factors	Paired-related HD factors	0.83023	depleted	1	-0.0950369	0.936248	FALSE
RAX2	85	28	Homeo domain factors	Paired-related HD factors	0.83023	depleted	1	-0.0950369	0.936248	FALSE
UNCX	85	28	Homeo domain factors	Paired-related HD factors	0.83023	depleted	1	-0.0950369	0.936248	FALSE
HSF4	136	40	Heat shock factors	HSF factors	0.832576	enriched	1	0.0684619	1.0486	FALSE
BARHL2	47	13	Homeo domain factors	NK-related factors	0.836063	enriched	1	0.157076	1.11503	FALSE
SNAI2	240	76	C2H2 zinc finger factors	More than 3 adjacent zinc finger factors	0.838623	depleted	1	-0.0381098	0.97393	FALSE
ELF3	143	46	Tryptophan cluster factors	Ets-related factors	0.841463	depleted	1	-0.0607635	0.958757	FALSE
MGA	139	41	T-Box factors	TBX6-related factors	0.843082	enriched	1	0.0643162	1.04559	FALSE
FOXC1	211	67	Fork head / winged helix factors	Forkhead box (FOX) factors	0.846618	depleted	1	-0.0420629	0.971265	FALSE
ELF1	116	34	Tryptophan cluster factors	Ets-related factors	0.847191	enriched	1	0.0734453	1.05223	FALSE
MLX	44	15	Basic helix-loop-helix factors (bHLH)	bHLH-ZIP factors	0.847542	depleted	1	-0.144532	0.904673	FALSE
TCF4	250	79	Basic helix-loop-helix factors (bHLH)	E2A-related factors	0.847641	depleted	1	-0.0350693	0.975985	FALSE
TFE3	60	20	Basic helix-loop-helix factors (bHLH)	bHLH-ZIP factors	0.854874	depleted	1	-0.11211	0.925234	FALSE
GATA6	155	46	Other C4 zinc finger-type factors	GATA-type zinc fingers	0.855308	enriched	1	0.0554896	1.03921	FALSE
ELF5	181	54	Tryptophan cluster factors	Ets-related factors	0.857053	enriched	1	0.0478855	1.03375	FALSE
NFIA	181	54	SMAD/NF-1 DNA-binding domain factors	Nuclear factor 1	0.857053	enriched	1	0.0478855	1.03375	FALSE
CREB1	76	25	Basic leucine zipper factors (bZIP)	CREB-related factors	0.857615	depleted	1	-0.0930015	0.93757	FALSE
BHLHE40	57	19	Basic helix-loop-helix factors (bHLH)	Hairy-related factors	0.8648	depleted	1	-0.11211	0.925234	FALSE
HOXB13	197	59	Homeo domain factors	HOX-related factors	0.866229	enriched	1	0.0423359	1.02978	FALSE
HSF1	122	36	Heat shock factors	HSF factors	0.869465	enriched	1	0.0637395	1.04517	FALSE
RHOXF1	112	33	Homeo domain factors	Paired-related HD factors	0.877431	enriched	1	0.0658879	1.04673	FALSE
EN1	89	26	Homeo domain factors	NK-related factors	0.881052	enriched	1	0.0782208	1.05572	FALSE
NR4A1	151	45	Nuclear receptors with C4 zinc fingers	NGFI-B-related receptors (NR4)	0.883831	enriched	1	0.0494788	1.03489	FALSE
ZBTB7C	170	54	C2H2 zinc finger factors	More than 3 adjacent zinc finger factors	0.886876	depleted	1	-0.0425694	0.970924	FALSE
NEUROG2	115	34	Basic helix-loop-helix factors (bHLH)	Tal-related factors	0.888654	enriched	1	0.0609543	1.04316	FALSE
FOS::JUN	96	31	Basic leucine zipper factors (bZIP)::Basic leucine zipper factors (bZIP)	Fos-related factors::Jun-related factors	0.893275	depleted	1	-0.0663067	0.95508	FALSE
KLF13	125	40	C2H2 zinc finger factors	Three-zinc finger KrÃ¼ppel-related factors	0.894515	depleted	1	-0.0532167	0.963785	FALSE
CEBPG	69	20	Basic leucine zipper factors (bZIP)	C/EBP-related	0.896312	enriched	1	0.0895235	1.06402	FALSE
PKNOX1	180	57	Homeo domain factors	TALE-type homeo domain factors	0.898067	depleted	1	-0.0381098	0.97393	FALSE
RXRA::VDR	118	35	Nuclear receptors with C4 zinc fingers::Nuclear receptors with C4 zinc fingers	RXR-related receptors (NR2)::Thyroid hormone receptor-related factors (NR1)	0.899672	enriched	1	0.0562872	1.03979	FALSE
NR2C2	245	77	Nuclear receptors with C4 zinc fingers	RXR-related receptors (NR2)	0.903818	depleted	1	-0.0272215	0.981308	FALSE
PPARA::RXRA	183	55	Nuclear receptors with C4 zinc fingers::Nuclear receptors with C4 zinc fingers	Thyroid hormone receptor-related factors (NR1)::RXR-related receptors (NR2)	0.903818	enriched	1	0.0372673	1.02617	FALSE
ELK3	77	25	Tryptophan cluster factors	Ets-related factors	0.90613	depleted	1	-0.0741425	0.949907	FALSE
CLOCK	77	25	Basic helix-loop-helix factors (bHLH)	PAS domain factors	0.90613	depleted	1	-0.0741425	0.949907	FALSE
TBX20	177	56	T-Box factors	TBX1-related factors	0.906968	depleted	1	-0.0368222	0.9748	FALSE
ZNF384	322	98	C2H2 zinc finger factors	More than 3 adjacent zinc finger factors	0.908475	enriched	1	0.0191342	1.01335	FALSE
SP1	307	96	C2H2 zinc finger factors	Three-zinc finger KrÃ¼ppel-related factors	0.910499	depleted	1	-0.0199405	0.986273	FALSE
KLF14	199	60	C2H2 zinc finger factors	Three-zinc finger KrÃ¼ppel-related factors	0.912548	enriched	1	0.0326612	1.0229	FALSE
JUNB	119	38	Basic leucine zipper factors (bZIP)	Jun-related factors	0.91301	depleted	1	-0.0501826	0.965814	FALSE
E2F7	119	38	Fork head / winged helix factors	E2F-related factors	0.91301	depleted	1	-0.0501826	0.965814	FALSE
MAF::NFE2	186	56	Basic leucine zipper factors (bZIP)::Basic leucine zipper factors (bZIP)	Maf-related factors::Jun-related factors	0.913121	enriched	1	0.034731	1.02437	FALSE
NR4A2	160	48	Nuclear receptors with C4 zinc fingers	NGFI-B-related receptors (NR4)	0.913273	enriched	1	0.0398927	1.02804	FALSE
STAT1	226	71	STAT domain factors	STAT factors	0.921679	depleted	1	-0.026641	0.981703	FALSE
INSM1	244	74	C2H2 zinc finger factors	Factors with multiple dispersed zinc fingers	0.926796	enriched	1	0.0242111	1.01692	FALSE
GSX1	101	30	Homeo domain factors	HOX-related factors	0.929055	enriched	1	0.054248	1.03832	FALSE
ISL2	113	36	Homeo domain factors	HD-LIM factors	0.932029	depleted	1	-0.0468189	0.968069	FALSE
ZNF143	153	46	C2H2 zinc finger factors	More than 3 adjacent zinc finger factors	0.932507	enriched	1	0.036753	1.0258	FALSE
NFYB	97	31	Other alpha	NFY	0.937905	depleted	1	-0.0513563	0.965029	FALSE
EMX2	68	22	Homeo domain factors	NK-related factors	0.938264	depleted	1	-0.0690416	0.953271	FALSE
HOXC12	91	27	Homeo domain factors	HOX-related factors	0.938841	enriched	1	0.0558343	1.03946	FALSE
Pax6	117	35	Paired box factors	Paired plus homeo domain	0.941359	enriched	1	0.0440088	1.03097	FALSE
TBX21	165	52	T-Box factors	TBrain-related factors	0.942979	depleted	1	-0.0311904	0.978613	FALSE
SREBF1	136	43	Basic helix-loop-helix factors (bHLH)	bHLH-ZIP factors	0.947718	depleted	1	-0.0358748	0.97544	FALSE
FOSB::JUNB	94	30	Basic leucine zipper factors (bZIP)::Basic leucine zipper factors (bZIP)	Fos-related factors::Jun-related factors	0.948107	depleted	1	-0.0493746	0.966355	FALSE
MEIS2	217	68	Homeo domain factors	TALE-type homeo domain factors	0.94896	depleted	1	-0.0229845	0.984195	FALSE
POU4F2	198	60	Homeo domain factors	POU domain factors	0.949946	enriched	1	0.0253932	1.01776	FALSE
MYB	175	55	Tryptophan cluster factors	Myb/SANT domain factors	0.953891	depleted	1	-0.0272215	0.981308	FALSE
PBX2	159	50	Homeo domain factors	TALE-type homeo domain factors	0.961301	depleted	1	-0.0280461	0.980748	FALSE
FEV	84	25	Tryptophan cluster factors	Ets-related factors	0.961321	enriched	1	0.0513884	1.03626	FALSE
ESX1	84	25	Homeo domain factors	Paired-related HD factors	0.961321	enriched	1	0.0513884	1.03626	FALSE
FOS	123	37	Basic leucine zipper factors (bZIP)	Fos-related factors	0.962334	enriched	1	0.0359883	1.02526	FALSE
EVX1	75	24	Homeo domain factors	HOX-related factors	0.965801	depleted	1	-0.0532167	0.963785	FALSE
FOXP1	198	62	Fork head / winged helix factors	Forkhead box (FOX) factors	0.965879	depleted	1	-0.0219126	0.984926	FALSE
PAX5	130	41	Paired box factors	Paired domain only	0.966746	depleted	1	-0.0322571	0.977889	FALSE
SP4	224	70	C2H2 zinc finger factors	Three-zinc finger KrÃ¼ppel-related factors	0.968194	depleted	1	-0.019001	0.986916	FALSE
XBP1	59	19	Basic leucine zipper factors (bZIP)	XBP-1-related factors	0.973785	depleted	1	-0.0623573	0.957698	FALSE
POU4F1	195	61	Homeo domain factors	POU domain factors	0.974946	depleted	1	-0.0204799	0.985905	FALSE
CDX1	195	61	Homeo domain factors	HOX-related factors	0.974946	depleted	1	-0.0204799	0.985905	FALSE
PBX3	221	69	Homeo domain factors	TALE-type homeo domain factors	0.977292	depleted	1	-0.0176948	0.98781	FALSE
ETV1	72	23	Tryptophan cluster factors	Ets-related factors	0.977326	depleted	1	-0.0507098	0.965461	FALSE
GBX1	72	23	Homeo domain factors	HOX-related factors	0.977326	depleted	1	-0.0507098	0.965461	FALSE
REL	166	52	Rel homology region (RHR) factors	NF-kappaB-related factors	0.981382	depleted	1	-0.0224732	0.984543	FALSE
MEF2A	179	56	MADS box factors	Regulators of differentiation	0.982755	depleted	1	-0.020612	0.985814	FALSE
POU2F2	249	76	Homeo domain factors	POU domain factors	0.982755	enriched	1	0.0150016	1.01045	FALSE
ETV4	77	23	Tryptophan cluster factors	Ets-related factors	0.985186	enriched	1	0.0461517	1.03251	FALSE
HIC2	205	64	C2H2 zinc finger factors	Factors with multiple dispersed zinc fingers	0.985237	depleted	1	-0.0175928	0.98788	FALSE
MYCN	69	22	Basic helix-loop-helix factors (bHLH)	bHLH-ZIP factors	0.989234	depleted	1	-0.04798	0.96729	FALSE
CEBPE	69	22	Basic leucine zipper factors (bZIP)	C/EBP-related	0.989234	depleted	1	-0.04798	0.96729	FALSE
ONECUT3	150	47	Homeo domain factors	HD-CUT factors	0.989306	depleted	1	-0.022843	0.984291	FALSE
FOSL1::JUND	93	28	Basic leucine zipper factors (bZIP)::Basic leucine zipper factors (bZIP)	Fos-related factors::Jun-related factors	0.995864	enriched	1	0.034731	1.02437	FALSE
ZIC3	254	79	C2H2 zinc finger factors	More than 3 adjacent zinc finger factors	0.998844	depleted	1	-0.0121689	0.991601	FALSE
CEBPB	68	21	Basic leucine zipper factors (bZIP)	C/EBP-related	1	depleted	1	-0.00192745	0.998665	FALSE
HOXD12	66	20	Homeo domain factors	HOX-related factors	1	enriched	1	0.0253932	1.01776	FALSE
JUN::JUNB(var.2)	66	20	Basic leucine zipper factors (bZIP)::Basic leucine zipper factors (bZIP)	Jun-related factors::Jun-related factors	1	enriched	1	0.0253932	1.01776	FALSE
SPDEF	97	30	Tryptophan cluster factors	Ets-related factors	1	depleted	1	-0.00405062	0.997196	FALSE
TFEC	97	30	Basic helix-loop-helix factors (bHLH)	bHLH-ZIP factors	1	depleted	1	-0.00405062	0.997196	FALSE
PAX3	86	26	Paired box factors	Paired plus homeo domain	1	enriched	1	0.0287522	1.02013	FALSE
GSC2	77	24	Homeo domain factors	Paired-related HD factors	1	depleted	1	-0.0152488	0.989486	FALSE
KLF9	273	84	C2H2 zinc finger factors	Three-zinc finger Kruppel-related factors	1	enriched	1	0.00336685	1.00234	FALSE
TGIF2	157	49	Homeo domain factors	TALE-type homeo domain factors	1	depleted	1	-0.017162	0.988175	FALSE
HESX1	79	24	Homeo domain factors	Paired-related HD factors	1	enriched	1	0.0217454	1.01519	FALSE
REST	269	83	C2H2 zinc finger factors	Factors with multiple dispersed zinc fingers	1	depleted	1	-0.000649936	0.99955	FALSE
TGIF1	164	50	Homeo domain factors	TALE-type homeo domain factors	1	enriched	1	0.0166229	1.01159	FALSE
JUN::JUNB	86	27	Basic leucine zipper factors (bZIP)::Basic leucine zipper factors (bZIP)	Jun-related factors::Jun-related factors	1	depleted	1	-0.0256956	0.982347	FALSE
RARA	140	43	Nuclear receptors with C4 zinc fingers	Thyroid hormone receptor-related factors (NR1)	1	enriched	1	0.0059454	1.00413	FALSE
JDP2(var.2)	65	20	Basic leucine zipper factors (bZIP)	Fos-related factors	1	enriched	1	0.00336685	1.00234	FALSE
PITX3	93	29	Homeo domain factors	Paired-related HD factors	1	depleted	1	-0.0158951	0.989043	FALSE
HMBOX1	65	20	Homeo domain factors	POU domain factors	1	enriched	1	0.00336685	1.00234	FALSE
IRF9	183	57	Tryptophan cluster factors	Interferon-regulatory factors	1	depleted	1	-0.014263	0.990162	FALSE
ZIC4	251	78	C2H2 zinc finger factors	More than 3 adjacent zinc finger factors	1	depleted	1	-0.0109315	0.992451	FALSE
FOSL2::JUND	92	28	Basic leucine zipper factors (bZIP)::Basic leucine zipper factors (bZIP)	Fos-related factors::Jun-related factors	1	enriched	1	0.0191342	1.01335	FALSE
SP2	306	94	C2H2 zinc finger factors	Three-zinc finger KrÃ¼ppel-related factors	1	enriched	1	0.00572612	1.00398	FALSE
SOX9	124	38	High-mobility group (HMG) domain factors	SOX-related factors	1	enriched	1	0.00919593	1.00639	FALSE
CEBPD	69	21	Basic leucine zipper factors (bZIP)	C/EBP-related	1	enriched	1	0.0191342	1.01335	FALSE
LHX2	92	29	Homeo domain factors	HD-LIM factors	1	depleted	1	-0.0314919	0.978408	FALSE
MEIS1	118	37	Homeo domain factors	TALE-type homeo domain factors	1	depleted	1	-0.0238832	0.983582	FALSE
SCRT2	198	61	C2H2 zinc finger factors	More than 3 adjacent zinc finger factors	1	enriched	1	0.00154642	1.00107	FALSE
RUNX2	98	30	Runt domain factors	Runt-related factors	1	enriched	1	0.0107464	1.00748	FALSE
GLIS1	125	38	C2H2 zinc finger factors	More than 3 adjacent zinc finger factors	1	enriched	1	0.0207839	1.01451	FALSE
MEF2D	167	52	MADS box factors	Regulators of differentiation	1	depleted	1	-0.0138083	0.990474	FALSE
CTCF	248	76	C2H2 zinc finger factors	More than 3 adjacent zinc finger factors	1	enriched	1	0.00919593	1.00639	FALSE
BATF3	96	30	Basic leucine zipper factors (bZIP)	B-ATF-related factors	1	depleted	1	-0.019001	0.986916	FALSE
FOS::JUNB	89	27	Basic leucine zipper factors (bZIP)::Basic leucine zipper factors (bZIP)	Fos-related factors::Jun-related factors	1	enriched	1	0.0237731	1.01661	FALSE
E2F1	33	10	Fork head / winged helix factors	E2F-related factors	1	enriched	1	0.0253932	1.01776	FALSE
ELK1	73	23	Tryptophan cluster factors	Ets-related factors	1	depleted	1	-0.0308103	0.97887	FALSE
PAX4	62	19	Paired box factors	Paired plus homeo domain	1	enriched	1	0.00919593	1.00639	FALSE
MYBL2	33	10	Tryptophan cluster factors	Myb/SANT domain factors	1	enriched	1	0.0253932	1.01776	FALSE
FOSL2::JUND(var.2)	74	23	Basic leucine zipper factors (bZIP)::Basic leucine zipper factors (bZIP)	Fos-related factors::Jun-related factors	1	depleted	1	-0.0111815	0.99228	FALSE
GBX2	87	27	Homeo domain factors	HOX-related factors	1	depleted	1	-0.00901687	0.993769	FALSE
FOXH1	165	51	Fork head / winged helix factors	Forkhead box (FOX) factors	1	depleted	1	-0.00317599	0.997801	FALSE
GCM1	161	49	GCM domain factors	GCM factors	1	enriched	1	0.0191342	1.01335	FALSE
TFEB	83	25	Basic helix-loop-helix factors (bHLH)	bHLH-ZIP factors	1	enriched	1	0.0341104	1.02393	FALSE
KLF16	267	83	C2H2 zinc finger factors	Three-zinc finger KrÃ¼ppel-related factors	1	depleted	1	-0.0114164	0.992118	FALSE
ZNF410	112	34	C2H2 zinc finger factors	More than 3 adjacent zinc finger factors	1	enriched	1	0.0228192	1.01594	FALSE
TBX1	158	49	T-Box factors	TBX1-related factors	1	depleted	1	-0.00800196	0.994469	FALSE
TBX4	158	49	T-Box factors	TBX2-related factors	1	depleted	1	-0.00800196	0.994469	FALSE
E2F2	56	17	Fork head / winged helix factors	E2F-related factors	1	enriched	1	0.0228192	1.01594	FALSE
GRHL2	185	57	Grainyhead domain factors	Grainyhead-related factors	1	enriched	1	0.00141858	1.00098	FALSE
ZNF24	160	50	C2H2 zinc finger factors	More than 3 adjacent zinc finger factors	1	depleted	1	-0.019001	0.986916	FALSE
